# Supplementary material for: Development and applications of heterogeneous chiral bifunctional alkaloid-thioureas as recyclable organocatalysts
Source: Royal Society of Chemistry journal article supplement (doi:10.1039/d5ob01582k), 2025-01-01
Supplement: d5ob01582k1.pdf [file d5ob01582k1.pdf]

## Development and Applications of Heterogeneous Chiral Bifunctional Alkaloid-Thioureas as Recyclable Organocatalysts

Ainara Pellicer,<sup>a, c</sup> Xabier del Corte,<sup>a</sup> Nora Aranburu,<sup>b</sup> Javier Vicario,<sup>a</sup> Patrick Toullec<sup>\*c</sup> and Aitor Maestro,<sup>\*</sup>

<sup>a</sup> Department of Organic Chemistry I, Faculty of Pharmacy, University of the Basque Country UPV/EHU, Paseo de la Universidad 7, 01006 Vitoria-Gasteiz, Spain.

<sup>b</sup> POLYMAT and Department of Advanced Polymers and Materials: Physics, Chemistry, and Technology, Faculty of Chemistry, University of the Basque Country UPV/EHU, Paseo Manuel de Lardizabal 3, Donostia-San Sebastián, 20018, Spain

<sup>c</sup> CNRS, Bordeaux INP, ISM, UMR 5255, University of Bordeaux, 33400 Talence (France)

E-mail: aitor.maestro@ehu.eus

### Table of content

|                                                                                |    |
|--------------------------------------------------------------------------------|----|
| General Experimental Information .....                                         | 2  |
| Synthesis and characterization of Merrifield-supported thiourea catalysts..... | 4  |
| Reactor setup .....                                                            | 11 |
| Synthesis and characterization of imines <b>3</b> .....                        | 11 |
| Synthesis and characterization of $\beta$ -nitro amines <b>4</b> .....         | 14 |
| Synthesis and characterization of Michael adducts <b>6</b> .....               | 17 |
| Chiral HPLC chromatograms of <b>4</b> .....                                    | 21 |
| Chiral HPLC chromatograms of <b>6</b> .....                                    | 33 |
| NMR spectra of <b>3</b> .....                                                  | 42 |
| NMR spectra of <b>4</b> .....                                                  | 56 |
| NMR spectra of <b>6</b> .....                                                  | 69 |
| References.....                                                                | 78 |

## General Experimental Information

Solvents and chemicals were obtained from typical commercial vendors and were used as received, without any further purification. Starting materials were synthesized according to literature protocols.

Solvents for extraction, chromatography and crystallization were technical grade. All solvents used in reactions were treated with dry molecular sieves as specified in the literature.<sup>1</sup>

When required, chromatographic purification was performed by flash chromatography using commercial grades of silica gel finer than 230 mesh with pressure. Analytical thin-layer chromatography (TLC) was carried out using 60 F<sub>254</sub> TLC aluminum plates. Compounds were visualized by means of UV or by using KMnO<sub>4</sub>.

<sup>1</sup>H, and <sup>13</sup>C-NMR spectra were recorded on a Bruker Avance 400 spectrometer instrument at room temperature, in CDCl<sub>3</sub> or acetone-d<sub>6</sub> as a solvent, at 300 MHz and 75 MHz, respectively. Chemical shifts ( $\delta$ ) are reported in ppm relative to the residual solvent peak (CDCl<sub>3</sub>, <sup>1</sup>H: 7.26 ppm; <sup>13</sup>C: 77.16 ppm. Acetone-d<sub>6</sub> <sup>1</sup>H: 2.09 ppm; <sup>13</sup>C: 205.87, 30.60 ppm). External reference CFCI<sub>3</sub> ( $\delta$ F = 0.0 ppm) is used for <sup>19</sup>F NMR spectra. Coupling constants (*J*) are reported in Hertz. <sup>13</sup>C NMR spectra were recorded in a broad band decoupled mode, and peak assignments were supported by Distortionless Enhanced Polarization Transfer (DEPT). Multiplicity is reported with the usual abbreviations.

High resolution mass spectra (HRMS) spectra were obtained by positive-ion electrospray ionization (ESI) using a LC-QTOF method. Data are reported in the form *m/z* (intensity relative to base = 100).

Chiral HPLC analysis was performed on a HPLC Agilent 1100/1200 Series system, with Chiracel® IA, Chiracel® IC and Chiracel® OD-H columns as stationary phases.

The absolute configuration was determined by comparison of chiral HPLC data with literature reports for compound **4a** and **6c**, and the absolute configurations of other compounds were assigned by analogy.<sup>2,3</sup>

The infrared spectra (FTIR) were registered using a Nicolet iS10 spectrophotometer (Thermo Scientific), using Smart iTR accessory (ATR) and reporting the value of the peaks in cm<sup>-1</sup>. IR spectra were taken as neat solids.

Elemental analysis was carried out according to the protocol described below. For calibration, five tin capsules were packed with acetanilide test samples of varying mass. The mass of samples was chosen so as to make the absolute content of the detected elements cover all their expected concentration range in the analyzed samples. Samples to be analyzed were placed in tin capsules, weighed and packed carefully. The prepared calibration and analysis samples were placed in the auto-sampler wherefrom they were periodically tipped into a vertical quartz reactor heated at a temperature of 980 °C with a constant flow of helium stream. A few seconds before introduction, the helium stream was enriched with high purity oxygen. The combustion gas mixture is driven through a chromium oxide zone to achieve a complete quantitative oxidation followed by a reduction step in a copper zone to reduce nitrogen oxides to nitrogen. The resulting components N<sub>2</sub>, CO<sub>2</sub>, H<sub>2</sub>O are separated in a chromatographic column and detected by a thermo conductivity detector. The resulting signals, proportional to the amount of eluted gasses, are analyzed by Callidus® software which automatically provides the sample elemental composition report.

Orbital shakers IKA® KS 130 basic were used for all reactions involving the Merrifield resin derived polymer-supported catalysts.

Scanning electron microscopy (SEM) was used to study the morphology. A Hitachi TM3030Plus microscope (Tokyo, Japan), equipped with a secondary electron detector and an accelerating voltage of 15 kV, was employed. The samples were gold-coated prior to analysis. Morphological observations were also carried out using a Nikon Eclipse TS100 optical microscope equipped with a biocular head, Nikon C-W10 B/12 eyepieces, and an ELWD 0.3/OD75 objective lens. The internal calibration of the optical microscope was done using a Neubauer cell.

## Synthesis and characterization of Merrifield-supported thiourea catalysts

### Synthesis of cinchona alkaloid derived chiral amines:

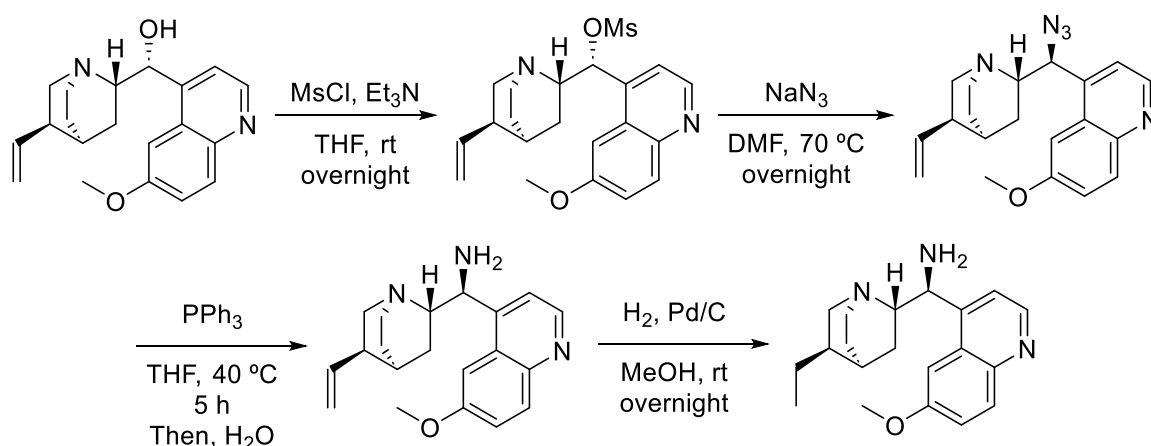

General procedure is described for Quinine. The same procedures were used for other Quinidine, Cinchonine and Cinchonidine.

**Step 1, alcohol mesylation:** Quinine (1 equiv., 8.11 g, 25 mmol) was dissolved in a mixture of dry THF (50 mL) and  $\text{Et}_3\text{N}$  (3.6 equiv., 12.5 mL, 90 mmol). After cooling the resulting solution to  $0^\circ\text{C}$ , methanesulfonyl chloride (1.8 equiv., 3.48 mL, 45 mmol) was added dropwise. The mixture was stirred at room temperature overnight. Afterwards, the reaction was quenched with water (40 mL) and extracted with DCM (3 x 60 mL). The combined organic extracts were dried over  $\text{MgSO}_4$ , filtered and the solvent was evaporated. The product was used directly in the next step without further purification.

**Step 2, azide  $\text{SN}_2$ :** The crude mesylated alkaloid (1 equiv., 10.0 g, 25 mmol) was dissolved in dry DMF (50 mL). The solution was cooled to  $0^\circ\text{C}$  and  $\text{NaN}_3$  (2 equiv., 3.25 g, 50 mmol) was added gradually in portions. The mixture was stirred at  $70^\circ\text{C}$  overnight and subsequently the reaction was quenched with water (40 mL) and extracted with ethyl acetate (3 x 60 mL). The organic layers were combined and washed with brine several times (15 x 50 mL) to remove DMF traces, dried over  $\text{MgSO}_4$  and concentrated under vacuum to afford the crude product, which was used in the next step without additional purification.

**Step 3, Staudinger reaction:** The crude azide (1 equiv., 8.74 g, 25 mmol) was dissolved in anhydrous THF (50 mL) under  $\text{N}_2$  atmosphere and  $\text{PPh}_3$  (1.05 equiv., 6.89 g, 26.25 mmol) was added in portions. The reaction mixture was stirred at  $40^\circ\text{C}$  for 5 h. Then, water (5 mL) was added and the mixture was stirred overnight at  $40^\circ\text{C}$ . After solvent removal, the residue was dissolved in aqueous HCl (2N, 80 mL) and wash with DCM (3 x 60 mL). The aqueous layer was basified with NaOH 40 % and extracted with  $\text{Et}_2\text{O}$  (3 x 60 mL). The combined  $\text{Et}_2\text{O}$  phases were dried over  $\text{MgSO}_4$ , filtered and the solvent was evaporated to afford 5.73 g (71% from Quinine) of 9-amino-(9- deoxy)epiquinine as a yellow viscous oil.

**Step 4, alkene reduction:** 9-amino-(9- deoxy)epiquinine (1 equiv., 0.647 g, 2 mmol) was dissolved in MeOH (10 mL) and added to a solution of Pd on activated charcoal 10% (0.1 equiv., 0.21 g, 0.2 mmol) in MeOH (20 mL). The reaction mixture then purged with  $\text{H}_2$  and shaken overnight at 5 bar of  $\text{H}_2$ . The reaction mixture was filtered through a short pad of celite and washed with MeOH (3x30 mL) and

concentrated under reduced pressure to obtain 0.5 g (77%) (S)-((1S,2S,4S,5R)-5-ethylquinuclidin-2-yl)(6-methoxyquinolin-4-yl)methanamine as a dark viscous oil.

The reported data match the literature.<sup>4</sup>

#### General procedure for the synthesis of Merrifield-supported chiral catalysts I-XII:

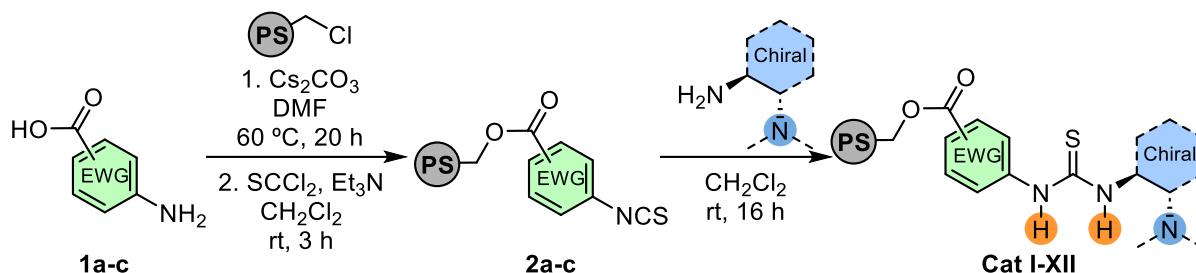

The synthesis of catalysts **V** is used as example. Other thiourea catalysts were synthesized using analogous procedures. Squaramide catalyst **III** was synthesized following the procedure described in the literature.<sup>5,6</sup>

**Step 1, PS-NH<sub>2</sub>:** Merrifield resin (1 equiv., 1 g, *f* = 1.6 mmol/g, 1.6 mmol) was swollen in dry DMF (6 mL) under N<sub>2</sub> atmosphere, stirring in an orbital shaker. Then, Cs<sub>2</sub>CO<sub>3</sub> (1.5 equiv., 0.78 g, 2.4 mmol) and 4-amino-2-(trifluoromethyl)benzoic acid (1.5 equiv., 0.49 g, 2.4 mmol) were added to the previous suspension and the reaction mixture was shaken at room temperature for 1h and afterwards, at 65 °C overnight. The resulting resin was allowed to cool down to room temperature, filtered and washed successively with water (60 mL), water/MeOH 1:1 (60 mL), MeOH/CH<sub>2</sub>Cl<sub>2</sub> 1:1 (60 mL) and (60 mL). The resin was dried overnight at 50 °C.

**Step 2, PS-NCS:** PS-NH<sub>2</sub> (1 equiv., 0.9 g, 1.48 mmol) was swollen for 30 min in dry DCM. Then, Et<sub>3</sub>N (4 equiv., 0.82 mL, 5.92 mmol) and thiophosgene (1.2 equiv., 0.14 mL, 1.77 mmol) were added dropwise to the suspension at room temperature under N<sub>2</sub> atmosphere. After 3h, the dark brown mixture was filtered and the resin was washed with DCM (60 mL), THF (60 mL) and DCM (60 mL). The resin was dried under vacuum for 30 min and used directly in the next step.

**Step 3, Cat. V:** PS-NCS (1 equiv., 0.7 g, 1.08 mmol) was pre-swollen in dry DCM for 30 min, and 9-amino-9-deoxyepiquinine (1.5 equiv., 0.52 g, 1.6 mmol) was subsequently added at room temperature. After shaking 16h, the dark brown reaction mixture was filtered and the resin was washed with DCM (60 mL), THF (60 mL) and DCM (60 mL). The resin was dried under vacuum for 12h.

The reported data match the literature.<sup>7</sup>

The catalyst loading of the resin was calculated based on the N elemental analysis by using the following formula:

$$f \left( \frac{\text{mmol}}{\text{g}} \right) = \frac{\%N \times 1000}{\text{number of N atoms} \times MW(N) \times 100}$$

**Elem. Anal. N:** 5.04%.

*f* = 0.90 mmol/g

### As-prepared catalyst

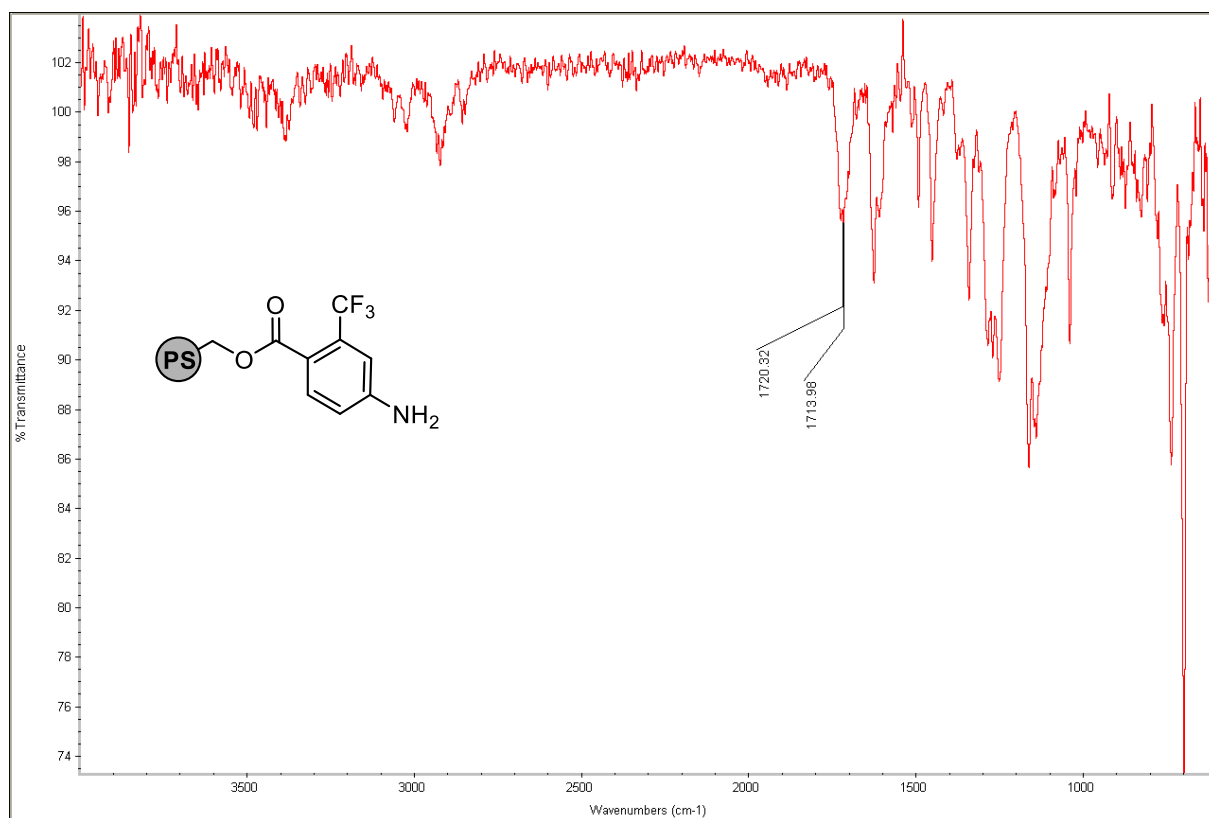

**Figure S1.** FTIR of the as-prepared PS-NH<sub>2</sub>.

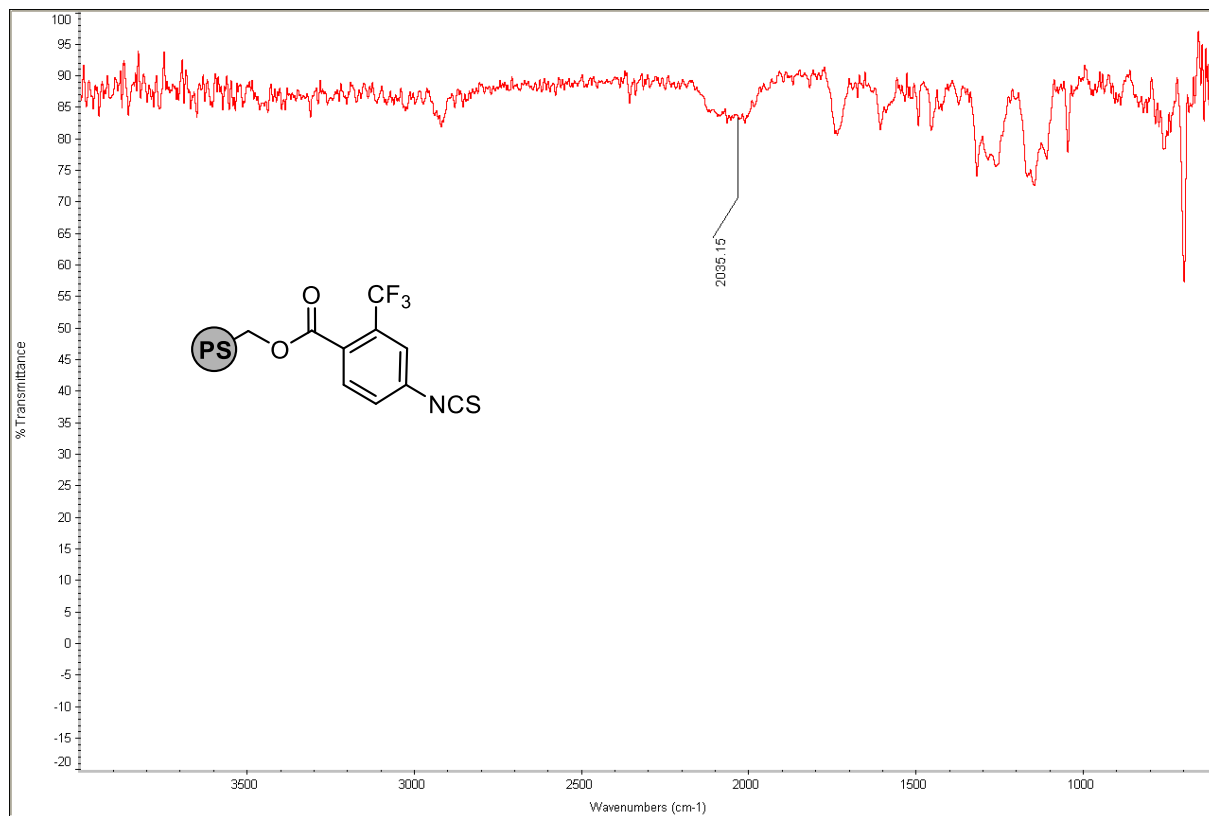

**Figure S2.** FTIR of the as-prepared PS-NCS.

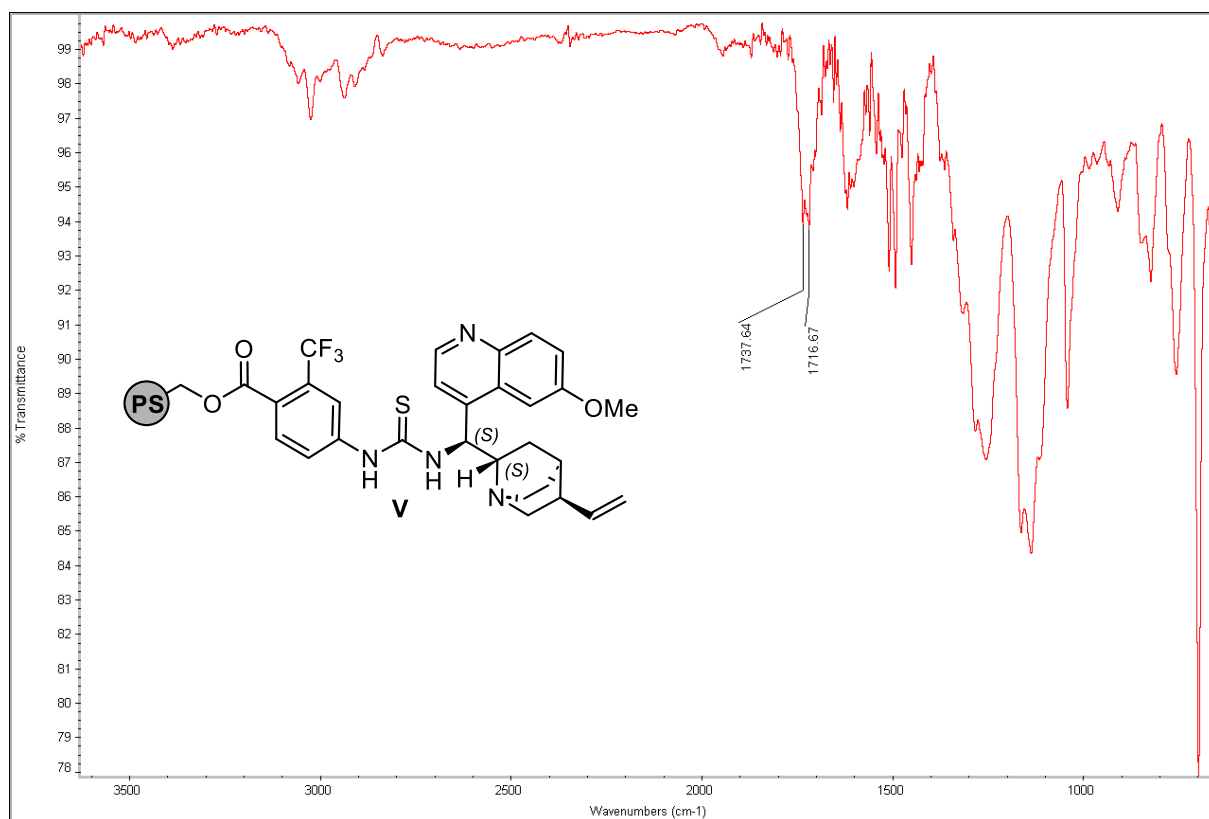

**Figure S3.** FTIR of the as-prepared catalyst **V**.

**Used catalyst (aza-Henry reaction)**

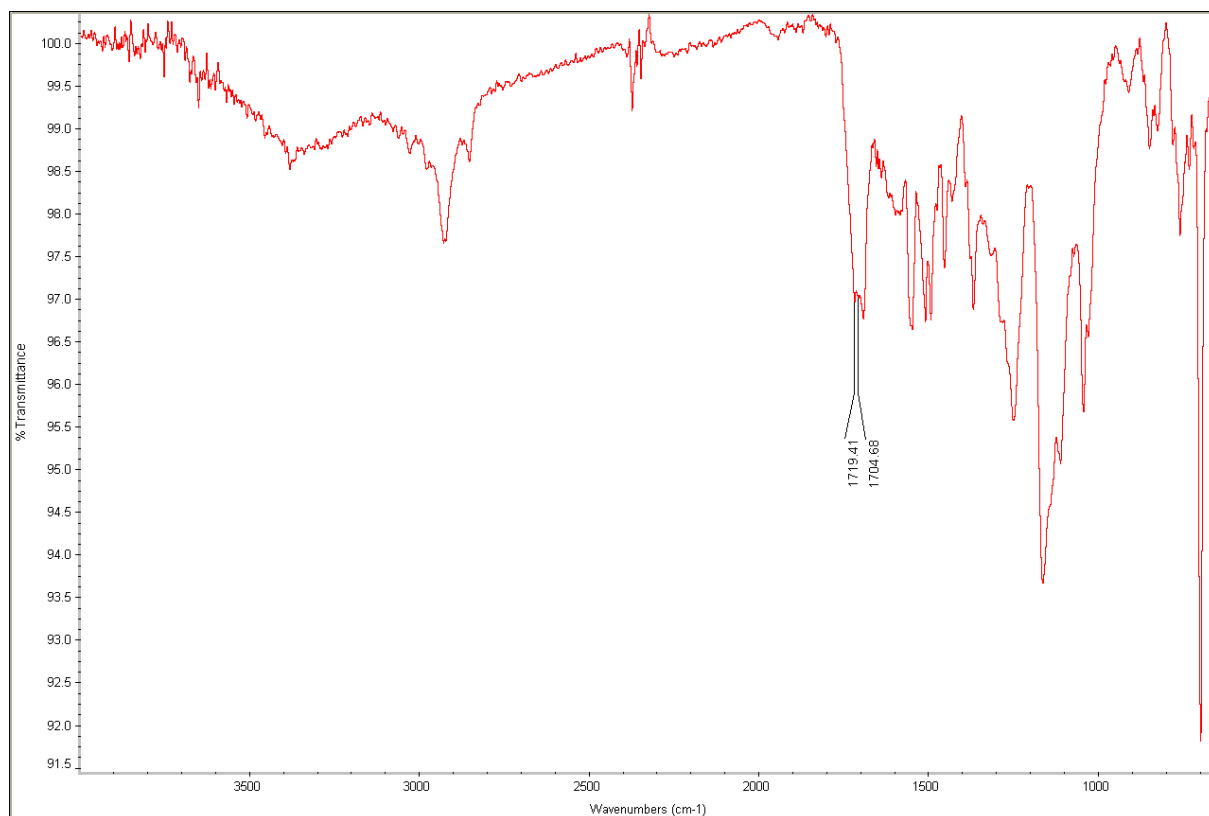

**Figure S4.** FTIR of catalyst **V** after 15 reaction cycles (aza-Henry reaction).

### Used catalyst (Michael reaction)

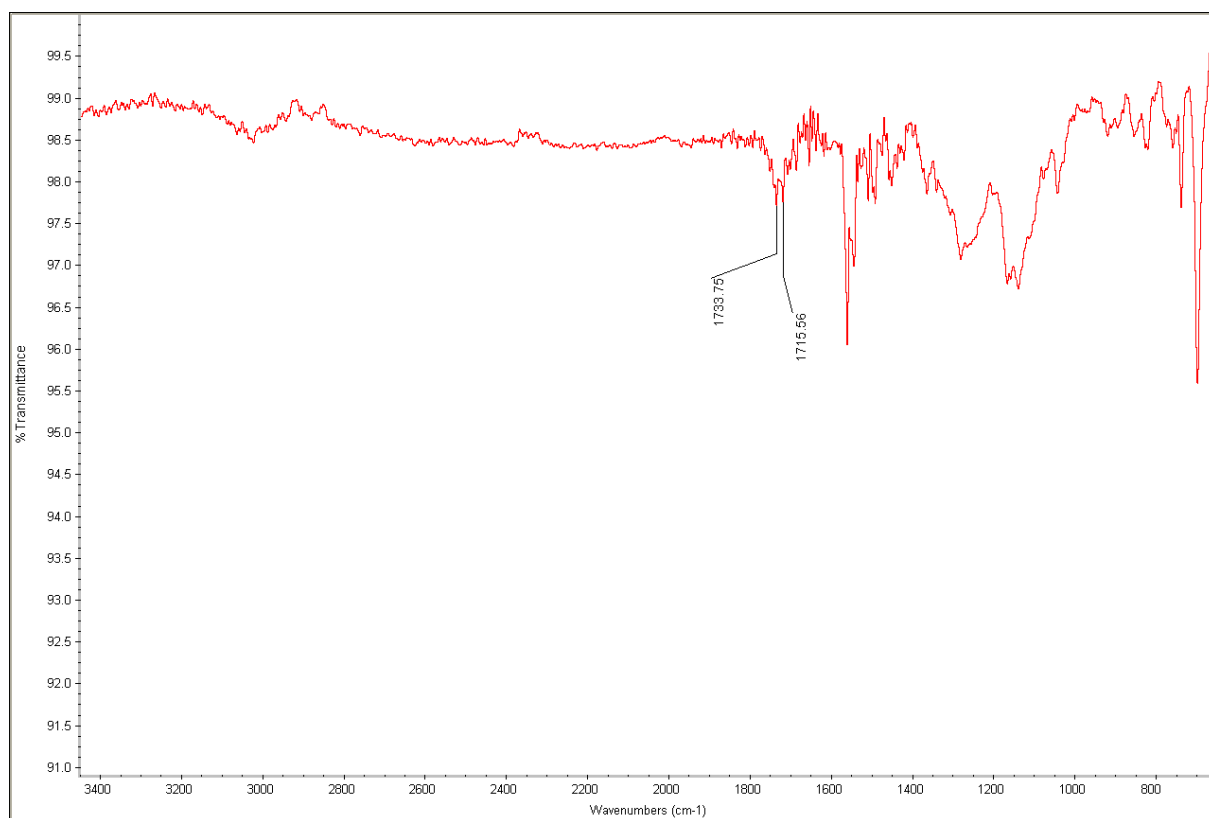

**Figure S5.** FTIR of catalyst **V** after 10 reaction cycles (Michael reaction).



### As-prepared catalyst

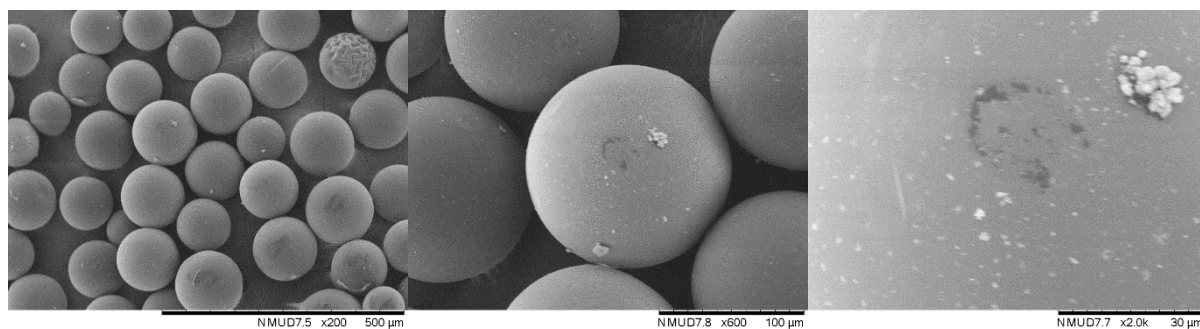

**Figure S6.** SEM images of the as-prepared catalyst **V**.

### Used catalyst (aza-Henry reaction)

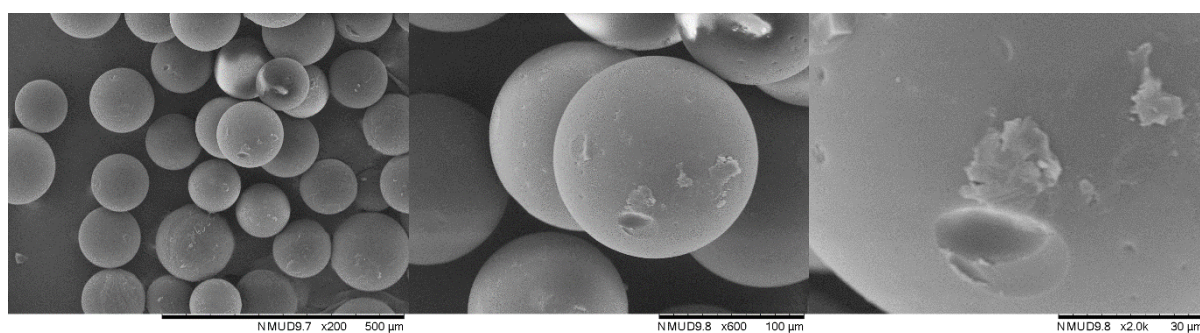

**Figure S7.** SEM images of catalyst **V** after 15 reaction cycles (aza-Henry reaction).

### Used catalyst (Michael reaction)

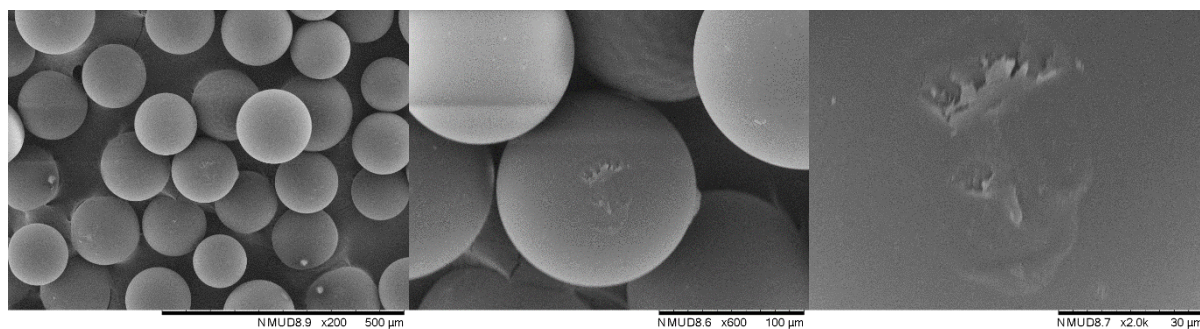

**Figure S8.** SEM images of catalyst **V** after 10 reaction cycles (Michael reaction).

### As-prepared catalyst

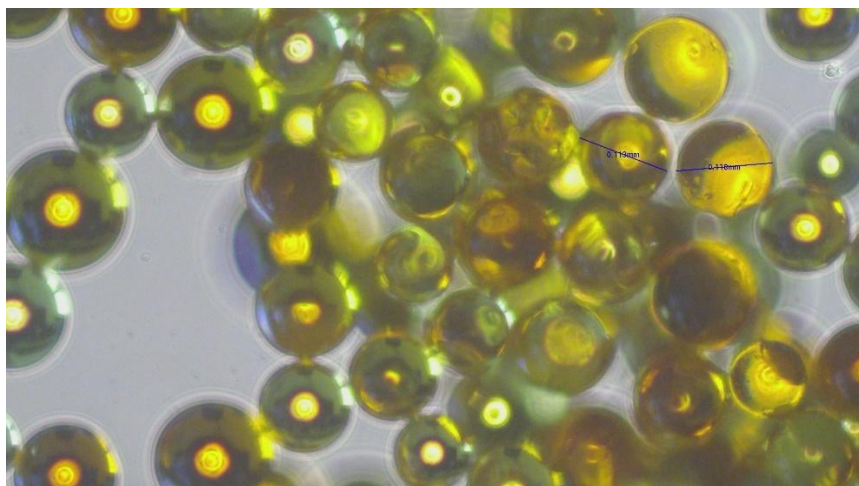

**Figure S9.** Optical microscope image of the as-prepared catalyst **V**.

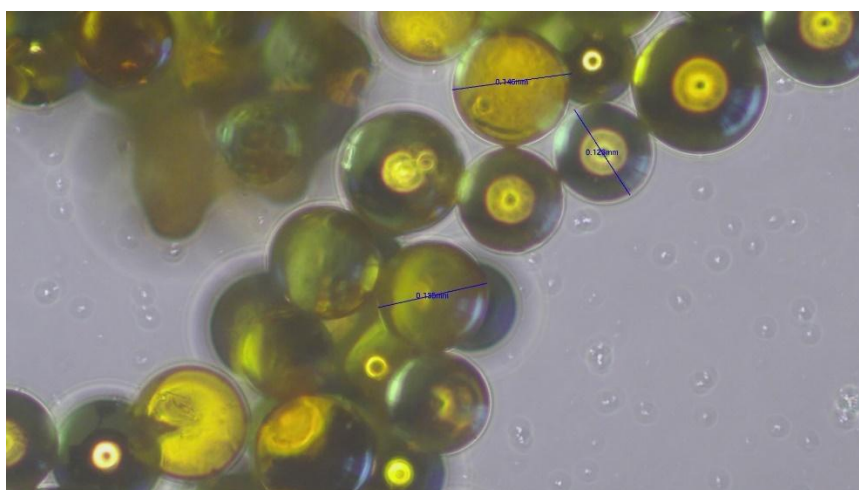

**Figure S10.** Optical microscope image of catalyst **V** after 15 reaction cycles (aza-Henry reaction).

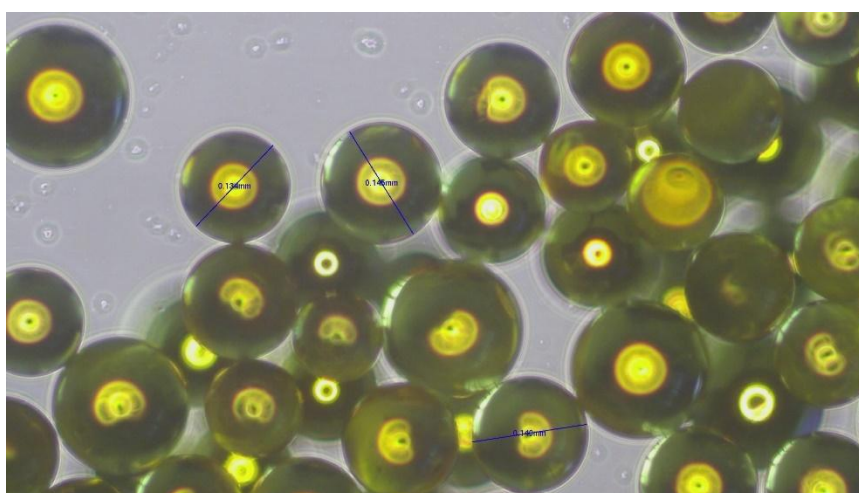

**Figure S11.** Optical microscope image of catalyst **V** after 10 reaction cycles (Michael reaction).

## Reactor setup

All experiments involving the supported catalyst were conducted in filters so that, once the reaction was complete, the product and solvent could be easily separated from the catalyst (Figure S12). Additionally, an orbital shaker was used to stir the reactions, as magnetic stirrers were avoided to prevent mechanical degradation of the polymer-supported catalysts (Figure S13). High and low temperature experiments were carried out as shown (Figure S14).

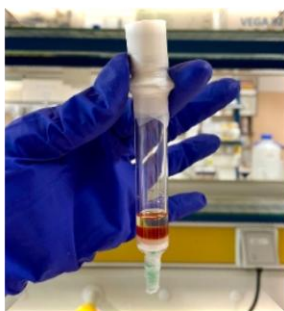

**Figure S12.** The filter where all the tests have been performed

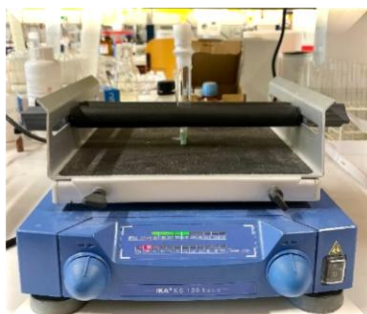

**Figure S13.** Orbital shaker used to stir the reaction at room temperature

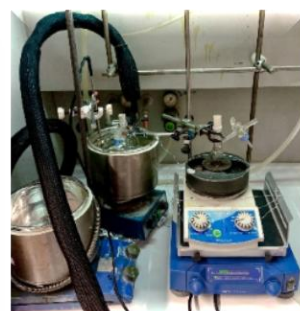

**Figure S14.** The setup for temperature optimization

## Synthesis and characterization of imines **3**

General procedure for the preparation of *N*-Boc imine:

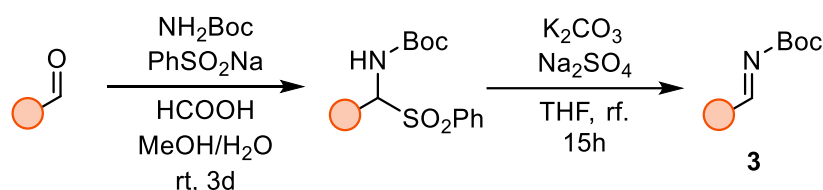

**Step 1,  $\alpha$ -sulfonyl amine:** A reaction mixture was prepared by combining benzaldehyde (1.5 equiv., 3.83 mL, 37.5 mmol), tert-butyl carbamate (1 equiv., 2.93 g, 25 mmol), sodium benzenesulfinate (2 equiv., 8.2 g, 50 mmol) and formic acid (4 equiv., 3.75 mL, 100 mmol) in a solvent mixture of methanol (50 mL) and water (100 mL). The reaction was allowed to stir 3 days at room temperature, during which time the product precipitated as a white solid. It was isolated via Büchner funnel filtration and washed with water and diethyl ether. After drying in vacuum, the product was obtained as a white solid (6.6 g, 76%).

**Step 2, *N*-Boc imine:** A 100 mL round-bottom flask containing potassium carbonate (6.00 equiv., 4.14 g, 30.0 mmol) and sodium sulfate (5.00 equiv., 5 g, 5 mmol) was flame-dried under vacuum and cooled under an inert atmosphere. Subsequently, the corresponding sulfonyl amine (1 equiv., 1.19 g, 5 mmol) was added with dry THF (40 mL). The mixture was refluxed under  $\text{N}_2$  for 15h. After cooling to room temperature, it was filtered and the solvent was evaporated to afford imines **3a-l** as an oil. The appearance of the oil varied in color depending on the nature of the substituent in the starting material. The crude imine was used directly in the step without further purification.<sup>8</sup>

### Tert-butyl (*E*)-benzylidenecarbamate (3a)

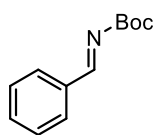

The general procedure was followed to afford 0.46 g (74 %) of the product as a white-yellow liquid. The reported data match the literature.<sup>8</sup>

<sup>1</sup>H NMR (400 MHz, CDCl<sub>3</sub>) δ 8.86 (s, 1H), 7.90 (d, <sup>3</sup>J<sub>HH</sub> = 9.6 Hz, 2H), 7.55 (t, 1H), 7.45 (t, <sup>3</sup>J<sub>HH</sub> = 6.7 Hz, 2H), 1.58 (s, 9H).

<sup>13</sup>C {<sup>1</sup>H} NMR (101 MHz, CDCl<sub>3</sub>) δ 169.7, 162.7, 134.2, 133.6, 130.3, 129.0, 82.4, 28.0.

### Tert-butyl (*E*)-(4-chlorobenzylidene)carbamate (3b)

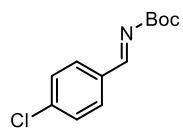

The general procedure was followed to afford 1.16 g (97 %) of the product as a white-yellow solid. The reported data match the literature.<sup>8</sup>

<sup>1</sup>H NMR (400 MHz, CDCl<sub>3</sub>) δ 8.64 (s, 1H), 7.66 (d, <sup>3</sup>J<sub>HH</sub> = 8.6 Hz, 2H), 7.25 (d, <sup>3</sup>J<sub>HH</sub> = 8.5 Hz, 2H), 1.43 (s, 9H).

<sup>13</sup>C {<sup>1</sup>H} NMR (101 MHz, CDCl<sub>3</sub>) δ 167.2, 161.6, 139.0, 132.0, 130.6, 128.6, 81.5, 27.3.

### Tert-butyl (*E*)-(3-chlorobenzylidene)carbamate (3c)

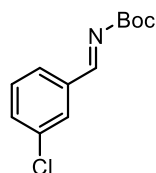

The general procedure was followed to afford 0.50 g (49 %) of the product as a white liquid. The reported data match the literature.<sup>9</sup>

<sup>1</sup>H NMR (400 MHz, CDCl<sub>3</sub>) δ 8.79 (s, 1H), 7.94 (s, 1H), 7.74 (d, <sup>3</sup>J<sub>HH</sub> = 7.8 Hz, 1H), 7.52 (d, <sup>3</sup>J<sub>HH</sub> = 6.9 Hz, 1H), 7.40 (t, <sup>3</sup>J<sub>HH</sub> = 7.8 Hz, 1H), 1.58 (s, 9H).

<sup>13</sup>C {<sup>1</sup>H} NMR (101 MHz, CDCl<sub>3</sub>) δ 167.4, 161.7, 135.4, 134.7, 132.9, 129.8, 128.9, 128.2, 82.2, 27.5.

### Tert-butyl (*E*)-(2-chlorobenzylidene)carbamate (3d)

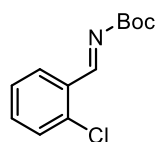

The general procedure was followed to afford 0.75 g (87 %) of the product as a white liquid. The reported data match the literature.<sup>9</sup>

<sup>1</sup>H NMR (400 MHz, CDCl<sub>3</sub>) δ 9.25 (s, 1H), 8.16 (t, <sup>3</sup>J<sub>HH</sub> = 8.0 Hz, 1H), 7.41 (t, 2H), 7.30 (t, <sup>3</sup>J<sub>HH</sub> = 7.8 Hz, 1H), 1.57 (s, 9H).

<sup>13</sup>C {<sup>1</sup>H} NMR (101 MHz, CDCl<sub>3</sub>) δ 165.4, 162.1, 137.6, 134.0, 131.1, 129.9, 128.9, 126.9, 82.4, 27.7.

### Tert-butyl (*E*)-(naphthalen-1-ylmethylene)carbamate (3e)

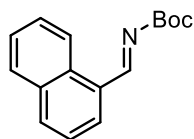

The general procedure was followed to afford 1.26 g (99 %) of the product as a yellow liquid. The reported data match the literature.<sup>9</sup>

<sup>1</sup>H NMR (400 MHz, CDCl<sub>3</sub>) δ 9.53 (s, 1H), 8.93 (d, <sup>3</sup>J<sub>HH</sub> = 8.6 Hz, 1H), 8.16 (d, <sup>3</sup>J<sub>HH</sub> = 7.3 Hz, 1H), 8.02 (d, <sup>3</sup>J<sub>HH</sub> = 8.3 Hz, 1H), 7.89 (d, <sup>3</sup>J<sub>HH</sub> = 8.1 Hz, 1H), 7.63 (t, <sup>3</sup>J<sub>HH</sub> = 7.8 Hz, 1H), 7.54 (d, <sup>3</sup>J<sub>HH</sub> = 8.4 Hz, 2H), 1.64 (s, 9H).

<sup>13</sup>C {<sup>1</sup>H} NMR (101 MHz, CDCl<sub>3</sub>) δ 169.0, 162.9, 134.3, 133.8, 132.0, 131.9, 129.3, 128.9, 128.2, 126.6, 125.2, 124.0, 82.3, 28.1.

### Tert-butyl (*E*)-(naphthalen-2-ylmethylene)carbamate (3f)



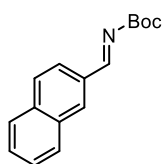

The general procedure was followed to afford 1.16 g (91 %) of the product as a white solid. The reported data match the literature.<sup>10</sup>

**<sup>1</sup>H NMR** (400 MHz, CDCl<sub>3</sub>) δ (s, 1H), 8.21 (d, 1H), 8.03 (d, <sup>3</sup>J<sub>HH</sub> = 8.6 Hz, 1H), 7.83 (t, <sup>3</sup>J<sub>HH</sub> = 13.1 Hz, 3H), 7.50 (d, <sup>3</sup>J<sub>HH</sub> = 14.6 Hz, 2H), 1.60 (s, 9H).

**<sup>13</sup>C {<sup>1</sup>H} NMR** (101 MHz, CDCl<sub>3</sub>) δ 170.2, 163.1, 136.4, 134.5, 133.1, 132.2, 129.6, 129.2, 129.0, 128.3, 127.6, 124.3, 82.6, 28.4.

#### Tert-butyl (E)-(pyridin-3-ylmethylene)carbamate (3g)

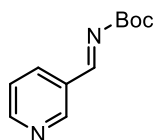

The general procedure was followed to afford 0.98 g (95 %) of the product as an orange liquid. The reported data match the literature.<sup>9</sup>

**<sup>1</sup>H NMR** (400 MHz, CDCl<sub>3</sub>) δ 8.99 (s, 1H), 8.85 (d, <sup>3</sup>J<sub>HH</sub> = 7.8 Hz, 1H), 8.75 (d, <sup>4</sup>J<sub>HH</sub> = 4.8 Hz, 1H), 8.26 (dd, <sup>3</sup>J<sub>HH</sub> = 8.0 Hz, <sup>4</sup>J<sub>HH</sub> = 2.0 Hz, 1H), 7.39 (d, <sup>3</sup>J<sub>HH</sub> = 7.1 Hz, 1H), 1.57 (s, 9H).

**<sup>13</sup>C {<sup>1</sup>H} NMR** (101 MHz, CDCl<sub>3</sub>) δ 166.8, 162.1, 154.0, 152.3, 136.0, 130.0, 124.0, 83.0, 28.0.

#### Tert-butyl (E)-(thiophen-2-ylmethylene)carbamate (3h)

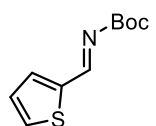

The general procedure was followed to afford 0.92 g (97 %) of the product as a brown liquid. The reported data match the literature.<sup>10</sup>

**<sup>1</sup>H NMR** (400 MHz, CDCl<sub>3</sub>) δ 9.02 (s, 1H), 7.66 (d, <sup>4</sup>J<sub>HH</sub> = 3.9 Hz, 1H), 7.62 (s, 1H), 7.15 – 7.10 (m, 1H), 1.52 (s, 9H).

**<sup>13</sup>C {<sup>1</sup>H} NMR** (101 MHz, CDCl<sub>3</sub>) δ 163.5, 162.2, 140.3, 137.1, 134.2, 128.4, 82.1, 28.0.

#### Tert-butyl (E)-(2-bromobenzylidene)carbamate (3i)

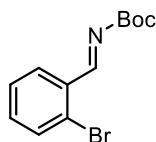

The general procedure was followed to afford 1.29 g (91 %) of the product as a white liquid. The reported data match the literature.<sup>11</sup>

**<sup>1</sup>H NMR** (400 MHz, CDCl<sub>3</sub>) δ 9.15 (s, 1H), 8.12 (t, <sup>3</sup>J<sub>HH</sub> = 9.6 Hz, 1H), 7.56 (t, <sup>3</sup>J<sub>HH</sub> = 9.3 Hz, 1H), 7.32 (d, <sup>3</sup>J<sub>HH</sub> = 9.5 Hz, 2H), 1.55 (s, 9H).

**<sup>13</sup>C {<sup>1</sup>H} NMR** (101 MHz, CDCl<sub>3</sub>) δ 168.2, 162.5, 135.6, 134.7, 133.8, 133.0, 129.8, 128.1, 82.9, 28.3.

#### Tert-butyl (E)-(4-methylbenzylidene)carbamate (3j)

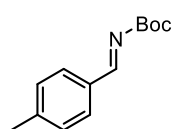

The general procedure was followed to afford 0.42 g (53 %) of the product as a yellow solid. The reported data match the literature.<sup>8</sup>

**<sup>1</sup>H NMR** (400 MHz, CDCl<sub>3</sub>) δ 8.87 (s, 1H), 7.81 (d, <sup>3</sup>J<sub>HH</sub> = 8.3 Hz, 2H), 7.27 (d, <sup>3</sup>J<sub>HH</sub> = 8.1 Hz, 2H), 2.42 (s, 3H), 1.59 (s, 9H).

**<sup>13</sup>C {<sup>1</sup>H} NMR** (101 MHz, CDCl<sub>3</sub>) δ 170.4, 163.2, 145.0, 132.0, 130.8, 130.1, 82.5, 28.4, 22.3.

#### Tert-butyl (E)-(4-(trifluoromethyl)benzylidene)carbamate (3k)

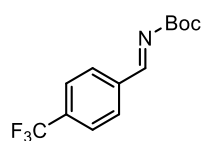

The general procedure was followed to afford 1.29 g (94 %) of the product as a white solid. The reported data match the literature.<sup>8</sup>

**<sup>1</sup>H NMR** (400 MHz, CDCl<sub>3</sub>) δ 8.81 (s, 1H), 7.97 (d, <sup>3</sup>J<sub>HH</sub> = 8.1 Hz, 2H), 7.68 (d, <sup>3</sup>J<sub>HH</sub> = 8.1 Hz, 2H), 1.55 (s, 9H).

**<sup>13</sup>C {<sup>1</sup>H} NMR** (101 MHz, CDCl<sub>3</sub>) δ 167.2 (s), 162.1 (s), 137.2 (s), 134.6 (q), 130.1 (s), 125.8 (s), 82.7 (s), 27.8 (s).

**<sup>19</sup>F {<sup>1</sup>H} NMR** (376 MHz, CDCl<sub>3</sub>) δ -63.19.

### Tert-butyl (*E*)-(furan-2-ylmethylene)carbamate (**3l**)

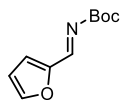

The general procedure was followed to afford 0.77 g (79 %) of the product as a brown liquid. The reported data match the literature.<sup>10</sup>

**<sup>1</sup>H NMR** (400 MHz, CDCl<sub>3</sub>) δ 8.75 (s, 1H), 7.67 (s, 1H), 7.21 (d, <sup>4</sup>J<sub>HH</sub> = 3.6 Hz, 2H), 6.58 (d, <sup>4</sup>J<sub>HH</sub> = 1.9 Hz, 1H), 1.55 (s, 9H).

**<sup>13</sup>C {<sup>1</sup>H} NMR** (101 MHz, CDCl<sub>3</sub>) δ 162.3, 157.6, 150.9, 148.2, 121.4, 113.1, 82.2, 28.0.

## Synthesis and characterization of β-nitro amines **4**

**General procedure for the enantioselective aza-Henry reaction:**

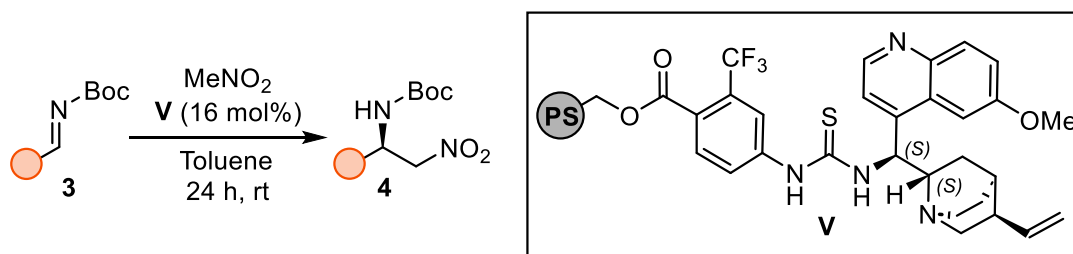

In a filtered tube were added a solution of the imine in toluene (1 equiv., 1 mL, 0.2 mmol, 0.2 M), the supported-catalyst (0.16 equiv., *f* = 0.7 mmol/g, 44.0 mg, 0.032 mmol) and nitromethane (5 equiv., 53 μL, 1 mmol). The tube was shaken at room temperature overnight. Afterward, the reaction mixture was filtered off and the supported catalyst was washed three times with DCM (2 mL). After evaporating the solvent, the reaction crude was purified by chromatography in hexane/EtOAc to afford aza-Henry adducts **4a-l**. Racemic products **4** were synthesized using trimethylamine (10 mol%) as the catalyst.<sup>12</sup>

### Tert-butyl (*R*)-(2-nitro-1-phenylethyl)carbamate (**4a**)

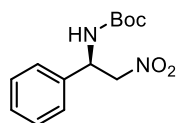

The general procedure was followed to afford 50.0 mg (94%) of the product as a white solid. The reported data match the literature.<sup>2</sup>

**<sup>1</sup>H NMR** (400 MHz, CDCl<sub>3</sub>) δ 7.41 – 7.29 (m, 5H), 5.42 – 5.19 (m, 2H), 4.85 (s, 1H), 4.71 (dd, <sup>3</sup>J<sub>HH</sub> = 12.6 Hz, <sup>3</sup>J<sub>HH</sub> = 5.6 Hz, 1H), 1.44 (s, 9H).

**<sup>13</sup>C {<sup>1</sup>H} NMR** (101 MHz, CDCl<sub>3</sub>) δ 154.9, 137.0, 129.4, 128.9, 126.5, 80.9, 79.0, 53.1, 28.4.

The absolute configuration of **4a** was determined by comparing the HPLC data with the literature:

**HPLC (chiral):** Chiralpak-IA, n-heptane/EtOH 98:2, 1.0 mL/min, 40 °C, detection at 230 nm. Residence time: 18.8 min (major), 20.7 (minor). 91:9 er.

**Lit. for (*R*) isomer HPLC (chiral):** Chiralpak IA, Hexanes/*i*-PrOH 90:10, 1.0 mL/min, temperature not specified, detection at 210 nm. Residence time: 12.0 min (major), 13.0 (minor).

The accumulated turnover number (TON) was calculated using the average yield of all the recycling tests for compound **4a**.

$$\text{TON} = \frac{\text{mmoles limiting reactant}}{\text{mmoles catalyst}} \times \text{yield} = \frac{3.0}{0.032} \times 0.89 = 83.4$$

**Tert-butyl (R)-(1-(4-chlorophenyl)-2-nitroethyl)carbamate (4b)**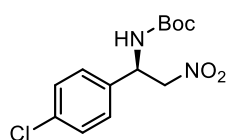

The general procedure was followed to afford 55.0 mg (93%) of the product as a white solid. The reported data match the literature.<sup>2</sup>

<sup>1</sup>H NMR (400 MHz, CDCl<sub>3</sub>) δ 7.38 (d, <sup>3</sup>J<sub>HH</sub> = 8.5 Hz, 2H), 7.27 (, <sup>3</sup>J<sub>HH</sub> = 9.0 Hz, 2H), 5.37 (s, 2H), 4.84 (s, 1H), 4.71 (d, <sup>3</sup>J<sub>HH</sub> = 7.6 Hz, 1H), 1.46 (s, 9H).

<sup>13</sup>C {<sup>1</sup>H} NMR (101 MHz, CDCl<sub>3</sub>) δ 154.8, 135.6, 134.8, 131.1, 129.5, 127.9, 78.8, 52.4, 28.4.

**HPLC (chiral):** Chiralpak-IA, n-heptane/EtOH 95:5, 1.0 mL/min, 40 °C, detection at 254 nm.

Residence time: 10.65 min (major), 12.52 (minor). 86:14 er.

**Tert-butyl (R)-(1-(3-chlorophenyl)-2-nitroethyl)carbamate (4c)**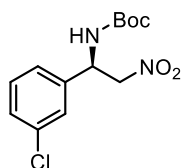

The general procedure was followed to afford 56.0 mg (93%) of the product as a white solid. The reported data match the literature.<sup>13</sup>

<sup>1</sup>H NMR (400 MHz, CDCl<sub>3</sub>) δ 7.41 (d, <sup>2</sup>J<sub>HH</sub> = 4.4 Hz, 1H), 7.36 (d, <sup>2</sup>J<sub>HH</sub> = 4.4 Hz, 1H), 7.30 (d, <sup>3</sup>J<sub>HH</sub> = 5.0 Hz, 2H), 5.73 (s, 1H), 4.88 - 4.80 (m, 1H), 1.43 (s, 9H), 1.25 (s, 2H).

<sup>13</sup>C {<sup>1</sup>H} NMR (101 MHz, CDCl<sub>3</sub>) δ 132.8, 130.5, 130.2, 130.1, 128.2, 127.7, 83.6, 50.8, 29.9, 28.4.

**HPLC (chiral):** Chiralpak-IA, n-heptane/EtOH 99:1, 1.0 mL/min, 40 °C, detection at 230 nm.

Residence time: 15.12 min (major), 16.77 (minor). 92:8 er.

**Tert-butyl (R)-(1-(2-chlorophenyl)-2-nitroethyl)carbamate (4d)**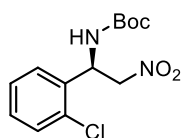

The general procedure was followed to afford 56.0 mg (93%) of the product as a white solid. The reported data match the literature.<sup>14</sup>

<sup>1</sup>H NMR (400 MHz, CDCl<sub>3</sub>) δ 7.40 (dd, <sup>3</sup>J<sub>HH</sub> = 5.9, <sup>4</sup>J<sub>HH</sub> = 3.4 Hz, 1H), 7.37 – 7.33 (m, 1H), 7.29 (dd, <sup>3</sup>J<sub>HH</sub> = 5.9, <sup>4</sup>J<sub>HH</sub> = 3.6 Hz, 2H), 5.73 (s, 2H), 4.94 – 4.68 (m, 2H), 1.43 (s, 9H).

<sup>13</sup>C {<sup>1</sup>H} NMR (101 MHz, CDCl<sub>3</sub>) δ 154.7, 134.4, 132.7, 130.4, 130.0, 129.8, 128.2, 127.7, 80.9, 51.7, 28.4.

**HPLC (chiral):** Chiralpak-IA, n-heptane/EtOH 98:2, 1.0 mL/min, 40 °C, detection at 254 nm.

Residence time: 13.94 min (major), 14.60 (minor). 86:14 er.

**Tert-butyl (R)-(1-(naphthalen-1-yl)-2-nitroethyl)carbamate (4e)**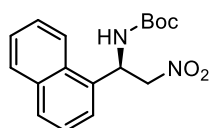

The general procedure was followed to afford 57.0 mg (90%) of the product as a white solid. The reported data match the literature.<sup>2</sup>

<sup>1</sup>H NMR (400 MHz, CDCl<sub>3</sub>) δ 8.12 (d, <sup>3</sup>J<sub>HH</sub> = 8.6 Hz, 1H), 7.91 (d, <sup>3</sup>J<sub>HH</sub> = 9.9 Hz, 1H), 7.86 (dd, <sup>3</sup>J<sub>HH</sub> = 6.8, <sup>4</sup>J<sub>HH</sub> = 2.8 Hz, 1H), 7.62 (t, 1H), 7.55 (t, 1H), 7.46 (t, 2H), 6.28 (d,

<sup>4</sup>J<sub>HH</sub> = 6.6 Hz, 1H), 5.30 (s, 1H), 4.91 (s, 2H), 1.44 (s, 9H).

<sup>13</sup>C {<sup>1</sup>H} NMR (101 MHz, CDCl<sub>3</sub>) δ 154.8, 134.2, 132.7, 130.4, 129.7, 129.4, 127.4, 126.4, 125.4, 123.4, 122.3, 80.9, 78.4, 49.4, 28.4.

**HPLC (chiral):** Chiralpak-IA, n-heptane/EtOH 99:1, 1.0 mL/min, 40 °C, detection at 254 nm.

Residence time: 15.45 min (major), 19.64 (minor). 88:12 er.

**Tert-butyl (R)-(1-(naphthalen-2-yl)-2-nitroethyl)carbamate (4f)**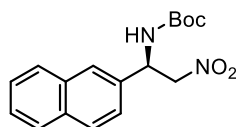

The general procedure was followed to afford 60.0 mg (95%) of the product as a white solid. The reported data match the literature.<sup>13</sup>

**<sup>1</sup>H NMR** (400 MHz, CDCl<sub>3</sub>) δ 7.85 (t, 3H), 7.76 (s, 1H), 7.51 (d, <sup>3</sup>J<sub>HH</sub> = 9.5 Hz, 2H), 7.40 (dd, <sup>3</sup>J<sub>HH</sub> = 8.5 Hz, <sup>4</sup>J<sub>HH</sub> = 2.0 Hz, 1H), 5.48 (d, 2H), 4.93 (s, 1H), 4.80 (dd, <sup>3</sup>J<sub>HH</sub> =

12.7 Hz, <sup>4</sup>J<sub>HH</sub> = 5.7 Hz, 1H), 1.45 (s, 9H).

**<sup>13</sup>C {<sup>1</sup>H} NMR** (101 MHz, CDCl<sub>3</sub>) δ 154.8, 134.2, 133.3, 133.2, 129.3, 128.1, 127.7, 126.8, 126.6, 125.6, 123.8, 80.8, 78.9, 53.1, 28.3.

**HPLC (chiral):** Chiralpak-IA, n-heptane/EtOH 99:1, 1.0 mL/min, 40 °C, detection at 254 nm.

Residence time: 20.31 min (major), 24.57 (minor). 89:11 er.

**Tert-butyl (R)-(2-nitro-1-(pyridin-3-yl)ethyl)carbamate (4g)**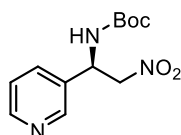

The general procedure was followed to afford 40.0 mg (75%) of the product as a white solid. The reported data match the literature.<sup>14</sup>

**<sup>1</sup>H NMR** (400 MHz, CDCl<sub>3</sub>) δ 8.60 (d, <sup>3</sup>J<sub>HH</sub> = 8.0 Hz, 2H), 7.65 (d, <sup>3</sup>J<sub>HH</sub> = 8.0 Hz, 1H), 7.32 (dd, <sup>3</sup>J<sub>HH</sub> = 8.0 Hz, <sup>4</sup>J<sub>HH</sub> = 4.9 Hz, 1H), 5.42 (d, <sup>4</sup>J<sub>HH</sub> = 5.7 Hz, 2H), 4.89 (s, 1H), 4.75

(dd, <sup>3</sup>J<sub>HH</sub> = 13.3 Hz, <sup>4</sup>J<sub>HH</sub> = 4.8 Hz, 1H), 1.44 (s, 9H).

**<sup>13</sup>C {<sup>1</sup>H} NMR** (101 MHz, CDCl<sub>3</sub>) δ 154.8, 150.2, 148.3, 134.2, 132.9, 124.0, 81.3, 78.4, 51.0, 28.4.

**HPLC (chiral):** Chiralpak-IA, n-heptane/EtOH 90:10, 1.0 mL/min, 40 °C, detection at 210 nm.

Residence time: 10.90 min (major), 13.41 (minor). 94:6 er.

**Tert-butyl (R)-(2-nitro-1-(thiophen-2-yl)ethyl)carbamate (4h)**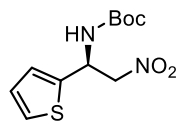

The general procedure was followed to afford 48.0 mg (90%) of the product as a white solid. The reported data match the literature.<sup>15</sup>

**<sup>1</sup>H NMR** (400 MHz, CDCl<sub>3</sub>) δ 7.27 (dd, <sup>4</sup>J<sub>HH</sub> = 5.0, <sup>4</sup>J<sub>HH</sub> = 1.4 Hz, 1H), 6.98 (dd, <sup>3</sup>J<sub>HH</sub> = 9.1 Hz, <sup>4</sup>J<sub>HH</sub> = 4.1 Hz, 2H), 5.66 – 5.58 (m, 1H), 5.33 (s, 1H), 4.89 (s, 1H), 4.75 (dd, <sup>3</sup>J<sub>HH</sub> = 12.9 Hz, <sup>4</sup>J<sub>HH</sub> = 5.6 Hz, 1H), 1.45 (s, 9H).

**<sup>13</sup>C {<sup>1</sup>H} NMR** (101 MHz, CDCl<sub>3</sub>) δ 155.0, 140.5, 127.8, 126.1, 125.7, 81.4, 79.1, 49.3, 28.7.

**HPLC (chiral):** Chiralpak-IA, n-heptane/EtOH 99:1, 1.0 mL/min, 40 °C, detection at 254 nm.

Residence time: 20.43 min (major), 22.73 (minor). 88:12 er.

**Tert-butyl (R)-(1-(2-bromophenyl)-2-nitroethyl)carbamate (4i)**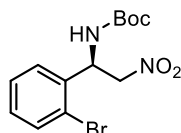

The general procedure was followed to afford 54.0 mg (80%) of the product as a white solid. The reported data match the literature.<sup>16</sup>

**<sup>1</sup>H NMR** (400 MHz, CDCl<sub>3</sub>) δ 7.59 (d, <sup>3</sup>J<sub>HH</sub> = 7.6 Hz, 1H), 7.36 – 7.32 (m, 2H), 7.23 – 7.18 (m, 1H), 5.73 (s, 2H), 4.91 – 4.67 (m, 2H), 1.43 (s, 9H).

**<sup>13</sup>C {<sup>1</sup>H} NMR** (101 MHz, CDCl<sub>3</sub>) δ 154.64, 136.06, 133.72, 130.56, 130.24, 128.24, 128.04, 122.82, 80.92, 52.61, 28.36.

**HPLC (chiral):** Chiralpak-IA, n-heptane/EtOH 98:2, 1.0 mL/min, 40 °C, detection at 254 nm.

Residence time: 15.78 min (minor), 25.48 (major). 10:90 er.



### Tert-butyl (R)-(1-(2-bromophenyl)-2-nitroethyl)carbamate (4j)

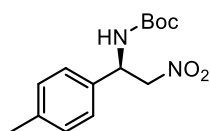

The general procedure was followed to afford 30.0 mg (54%) of the product as a white solid. The reported data match the literature.<sup>14</sup>

**<sup>1</sup>H NMR** (400 MHz, Acetone-d<sub>6</sub>) δ 7.36 (d, <sup>3</sup>J<sub>HH</sub> = 8.1 Hz, 2H), 7.20 (d, <sup>3</sup>J<sub>HH</sub> = 7.9 Hz, 2H), 6.80 (s, 1H), 5.44 (d, <sup>3</sup>J<sub>HH</sub> = 7.4 Hz, 1H), 4.87 (d, <sup>3</sup>J<sub>HH</sub> = 8.1 Hz, 2H), 2.31 (s, 3H),

1.38 (s, 9H).

**<sup>13</sup>C {<sup>1</sup>H} NMR** (101 MHz, Acetone-d<sub>6</sub>) δ 192.6, 155.9, 138.7, 136.7, 130.3, 127.7, 79.8, 53.8, 28.6, 21.2.

**HPLC (chiral):** Chiralpak-IA, n-heptane/EtOH 97:3, 1.0 mL/min, 40 °C, detection at 254 nm.

Residence time: 11.33 min (major), 12.76 (minor). 91:9 er.

### Tert-butyl (R)-(2-nitro-1-(4-(trifluoromethyl)phenyl)ethyl)carbamate (4k)

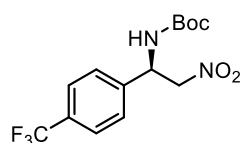

The general procedure was followed to afford 44.0 mg (66%) of the product as a white solid. The reported data match the literature.<sup>2</sup>

**<sup>1</sup>H NMR** (400 MHz, CDCl<sub>3</sub>) δ 7.64 (d, <sup>3</sup>J<sub>HH</sub> = 8.4 Hz, 2H), 7.45 (d, <sup>3</sup>J<sub>HH</sub> = 8.4 Hz, 2H), 5.44 (s, 2H), 4.85 (s, 1H), 4.74 (s, 1H), 1.44 (s, 9H).

**<sup>13</sup>C {<sup>1</sup>H} NMR** (101 MHz, CDCl<sub>3</sub>) δ 154.7(s), 141.1 (s), 131.1 (s), 126.9 (s), 126.3 (q, <sup>2</sup>J<sub>HH</sub> = 4.0 Hz), 126.3 (s), 81.2 (s), 78.7 (s), 52.5 (s), 28.3 (s).

**<sup>19</sup>F {<sup>1</sup>H} NMR** (376 MHz, CDCl<sub>3</sub>) δ -62.78.

**HPLC (chiral):** Chiralpak-IA, n-heptane/EtOH 97:3, 1.0 mL/min, 40 °C, detection at 254 nm.

Residence time: 13.45 min (major), 15.29 (minor). 62:38 er.

### Tert-butyl (R)-(1-(furan-2-yl)-2-nitroethyl)carbamate (4l)

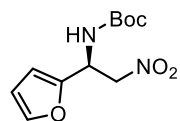

The general procedure was followed to afford 38.0 mg (75%) of the product as a white solid. The reported data match the literature.<sup>2</sup>

**<sup>1</sup>H NMR** (400 MHz, CDCl<sub>3</sub>) δ 7.38 (s, 1H), 6.32 (dd, <sup>3</sup>J<sub>HH</sub> = 13.0 Hz, <sup>4</sup>J<sub>HH</sub> = 2.6 Hz, 2H), 5.51-5.22 (m, 2H), 4.83 (s, 1H), 4.72 (dd, <sup>3</sup>J<sub>HH</sub> = 12.9 Hz, <sup>4</sup>J<sub>HH</sub> = 5.8 Hz, 1H), 1.45 (s, 9H).

**<sup>13</sup>C {<sup>1</sup>H} NMR** (101 MHz, CDCl<sub>3</sub>) δ 154.8, 149.6, 143.0, 110.8, 107.9, 81.0, 76.7, 47.3, 28.4.

**HPLC (chiral):** Chiralpak-IA, n-heptane/EtOH 98:2, 1.0 mL/min, 40 °C, detection at 254 nm.

Residence time: 15.03 min (minor), 20.16 (major). 37:63 er.

## Synthesis and characterization of Michael adducts 6

### General procedure for the enantioselective Michael addition:

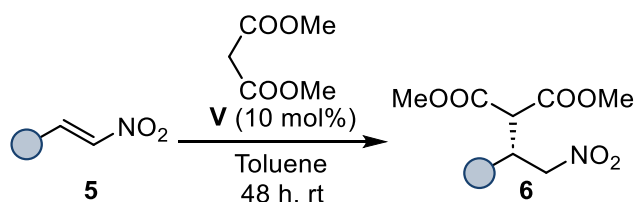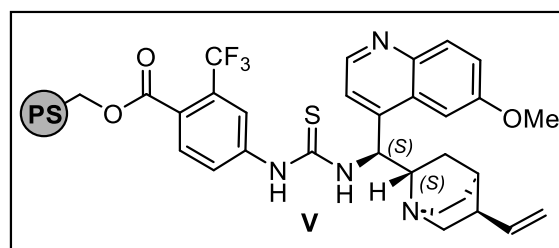

A solution of β-Nitrostyrene **5a** (1 equiv., 74.5 mg, 0.5 mmol) and dimethyl malonate (2 equiv., 114 μL, 1.0 mmol) in toluene (1.0 mL, 1 M) was added to a fritted tube containing the catalyst **V** (0.1 equiv., 74 mg, 0.05 mmol). The tube was then closed with a rubber septum and shaken at room temperature for 2 days. The reaction mixture was filtered off and the supported catalyst was washed three times with

DCM (2 mL). After evaporating the solvent, the reaction crude was purified by chromatography in Hexanes/EtOAc to afford Michael adduct **6a**. Racemic products **6** were synthesized using trimethylamine (10 mol%) as the catalyst.

**(S)-dimethyl 2-(2-nitro-1-phenylethyl)malonate (6a)**

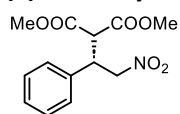

The general procedure was followed to afford 116.0 mg (83%) of the product as a yellow solid. The reported data match the literature.<sup>17</sup>

<sup>1</sup>H NMR (400 MHz, CDCl<sub>3</sub>) δ 7.37 – 7.19 (m, 5H), 4.99 – 4.79 (m, 2H), 4.29 – 4.19 (m, 1H), 3.86 (d, <sup>3</sup>J<sub>HH</sub> = 9.0 Hz, 1H), 3.76 (s, 3H), 3.56 (s, 3H).

<sup>13</sup>C {<sup>1</sup>H} NMR (101 MHz, CDCl<sub>3</sub>) δ 168.0, 167.4, 136.3, 129.2, 128.6, 128.0, 77.5, 54.9, 53.2, 53.0, 43.1.

**HPLC (chiral):** Chiralpak-IA, n-heptane/EtOH 99:1, 1.0 mL/min, 40 °C, detection at 254 nm.

Residence time: 18.5 min (major), 26.8 (minor). 90:10 er.

The accumulated turnover number (TON) was calculated using the average yield of all the recycling tests for compound **6a**.

$$\text{TON} = \frac{\text{mmoles limiting reactant}}{\text{mmoles catalyst}} \times \text{yield} = \frac{5.0}{0.05} \times 0.61 = 61.0$$

**(S)-dimethyl 2-(1-(4-fluorophenyl)-2-nitroethyl)malonate (6b)**

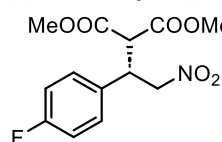

The general procedure was followed to afford 135.0 mg (90 %) of the product as a yellow solid. The reported data match the literature.<sup>18</sup>

<sup>1</sup>H NMR (400 MHz, CDCl<sub>3</sub>) δ 7.24 – 7.19 (m, 2H), 7.01 (t, <sup>3</sup>J<sub>HH</sub> = 8.6 Hz, 2H), 4.93 – 4.80 (m, 2H), 4.26 – 4.20 (m, 1H), 3.82 (d, <sup>3</sup>J<sub>HH</sub> = 9.1 Hz, 1H), 3.76 (s, 3H), 3.57 (s, 3H).

<sup>13</sup>C {<sup>1</sup>H} NMR (101 MHz, CDCl<sub>3</sub>) δ 168.1, 167.6, 164.2, 161.7, 130.2, 130.1 (d, <sup>3</sup>J<sub>HH</sub> = 8.4 Hz), 116.6 (d, <sup>3</sup>J<sub>HH</sub> = 21.4 Hz), 116.4, 55.1, 53.5, 53.3, 42.7.

<sup>19</sup>F NMR (376 MHz, CDCl<sub>3</sub>) δ -113.2.

**HPLC (chiral):** Chiralpak-IA, n-heptane/EtOH 99:1, 1.0 mL/min, 40 °C, detection at 254 nm.

Residence time: 26.6 min (major), 34.4 (minor). 92:8 er.

**(S)-dimethyl 2-(1-(4-chlorophenyl)-2-nitroethyl)malonate (6c)**

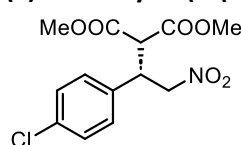

The general procedure was followed to afford 0.140 g (89%) of the product as a yellow solid. The reported data match the literature.<sup>3</sup>

<sup>1</sup>H NMR (400 MHz, CDCl<sub>3</sub>) δ 7.25 (d, <sup>3</sup>J<sub>HH</sub> = 8.6 Hz, 2H), 7.16 (d, <sup>3</sup>J<sub>HH</sub> = 8.8 Hz, 2H), 4.91 – 4.77 (m, 2H), 4.23 – 4.15 (m, 1H), 3.81 (d, <sup>3</sup>J<sub>HH</sub> = 9.1 Hz, 1H), 3.69 (s, 3H), 3.51 (s, 3H).

<sup>13</sup>C {<sup>1</sup>H} NMR (101 MHz, CDCl<sub>3</sub>) δ 167.6, 167.0, 134.7, 134.1, 129.3, 129.1, 77.1, 54.4, 52.9, 52.8, 42.3.

**HPLC (chiral):** Chiralpak-IA, n-heptane/EtOH 99:1, 1.0 mL/min, 40 °C, detection at 254 nm.

Residence time: 30.4 min (major), 36.9 (minor). 90:10 er.

The absolute configuration of **6c** was determined by comparing the HPLC data with the literature:

**HPLC (chiral):** Chiralpak-OD-H, n-heptane/EtOH 95:5, 1.0 mL/min, 40 °C, detection at 254 nm.

Residence time: 17.1 min (major), 20.3 (minor). 91:9 er.

**Lit. for (S) isomer HPLC (chiral):** Chiralcel-OD-H, Hexanes/i-PrOH 70:30, 1.0 mL/min, temperature not specified, detection at 220 nm.

Residence time: 10.2 min (major), 13.6 (minor).

**(S)-dimethyl 2-(1-(4-bromophenyl)-2-nitroethyl)malonate (6d)**

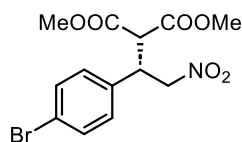

The general procedure was followed to afford 0.142 g (80%) of the product as a yellow solid. The reported data match the literature.<sup>18</sup>

<sup>1</sup>H NMR (400 MHz, CDCl<sub>3</sub>) δ 7.45 (d, <sup>3</sup>J<sub>HH</sub> = 8.0 Hz, 2H), 7.12 (d, <sup>3</sup>J<sub>HH</sub> = 8.0 Hz, 2H), 4.97 – 4.77 (m, 2H), 4.28 – 4.13 (m, 1H), 3.82 (d, <sup>3</sup>J<sub>HH</sub> = 9.0 Hz, 1H), 3.76 (s, 3H),

3.59 (s, 3H).

<sup>13</sup>C {<sup>1</sup>H} NMR (101 MHz, CDCl<sub>3</sub>) δ 167.7, 167.2, 135.3, 132.3, 129.7, 122.7, 77.2, 54.6, 53.3, 53.1, 42.5.

**HPLC (chiral):** Chiralpak-IA, n-heptane/EtOH 99:1, 1.0 mL/min, 40 °C, detection at 254 nm.

Residence time: 32.9 min (major), 39.9 (minor). 92:8 er.

**(S)-dimethyl 2-(1-(4-cyanophenyl)-2-nitroethyl)malonate (6e)**

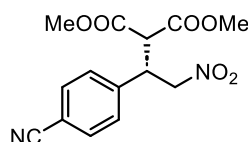

The general procedure was followed to afford 0.097 g (64%) of the product as a yellow solid. The reported data match the literature.<sup>19</sup>

<sup>1</sup>H NMR (400 MHz, CDCl<sub>3</sub>) δ 7.64 (d, <sup>3</sup>J<sub>HH</sub> = 8.1 Hz, 2H), 7.38 (d, <sup>3</sup>J<sub>HH</sub> = 8.1 Hz, 2H), 5.01 – 4.82 (m, 2H), 4.37 – 4.22 (m, 1H), 3.85 (d, <sup>3</sup>J<sub>HH</sub> = 8.8 Hz, 1H), 3.77 (s,

3H), 3.60 (s, 3H).

<sup>13</sup>C {<sup>1</sup>H} NMR (101 MHz, CDCl<sub>3</sub>) δ 167.5, 166.9, 141.7, 132.9, 129.0, 118.2, 112.8, 76.8, 54.3, 53.4, 53.2, 42.9.

**HPLC (chiral):** Chiralpak-IC, n-heptane/EtOH 97:3, 1.0 mL/min, 40 °C, detection at 254 nm.

Residence time: 61.6 min (major), 73.4 (minor). 88:12 er.

**(S)-dimethyl 2-(2-nitro-1-(p-tolyl)ethyl)malonate (6f)**

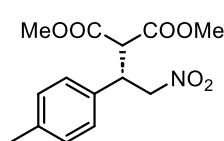

The general procedure was followed to afford 0.095 g (64%) of the product as a yellow solid. The reported data match the literature.<sup>17</sup>

<sup>1</sup>H NMR (400 MHz, CDCl<sub>3</sub>) δ 7.18 – 7.01 (m, 4H), 4.99 – 4.76 (m, 2H), 4.29 – 4.10 (m, 1H), 3.84 (d, <sup>3</sup>J<sub>HH</sub> = 9.0 Hz, 1H), 3.75 (s, 3H), 3.57 (s, 3H), 2.30 (s, 3H).

<sup>13</sup>C {<sup>1</sup>H} NMR (101 MHz, CDCl<sub>3</sub>) δ 168.0, 167.4, 138.3, 133.1, 129.8, 127.8, 77.7, 54.9, 53.2, 52.9, 42.7, 21.2.

**HPLC (chiral):** Chiralpak-IA, n-heptane/EtOH 99:1, 1.0 mL/min, 40 °C, detection at 254 nm.

Residence time: 16.1 min (major), 19.8 (minor). 84:16 er.

**(S)-dimethyl 2-(1-(4-methoxyphenyl)-2-nitroethyl)malonate (6g)**

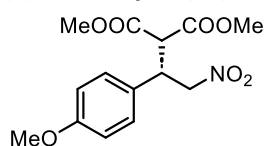

The general procedure was followed to afford 0.097 g (62%) of the product as a yellow liquid. The reported data match the literature.<sup>17</sup>

<sup>1</sup>H NMR (400 MHz, CDCl<sub>3</sub>) δ 7.14 (d, <sup>3</sup>J<sub>HH</sub> = 8.1 Hz, 2H), 6.83 (d, <sup>3</sup>J<sub>HH</sub> = 8.1 Hz, 2H), 4.96 – 4.71 (m, 2H), 4.27 – 4.06 (m, 1H), 3.82 (d, <sup>3</sup>J<sub>HH</sub> = 9.0 Hz, 1H), 3.80 –

3.68 (m, 6H), 3.57 (s, 3H).

<sup>13</sup>C {<sup>1</sup>H} NMR (101 MHz, CDCl<sub>3</sub>) δ 168.0, 167.4, 159.6, 129.1, 128.0, 114.5, 77.8, 55.3, 55.0, 53.1, 53.0, 42.4.

**HPLC (chiral):** Chiralpak-IC, n-heptane/EtOH 97:3, 1.0 mL/min, 40 °C, detection at 254 nm.

Residence time: 21.3 min (major), 25.0 (minor). 91:9 er.

**(S)-dimethyl 2-(1-(4-hydroxyphenyl)-2-nitroethyl)malonate (6h)**

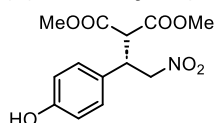

The general procedure was followed to afford 0.112 g (76%) of the product as a yellow solid. The reported data match the literature.<sup>20</sup>

<sup>1</sup>H NMR (400 MHz, CDCl<sub>3</sub>) δ 7.08 (d, <sup>3</sup>J<sub>HH</sub> = 8.2 Hz, 2H), 6.73 (d, <sup>3</sup>J<sub>HH</sub> = 8.0 Hz, 2H), 5.19 (s, 1H), 4.98 – 4.71 (m, 2H), 4.25 – 4.11 (m, 1H), 3.82 (d, <sup>3</sup>J<sub>HH</sub> = 9.2 Hz, 1H), 3.76 (s, 3H), 3.57 (s, 3H).

<sup>13</sup>C {<sup>1</sup>H} NMR (101 MHz, CDCl<sub>3</sub>) δ 168.0, 167.6, 155.8, 129.4, 128.0, 116.1, 77.8, 55.0, 53.2, 53.1, 42.45.

**HPLC (chiral):** Chiralpak-IC, n-heptane/EtOH 97:3, 1.0 mL/min, 40 °C, detection at 254 nm.  
Residence time: 48.1 min (major), 51.5 (minor). 88:12 er.

## Chiral HPLC chromatograms of 4

### Tert-butyl (R)-(2-nitro-1-phenylethyl)carbamate (4a)

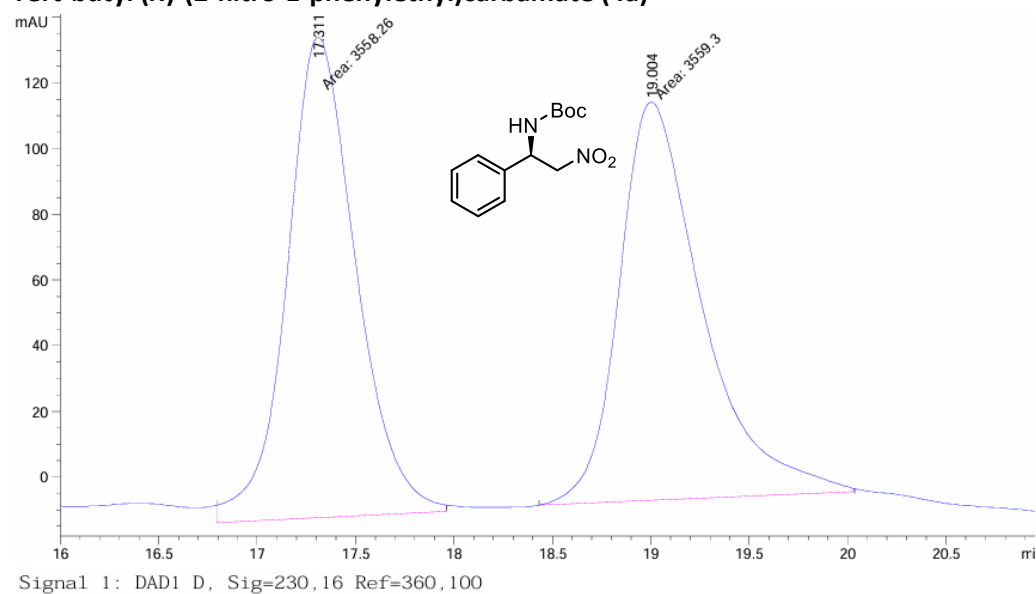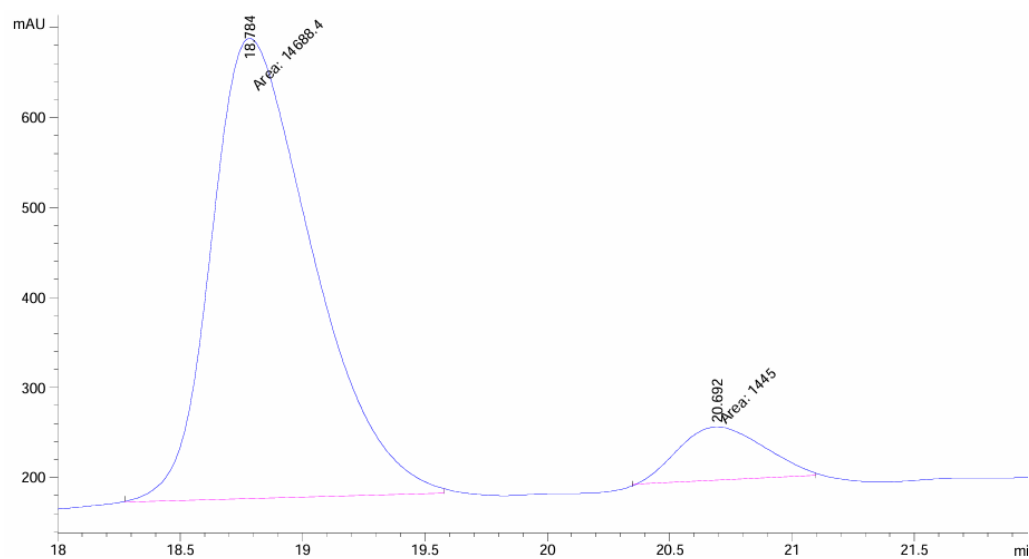

# **Tert-butyl (*R*)-(1-(4-chlorophenyl)-2-nitroethyl)carbamate (4b)**

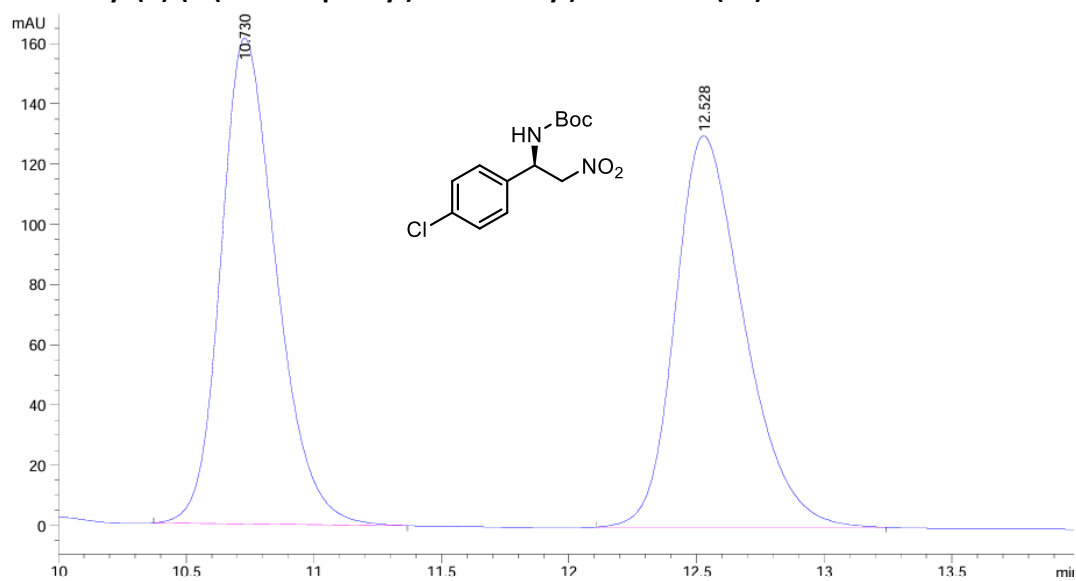

Signal 1: DAD1 A, Sig=254,4 Ref=360,100

| Peak # | RetTime [min] | Type | Width [min] | Area [mAU*s] | Height [mAU] | Area %  |
|--------|---------------|------|-------------|--------------|--------------|---------|
| 1      | 10.730        | BB   | 0.2308      | 2443.55518   | 161.28192    | 49.7940 |
| 2      | 12.528        | BB   | 0.2888      | 2463.77222   | 130.16356    | 50.2060 |

Totals : 4907.32739 291.44548

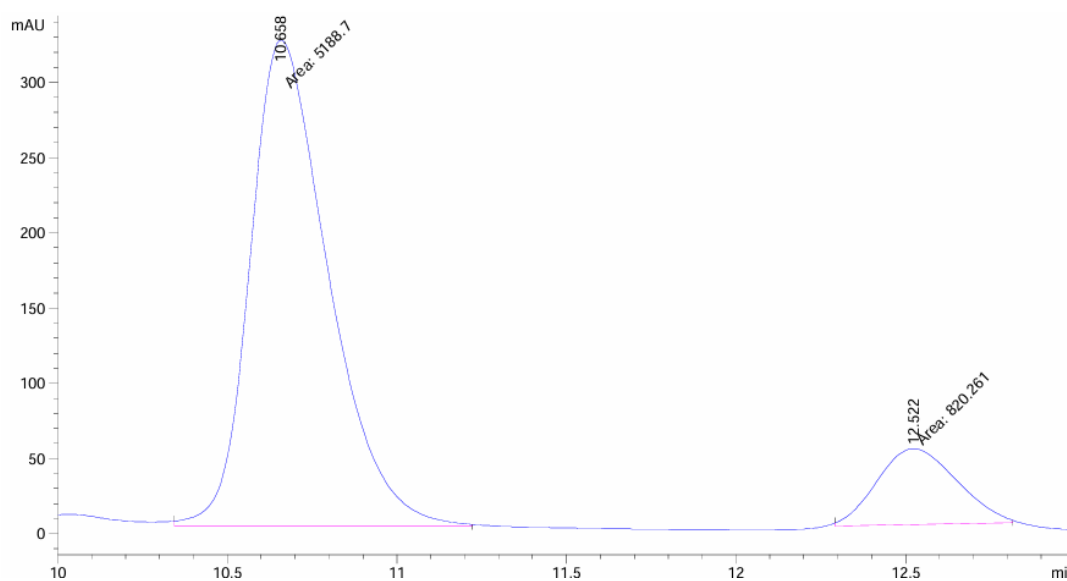

Signal 1: DAD1 A, Sig=254,4 Ref=360,100

| Peak # | RetTime [min] | Type | Width [min] | Area [mAU*s] | Height [mAU] | Area %  |
|--------|---------------|------|-------------|--------------|--------------|---------|
| 1      | 10.658        | MM   | 0.2677      | 5188.70068   | 323.03860    | 86.3494 |
| 2      | 12.522        | MM   | 0.2713      | 820.26141    | 50.38549     | 13.6506 |

Totals : 6008.96210 373.42409

# **Tert-butyl (R)-(1-(3-chlorophenyl)-2-nitroethyl)carbamate (4c)**

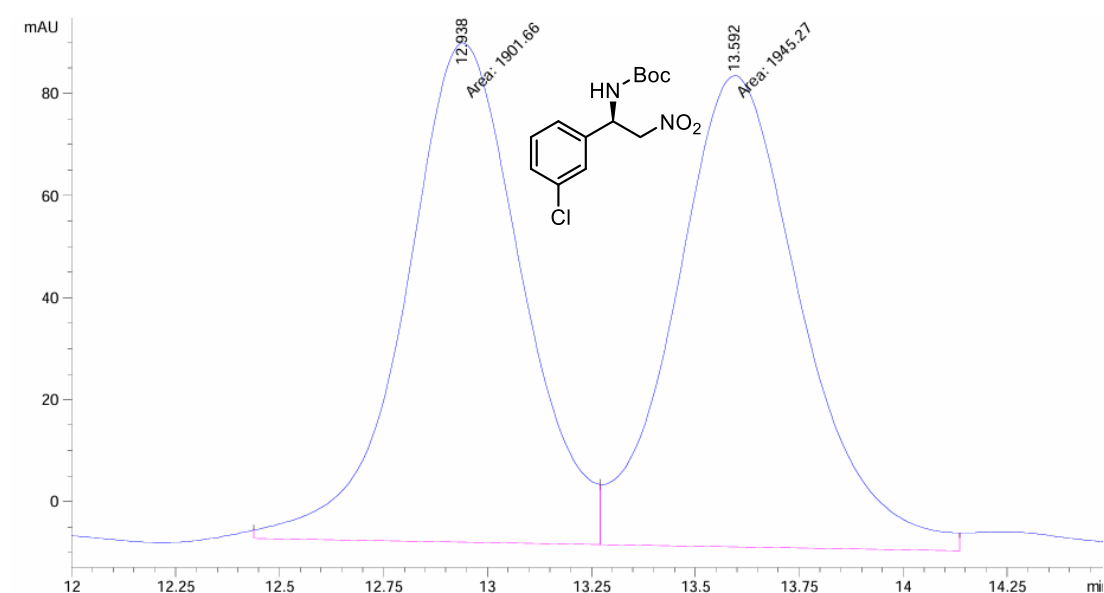

Signal 1: DAD1 D, Sig=230,16 Ref=360,100

| Peak # | RetTime [min] | Type | Width [min] | Area [mAU*s] | Height [mAU] | Area %  |
|--------|---------------|------|-------------|--------------|--------------|---------|
| 1      | 12.938        | MF   | 0.3241      | 1901.65735   | 97.79926     | 49.4332 |
| 2      | 13.592        | FM   | 0.3513      | 1945.26550   | 92.28041     | 50.5668 |

Totals : 3846.92285 190.07967

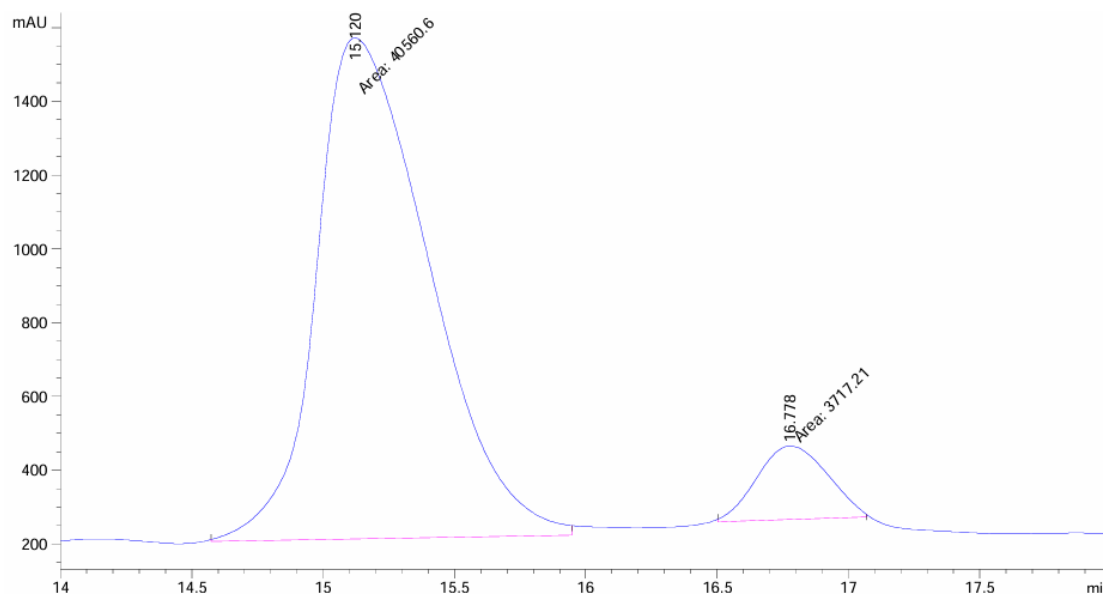

Signal 1: DAD1 D, Sig=230,16 Ref=360,100

| Peak # | RetTime [min] | Type | Width [min] | Area [mAU*s] | Height [mAU] | Area %  |
|--------|---------------|------|-------------|--------------|--------------|---------|
| 1      | 15.120        | MM   | 0.4976      | 4.05606e4    | 1358.56177   | 91.6048 |
| 2      | 16.778        | MM   | 0.3107      | 3717.20703   | 199.42900    | 8.3952  |

Totals : 4.42778e4 1557.99077

# **Tert-butyl (*R*)-(1-(2-chlorophenyl)-2-nitroethyl)carbamate (4d)**

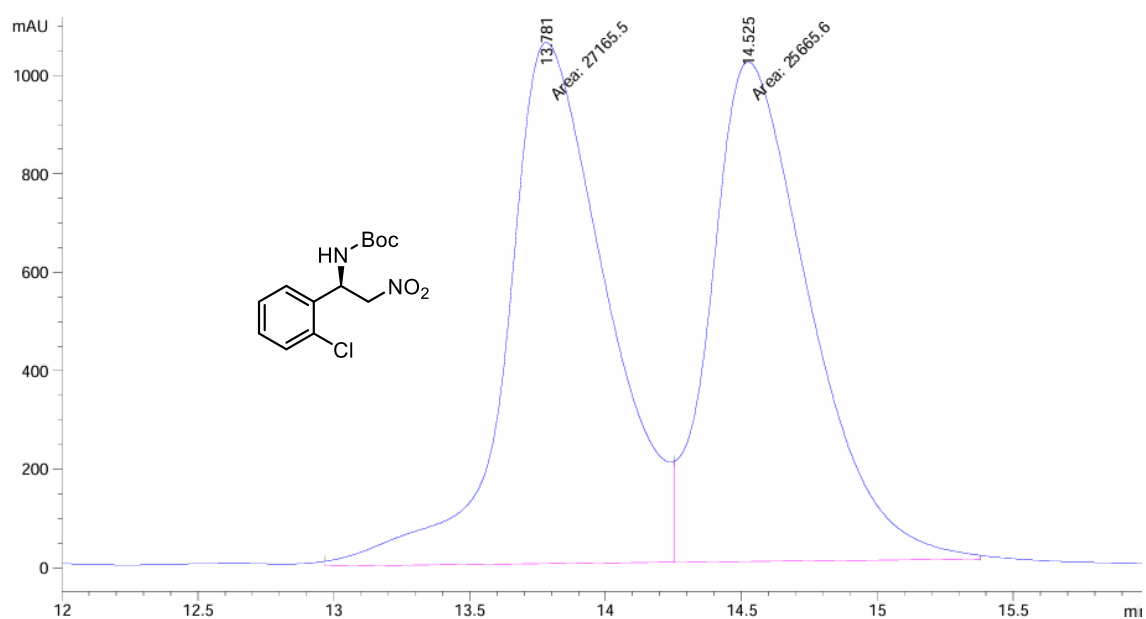

Signal 1: DAD1 D, Sig=230,16 Ref=360,100

| Peak # | RetTime [min] | Type | Width [min] | Area [mAU*s] | Height [mAU] | Area %  |
|--------|---------------|------|-------------|--------------|--------------|---------|
| 1      | 13.781        | MF   | 0.4276      | 2.71655e4    | 1058.89563   | 51.4195 |
| 2      | 14.525        | FM   | 0.4213      | 2.56656e4    | 1015.36279   | 48.5805 |

Totals : 5.28311e4 2074.25842

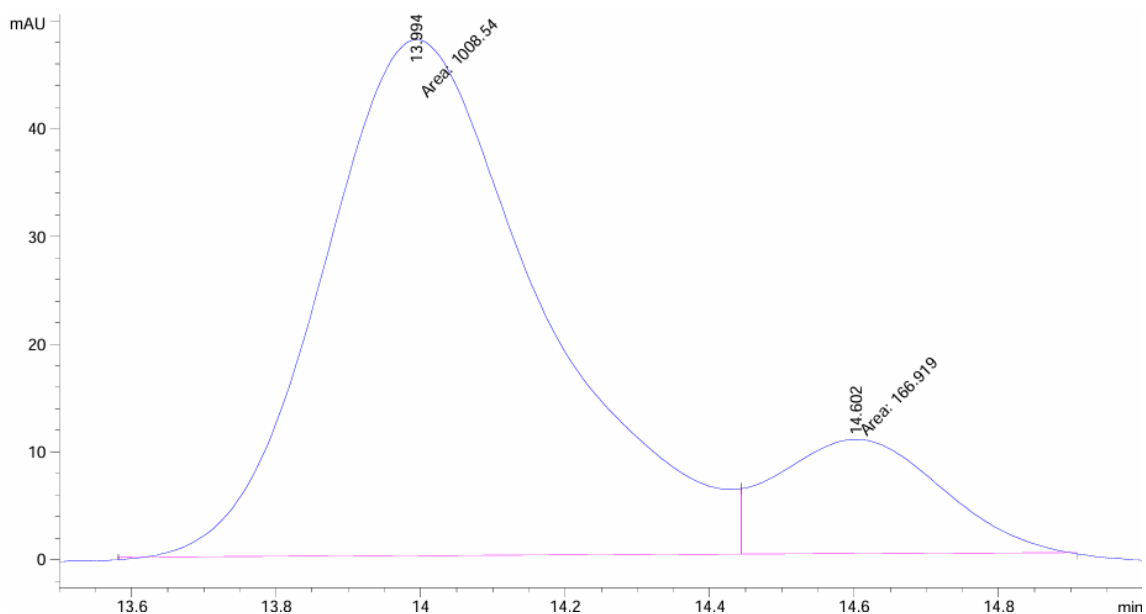

Signal 1: DAD1 B, Sig=254,16 Ref=360,100

| Peak # | RetTime [min] | Type | Width [min] | Area [mAU*s] | Height [mAU] | Area %  |
|--------|---------------|------|-------------|--------------|--------------|---------|
| 1      | 13.994        | MF   | 0.3509      | 1008.54425   | 47.90654     | 85.7997 |
| 2      | 14.602        | FM   | 0.2620      | 166.91896    | 10.61637     | 14.2003 |

Totals : 1175.46321 58.52291



# **Tert-butyl (R)-(1-(naphthalen-1-yl)-2-nitroethyl)carbamate (4e)**

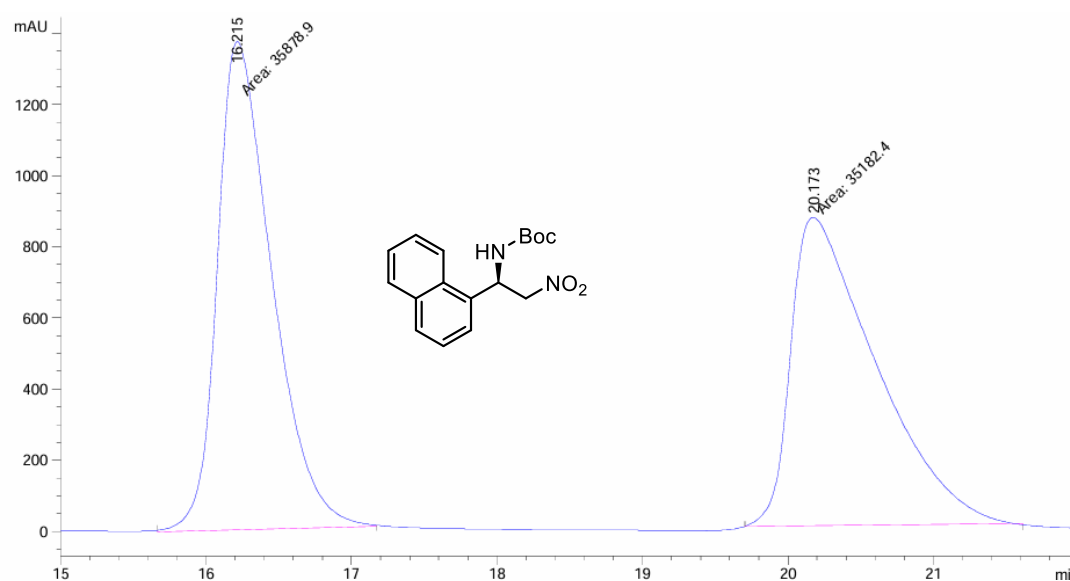

Signal 1: DAD1 B, Sig=254,16 Ref=360,100

| Peak # | RetTime [min] | Type | Width [min] | Area [mAU*s] | Height [mAU] | Area %  |
|--------|---------------|------|-------------|--------------|--------------|---------|
| 1      | 16.215        | MM   | 0.4353      | 3.58789e4    | 1373.73767   | 50.4901 |
| 2      | 20.173        | MM   | 0.6761      | 3.51824e4    | 867.30377    | 49.5099 |

Totals : 7.10613e4 2241.04144

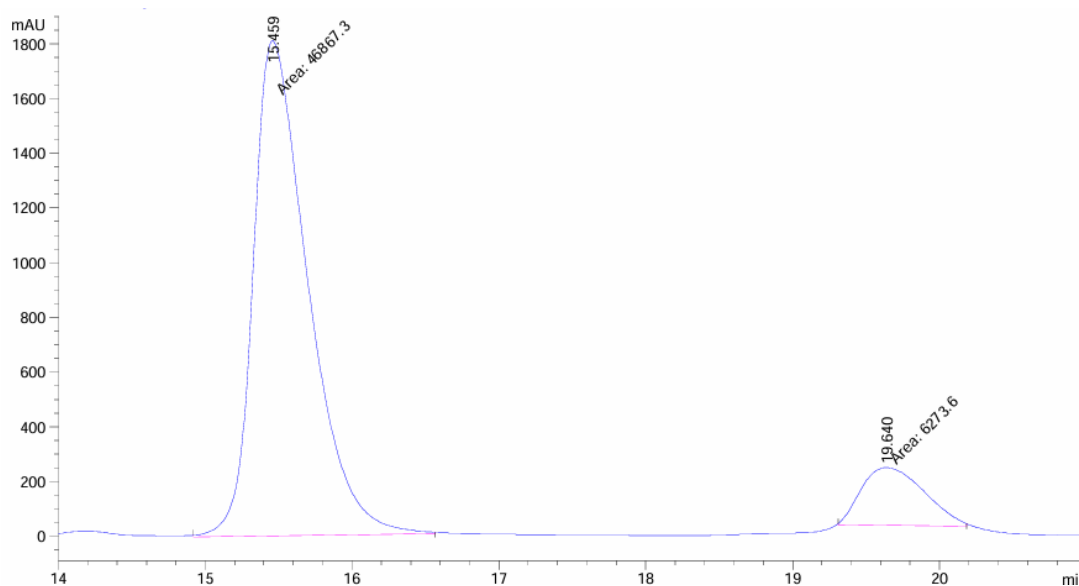

Signal 1: DAD1 B, Sig=254,16 Ref=360,100

| Peak # | RetTime [min] | Type | Width [min] | Area [mAU*s] | Height [mAU] | Area %  |
|--------|---------------|------|-------------|--------------|--------------|---------|
| 1      | 15.459        | MM   | 0.4314      | 4.68673e4    | 1810.73157   | 88.1944 |
| 2      | 19.640        | MM   | 0.4953      | 6273.59863   | 211.09323    | 11.8056 |

Totals : 5.31409e4 2021.82480

# **Tert-butyl (*R*)-(1-(naphthalen-2-yl)-2-nitroethyl)carbamate (4f)**

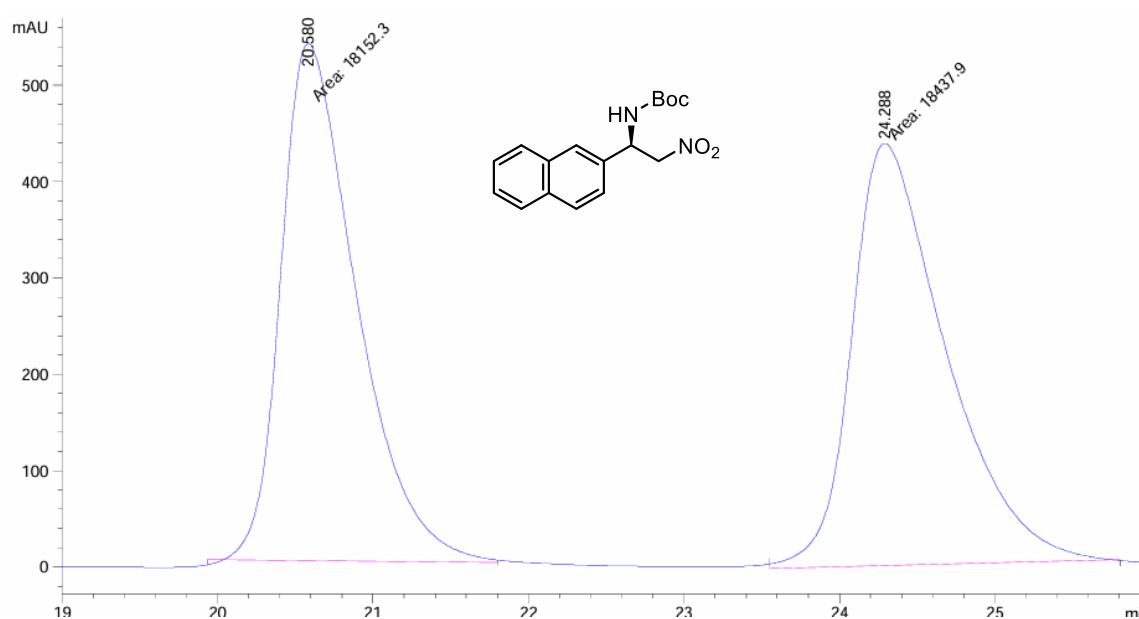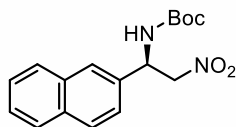

Signal 1: DAD1 B, Sig=254,16 Ref=360,100

| Peak # | RetTime [min] | Type | Width [min] | Area [mAU*s] | Height [mAU] | Area %  |
|--------|---------------|------|-------------|--------------|--------------|---------|
| 1      | 20.580        | MM   | 0.5635      | 1.81523e4    | 536.86047    | 49.6097 |
| 2      | 24.288        | MM   | 0.7011      | 1.84379e4    | 438.31787    | 50.3903 |

Totals : 3.65903e4 975.17834

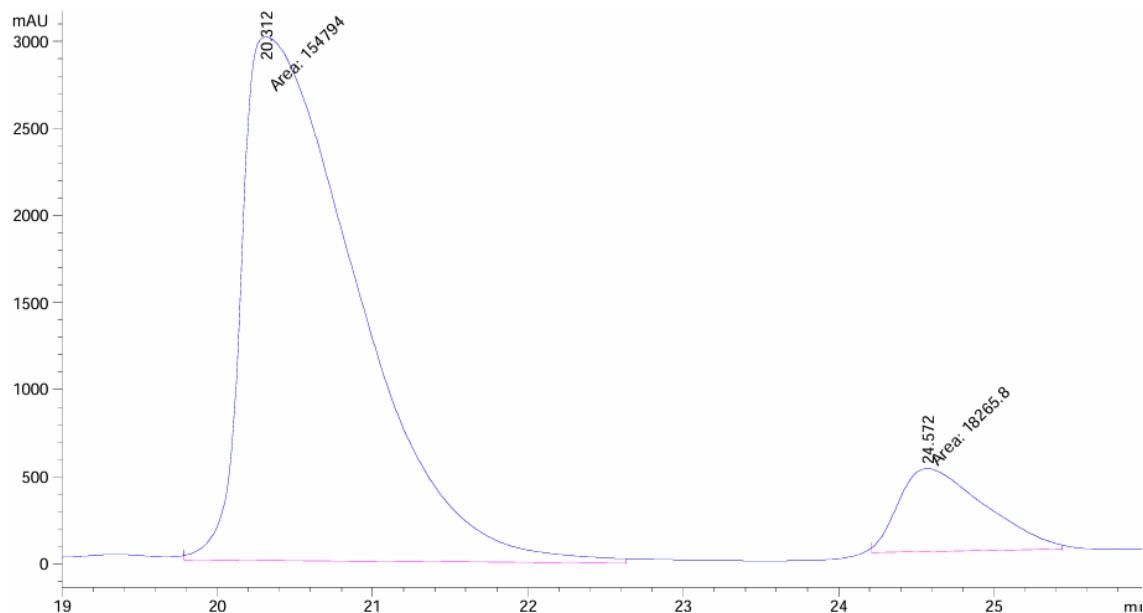

Signal 1: DAD1 B, Sig=254,16 Ref=360,100

| Peak # | RetTime [min] | Type | Width [min] | Area [mAU*s] | Height [mAU] | Area %  |
|--------|---------------|------|-------------|--------------|--------------|---------|
| 1      | 20.312        | MM   | 0.8579      | 1.54794e5    | 3007.25537   | 89.4454 |
| 2      | 24.572        | MM   | 0.6396      | 1.82658e4    | 475.93234    | 10.5546 |

Totals : 1.73060e5 3483.18771

# **Tert-butyl (R)-(2-nitro-1-(pyridin-3-yl)ethyl)carbamate (4g)**

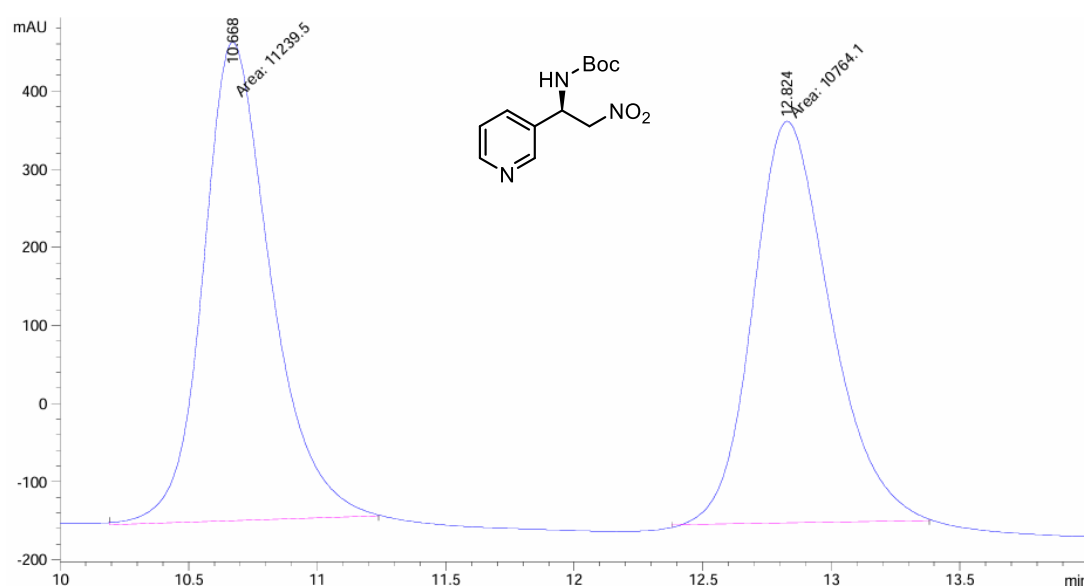

Signal 1: DAD1 C, Sig=210,8 Ref=360,100

| Peak # | RetTime [min] | Type | Width [min] | Area [mAU*s] | Height [mAU] | Area %  |
|--------|---------------|------|-------------|--------------|--------------|---------|
| 1      | 10.668        | MM   | 0.3058      | 1.12395e4    | 612.61719    | 51.0805 |
| 2      | 12.824        | MM   | 0.3492      | 1.07641e4    | 513.78003    | 48.9195 |

Totals : 2.20036e4 1126.39722

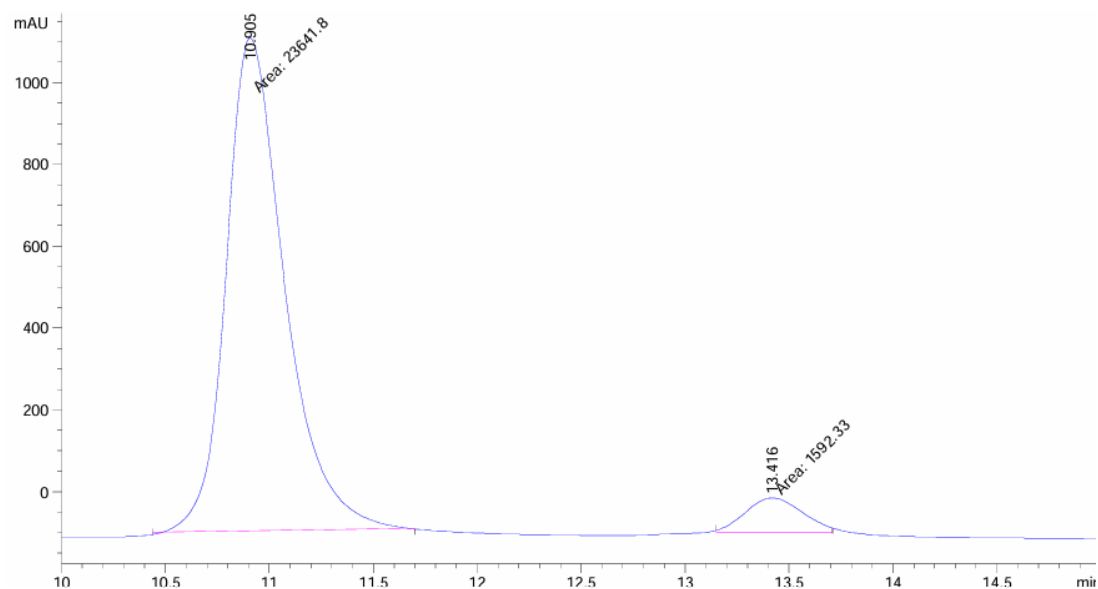

Signal 1: DAD1 C, Sig=210,8 Ref=360,100

| Peak # | RetTime [min] | Type | Width [min] | Area [mAU*s] | Height [mAU] | Area %  |
|--------|---------------|------|-------------|--------------|--------------|---------|
| 1      | 10.905        | MM   | 0.3271      | 2.36418e4    | 1204.67261   | 93.6898 |
| 2      | 13.416        | MM   | 0.3169      | 1592.33142   | 83.73948     | 6.3102  |

Totals : 2.52342e4 1288.41209

# **Tert-butyl (R)-(2-nitro-1-(thiophen-2-yl)ethyl)carbamate (4h)**

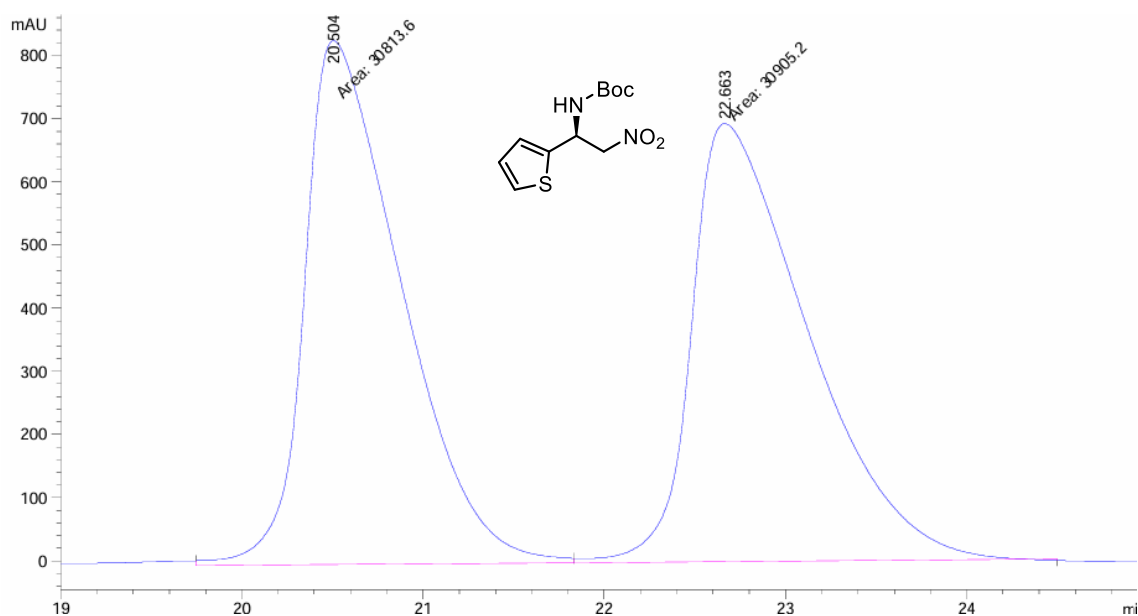

Signal 1: DAD1 B, Sig=254,16 Ref=360,100

| Peak # | RetTime [min] | Type | Width [min] | Area [mAU*s] | Height [mAU] | Area %  |
|--------|---------------|------|-------------|--------------|--------------|---------|
| 1      | 20.504        | MF   | 0.6191      | 3.08136e4    | 829.49475    | 49.9258 |
| 2      | 22.663        | FM   | 0.7427      | 3.09052e4    | 693.54529    | 50.0742 |

Totals : 6.17188e4 1523.04004

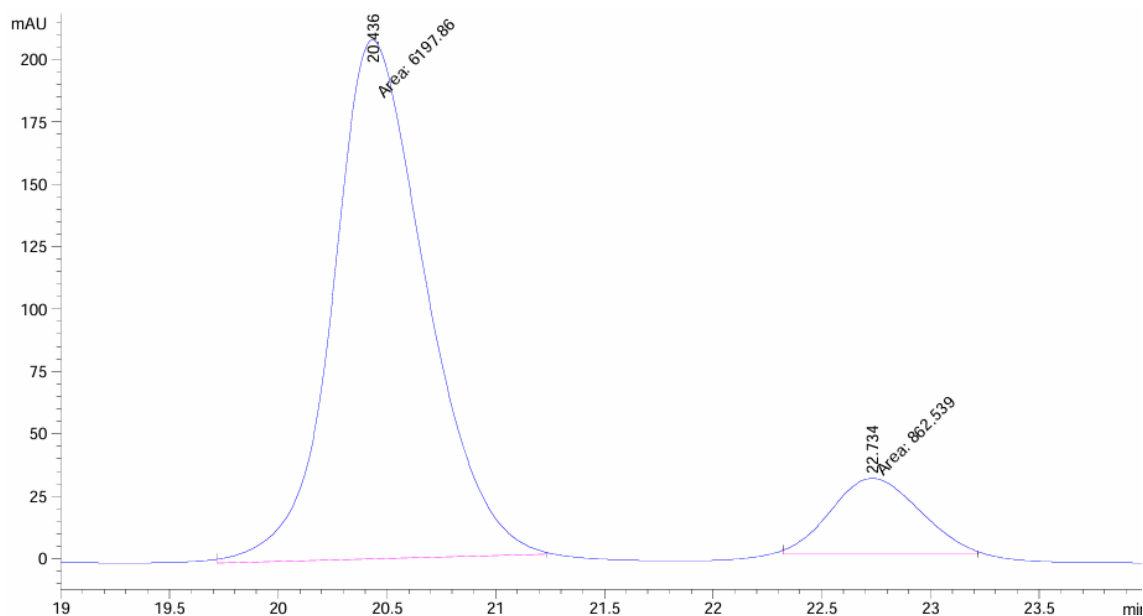

Signal 1: DAD1 B, Sig=254,16 Ref=360,100

| Peak # | RetTime [min] | Type | Width [min] | Area [mAU*s] | Height [mAU] | Area %  |
|--------|---------------|------|-------------|--------------|--------------|---------|
| 1      | 20.436        | MM   | 0.4966      | 6197.85547   | 208.00462    | 87.7834 |
| 2      | 22.734        | MM   | 0.4725      | 862.53937    | 30.42364     | 12.2166 |

Totals : 7060.39484 238.42826

**Tert-butyl (R)-(1-(2-bromophenyl)-2-nitroethyl)carbamate (4i)**

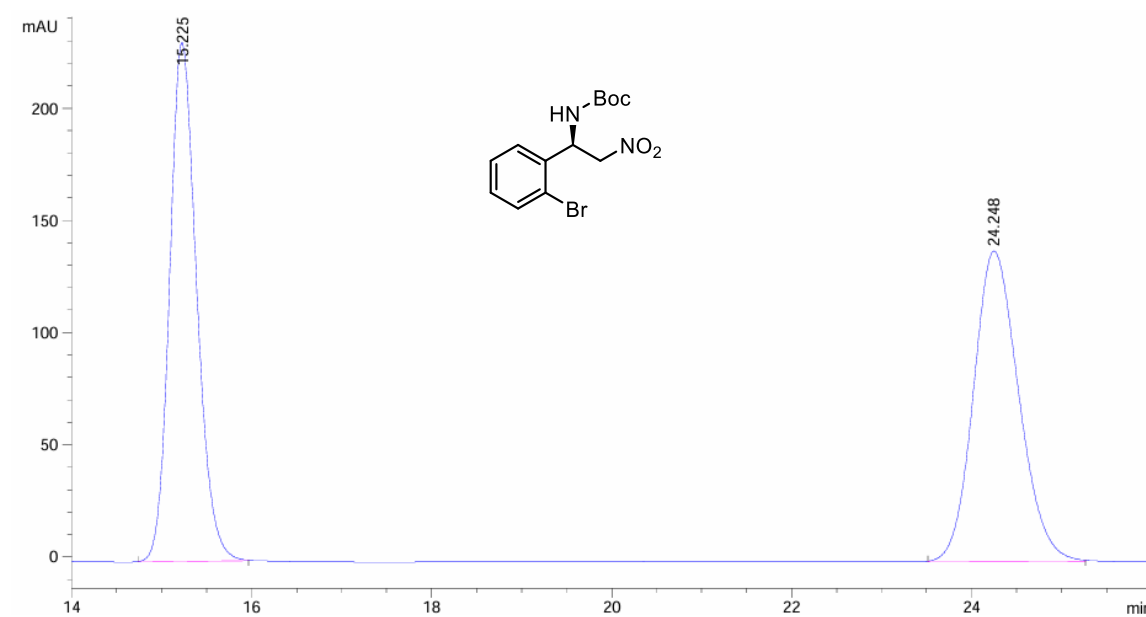

Signal 1: DAD1 B, Sig=254,16 Ref=360,100

| Peak # | RetTime [min] | Type | Width [min] | Area [mAU*s] | Height [mAU] | Area %  |
|--------|---------------|------|-------------|--------------|--------------|---------|
| 1      | 15.225        | BB   | 0.3193      | 4821.98438   | 231.21657    | 49.9596 |
| 2      | 24.248        | BB   | 0.5393      | 4829.78369   | 138.33565    | 50.0404 |

Totals : 9651.76807 369.55222

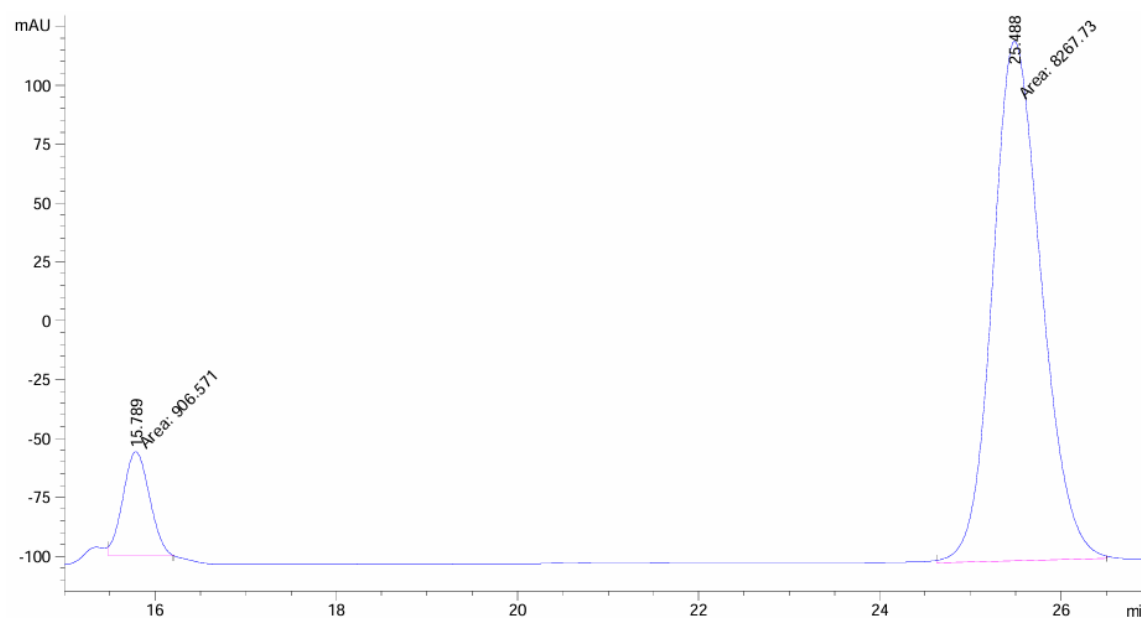

Signal 1: DAD1 B, Sig=254,16 Ref=360,100

| Peak # | RetTime [min] | Type | Width [min] | Area [mAU*s] | Height [mAU] | Area %  |
|--------|---------------|------|-------------|--------------|--------------|---------|
| 1      | 15.789        | MM   | 0.3414      | 906.57147    | 44.26062     | 9.8816  |
| 2      | 25.488        | MM   | 0.6248      | 8267.72656   | 220.55910    | 90.1184 |

Totals : 9174.29803 264.81972

# **Tert-butyl (R)-(1-(2-bromophenyl)-2-nitroethyl)carbamate (4j)**

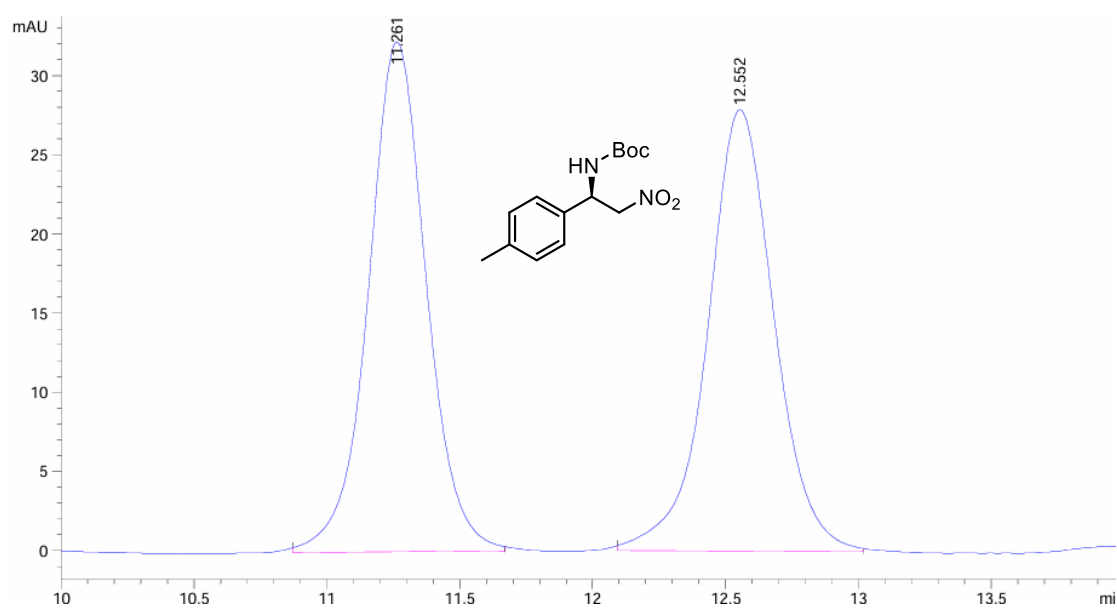

Signal 1: DAD1 B, Sig=254,16 Ref=550,100

| Peak # | RetTime [min] | Type | Width [min] | Area [mAU*s] | Height [mAU] | Area %  |
|--------|---------------|------|-------------|--------------|--------------|---------|
| 1      | 11.261        | BB   | 0.2309      | 488.31039    | 32.21157     | 50.1146 |
| 2      | 12.552        | BB   | 0.2633      | 486.07770    | 27.89753     | 49.8854 |

Totals : 974.38809 60.10910

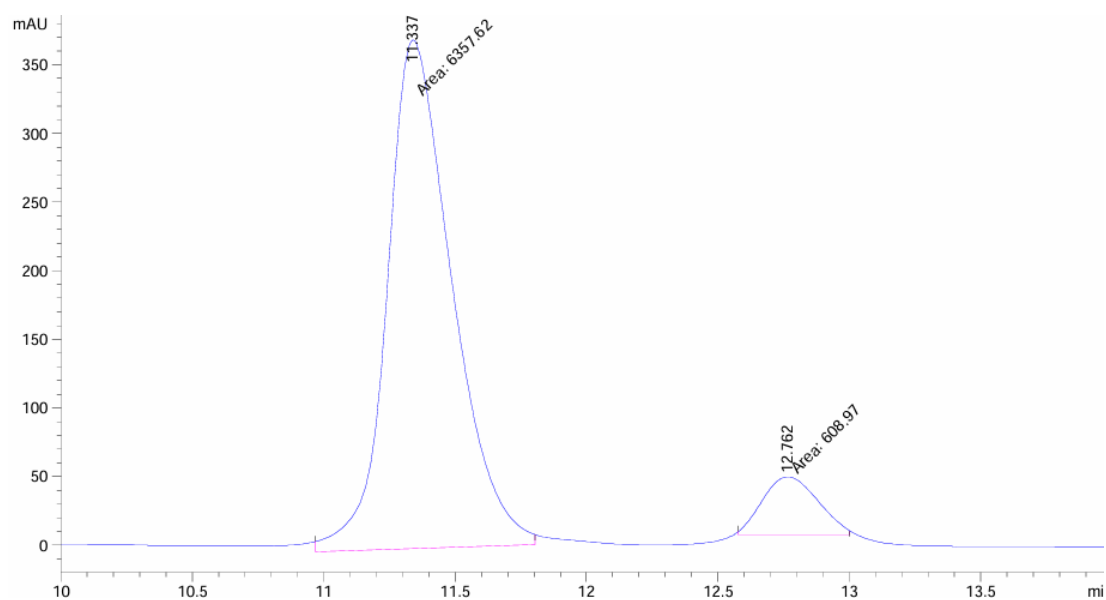

Signal 1: DAD1 A, Sig=254,4 Ref=550,99.7

| Peak # | RetTime [min] | Type | Width [min] | Area [mAU*s] | Height [mAU] | Area %  |
|--------|---------------|------|-------------|--------------|--------------|---------|
| 1      | 11.337        | MM   | 0.2860      | 6357.62061   | 370.54602    | 91.2587 |
| 2      | 12.762        | MM   | 0.2421      | 608.96997    | 41.92290     | 8.7413  |

Totals : 6966.59058 412.46892

# **Tert-butyl (*R*)-(2-nitro-1-(4-(trifluoromethyl)phenyl)ethyl)carbamate (4k)**

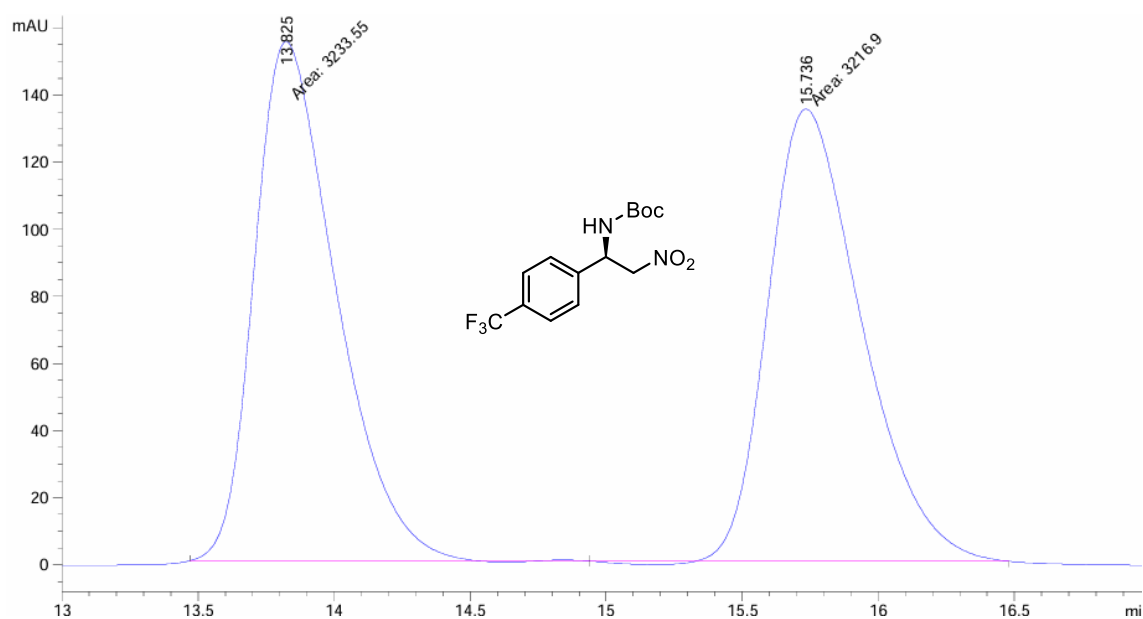

Signal 1: DAD1 B, Sig=254,16 Ref=550,100

| Peak # | RetTime [min] | Type | Width [min] | Area [mAU*s] | Height [mAU] | Area %  |
|--------|---------------|------|-------------|--------------|--------------|---------|
| 1      | 13.825        | MF   | 0.3483      | 3233.54590   | 154.74586    | 50.1290 |
| 2      | 15.736        | FM   | 0.3982      | 3216.89966   | 134.63853    | 49.8710 |

Totals : 6450.44556 289.38440

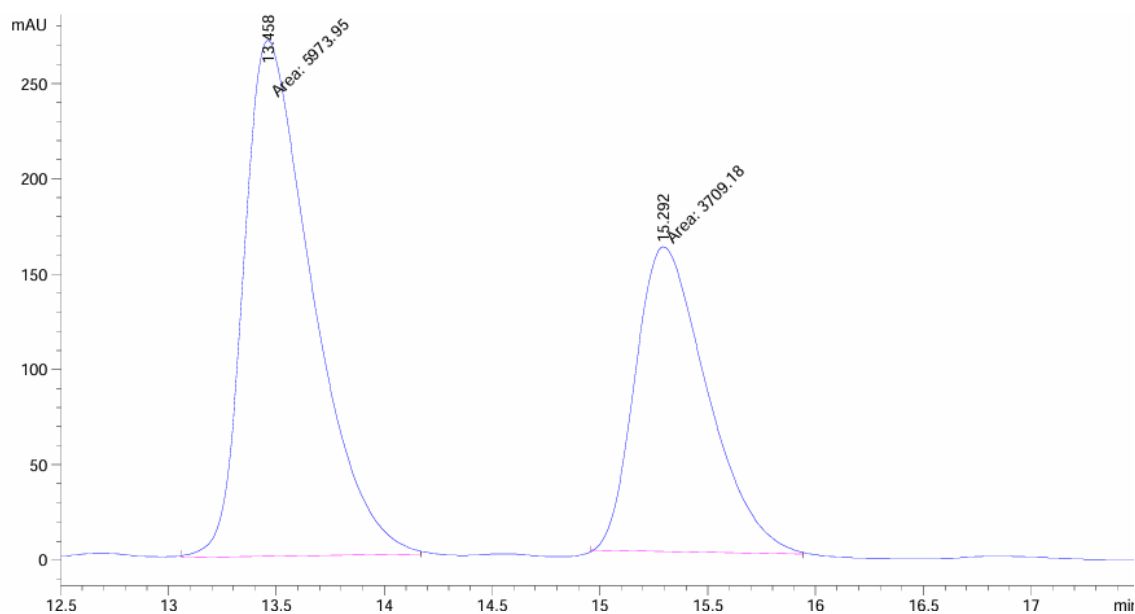

Signal 1: DAD1 B, Sig=254,16 Ref=550,100

| Peak # | RetTime [min] | Type | Width [min] | Area [mAU*s] | Height [mAU] | Area %  |
|--------|---------------|------|-------------|--------------|--------------|---------|
| 1      | 13.458        | MM   | 0.3682      | 5973.95068   | 270.43240    | 61.6944 |
| 2      | 15.292        | MM   | 0.3871      | 3709.17822   | 159.69753    | 38.3056 |

Totals : 9683.12891 430.12993

# **Tert-butyl (R)-(1-(furan-2-yl)-2-nitroethyl)carbamate (4I)**

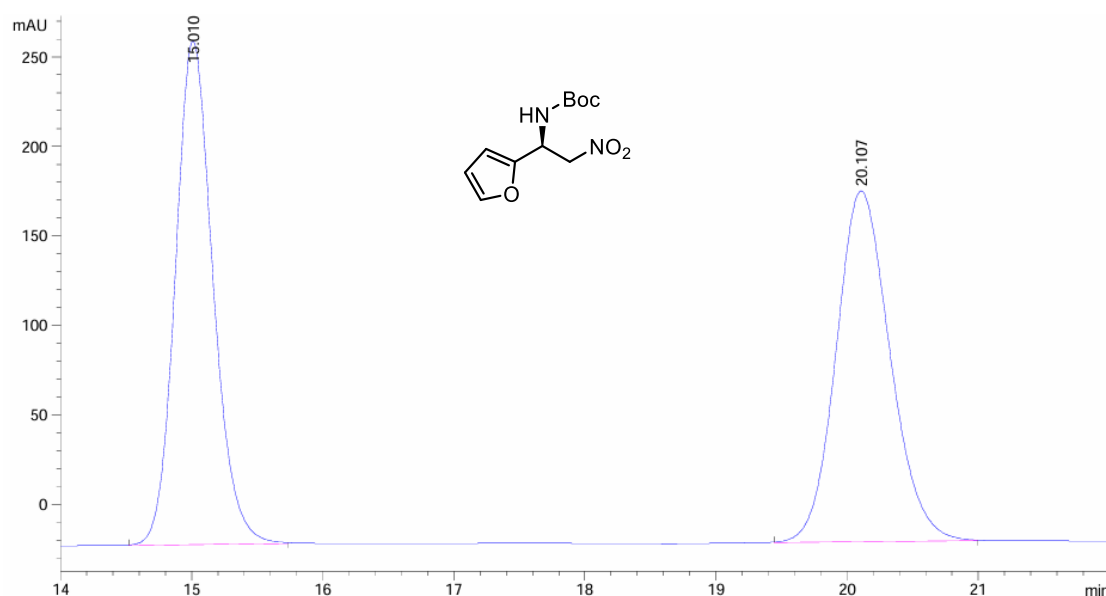

Signal 1: DAD1 B, Sig=254,16 Ref=360,100

| Peak # | RetTime [min] | Type | Width [min] | Area [mAU*s] | Height [mAU] | Area %  |
|--------|---------------|------|-------------|--------------|--------------|---------|
| 1      | 15.010        | BB   | 0.3047      | 5614.80566   | 281.54291    | 50.0372 |
| 2      | 20.107        | BB   | 0.4415      | 5606.45557   | 196.10039    | 49.9628 |

Totals : 1.12213e4 477.64330

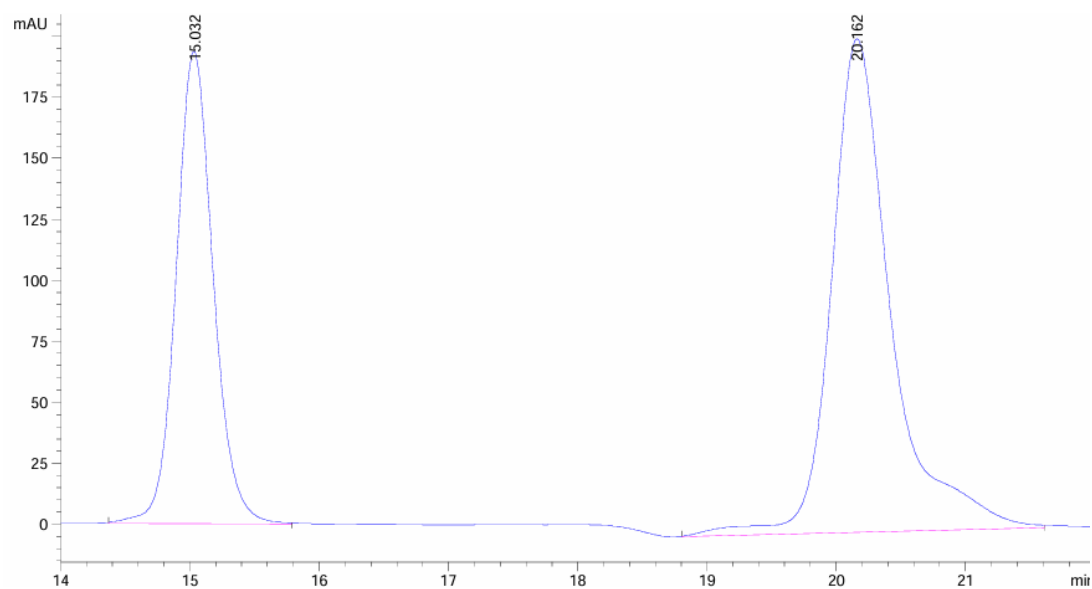

Signal 1: DAD1 B, Sig=254,16 Ref=360,100

| Peak # | RetTime [min] | Type | Width [min] | Area [mAU*s] | Height [mAU] | Area %  |
|--------|---------------|------|-------------|--------------|--------------|---------|
| 1      | 15.032        | BB   | 0.3055      | 3875.34839   | 193.62755    | 37.3029 |
| 2      | 20.162        | BB   | 0.4778      | 6513.52832   | 202.19289    | 62.6971 |

Totals : 1.03889e4 395.82043



## Chiral HPLC chromatograms of 6

### (S)-dimethyl 2-(2-nitro-1-phenylethyl)malonate (6a)

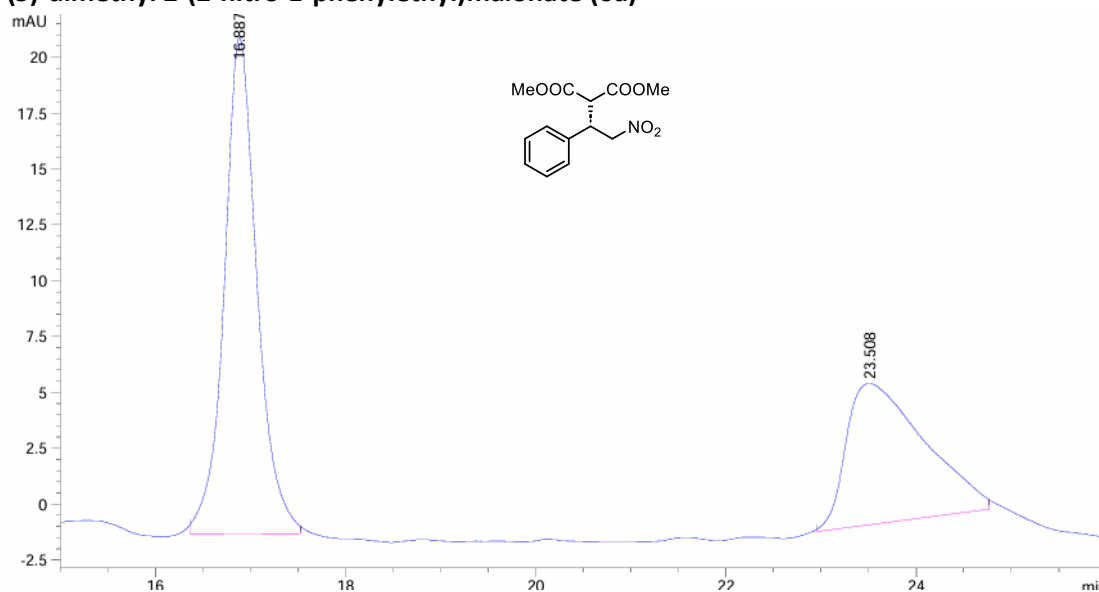

Signal 1: DAD1 A, Sig=254,4 Ref=360,100

| Peak # | RetTime [min] | Type | Width [min] | Area [mAU*s] | Height [mAU] | Area %  |
|--------|---------------|------|-------------|--------------|--------------|---------|
| 1      | 16.887        | BB   | 0.3607      | 535.05011    | 22.23783     | 49.5488 |
| 2      | 23.503        | MM   | 1.2590      | 544.79376    | 7.21205      | 50.4512 |

Totals : 1079.84387 29.44987

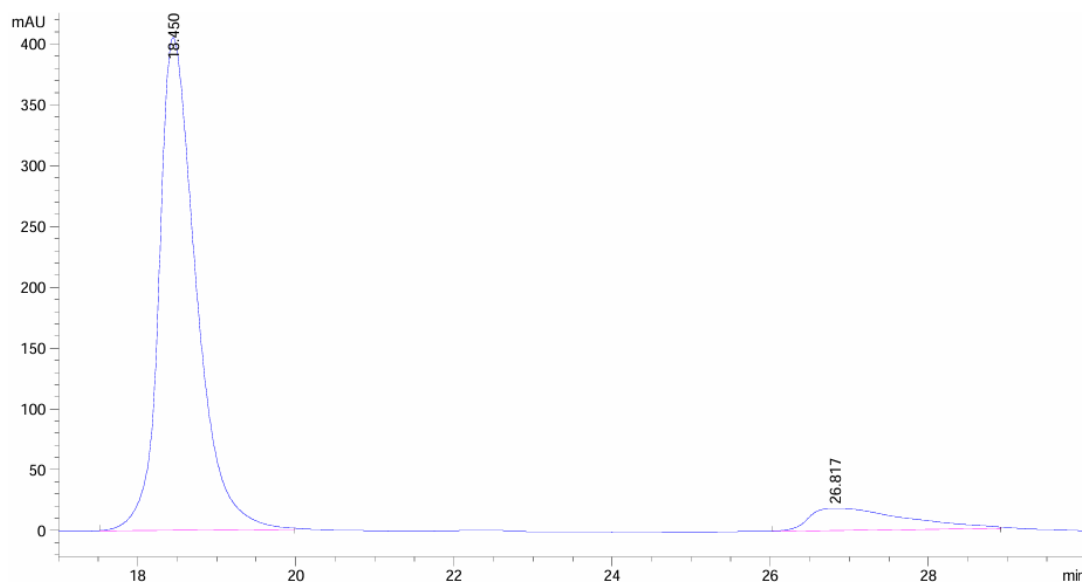

Signal 1: DAD1 B, Sig=254,16 Ref=360,100

| Peak # | RetTime [min] | Type | Width [min] | Area [mAU*s] | Height [mAU] | Area %  |
|--------|---------------|------|-------------|--------------|--------------|---------|
| 1      | 18.450        | BB   | 0.4942      | 1.32816e4    | 405.38852    | 89.6975 |
| 2      | 26.817        | BB   | 1.2262      | 1525.50781   | 18.23069     | 10.3025 |

Totals : 1.48071e4 423.61921

**(S)-dimethyl 2-(1-(4-fluorophenyl)-2-nitroethyl)malonate (6b)**

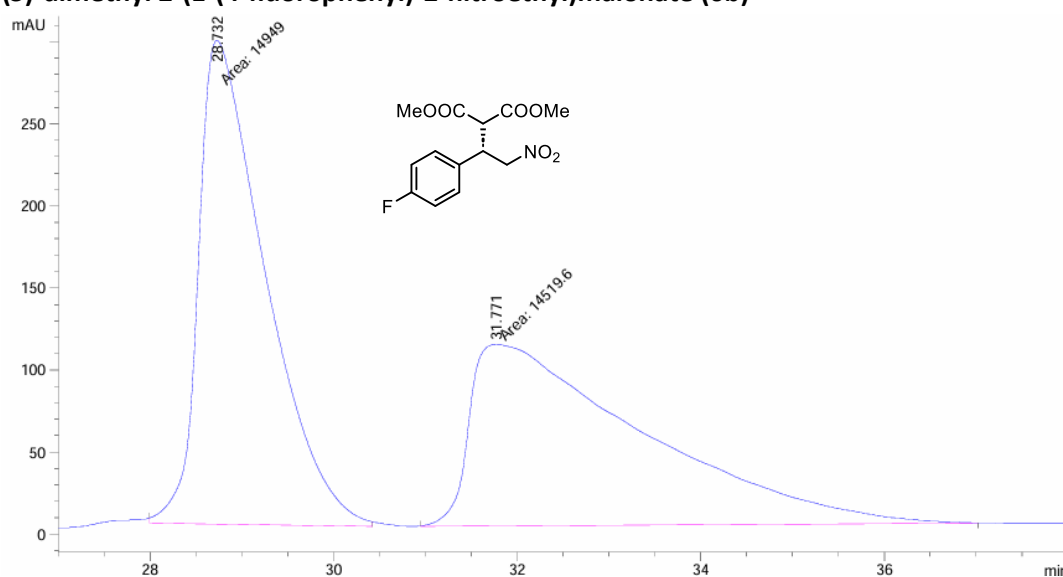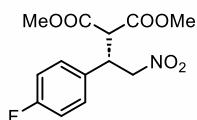

Signal 1: DAD1 A, Sig=254,4 Ref=360,100

| Peak # | RetTime [min] | Type | Width [min] | Area [mAU*s] | Height [mAU] | Area %  |
|--------|---------------|------|-------------|--------------|--------------|---------|
| 1      | 28.732        | MM   | 0.8452      | 1.49490e4    | 294.78055    | 50.7286 |
| 2      | 31.771        | MM   | 2.1865      | 1.45196e4    | 110.67889    | 49.2714 |

Totals : 2.94687e4 405.45944

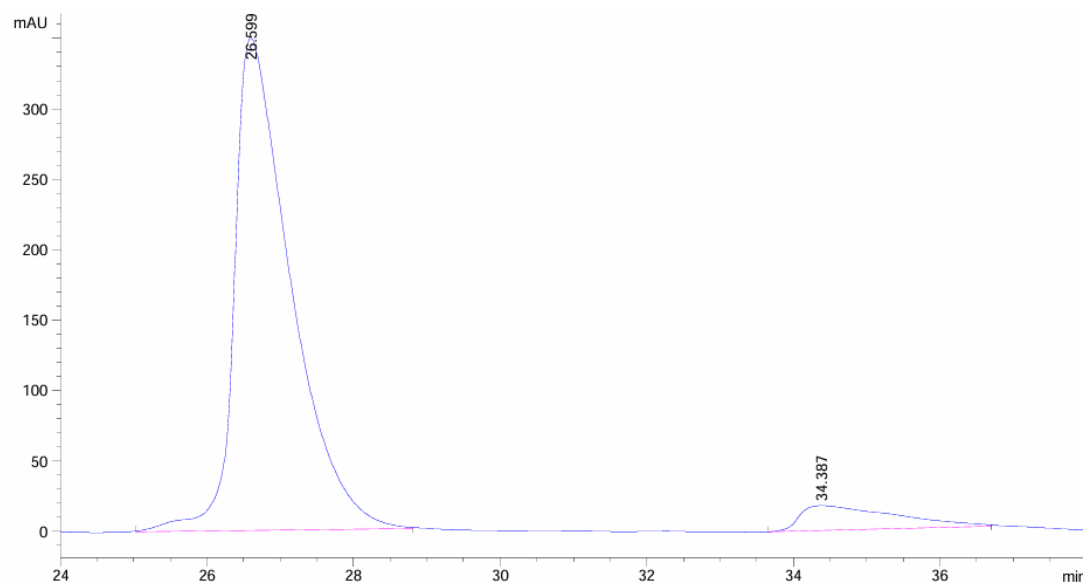

Signal 1: DAD1 B, Sig=254,16 Ref=360,100

| Peak # | RetTime [min] | Type | Width [min] | Area [mAU*s] | Height [mAU] | Area %  |
|--------|---------------|------|-------------|--------------|--------------|---------|
| 1      | 26.599        | BB   | 0.8085      | 1.87842e4    | 349.78241    | 92.2168 |
| 2      | 34.387        | BB   | 1.2584      | 1585.40247   | 17.60824     | 7.7832  |

Totals : 2.03696e4 367.39065

**(S)-dimethyl 2-(1-(4-chlorophenyl)-2-nitroethyl)malonate (6c)**

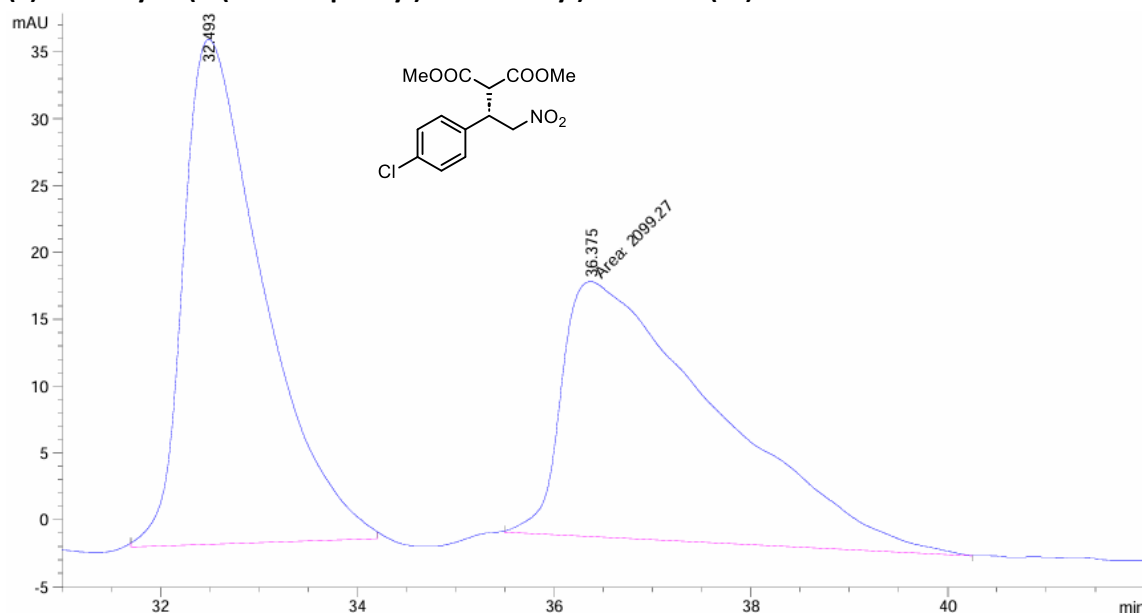

Signal 1: DAD1 A, Sig=254,4 Ref=360,100

| Peak # | RetTime [min] | Type | Width [min] | Area [mAU*s] | Height [mAU] | Area %  |
|--------|---------------|------|-------------|--------------|--------------|---------|
| 1      | 32.493        | BB   | 0.8260      | 2130.01782   | 37.76342     | 50.3636 |
| 2      | 36.375        | MM   | 1.8358      | 2099.26660   | 19.05853     | 49.6364 |

Totals : 4229.28442 56.82195

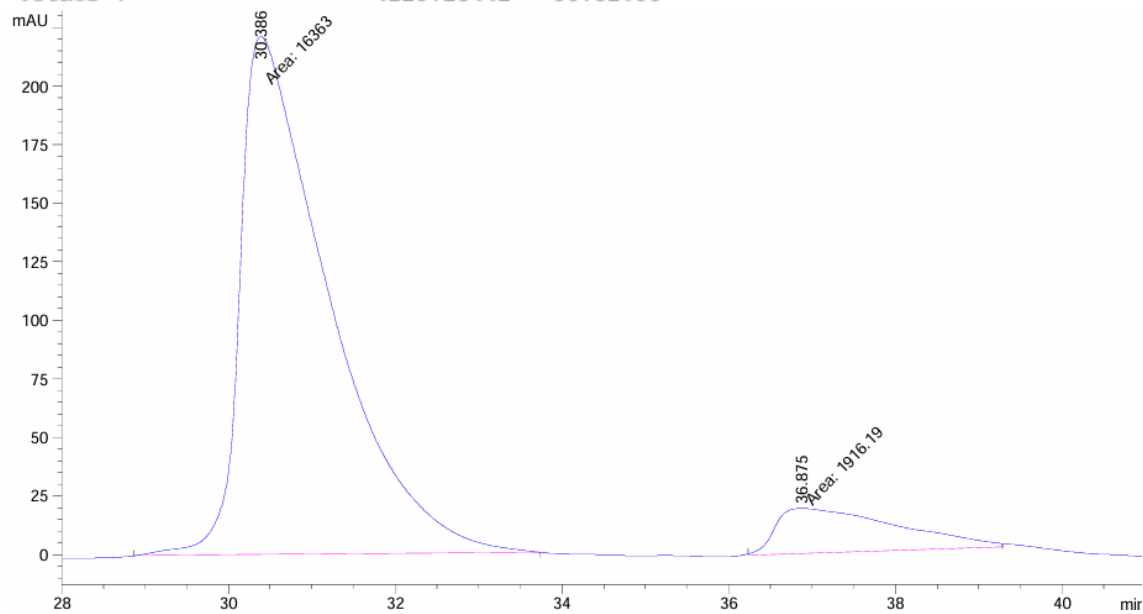

Signal 1: DAD1 B, Sig=254,16 Ref=360,100

| Peak # | RetTime [min] | Type | Width [min] | Area [mAU*s] | Height [mAU] | Area %  |
|--------|---------------|------|-------------|--------------|--------------|---------|
| 1      | 30.386        | MM   | 1.2335      | 1.63630e4    | 221.08369    | 89.5171 |
| 2      | 36.875        | MM   | 1.6546      | 1916.18994   | 19.30120     | 10.4829 |

Totals : 1.82792e4 240.38489

**(S)-dimethyl 2-(1-(4-bromophenyl)-2-nitroethyl)malonate (6d)**

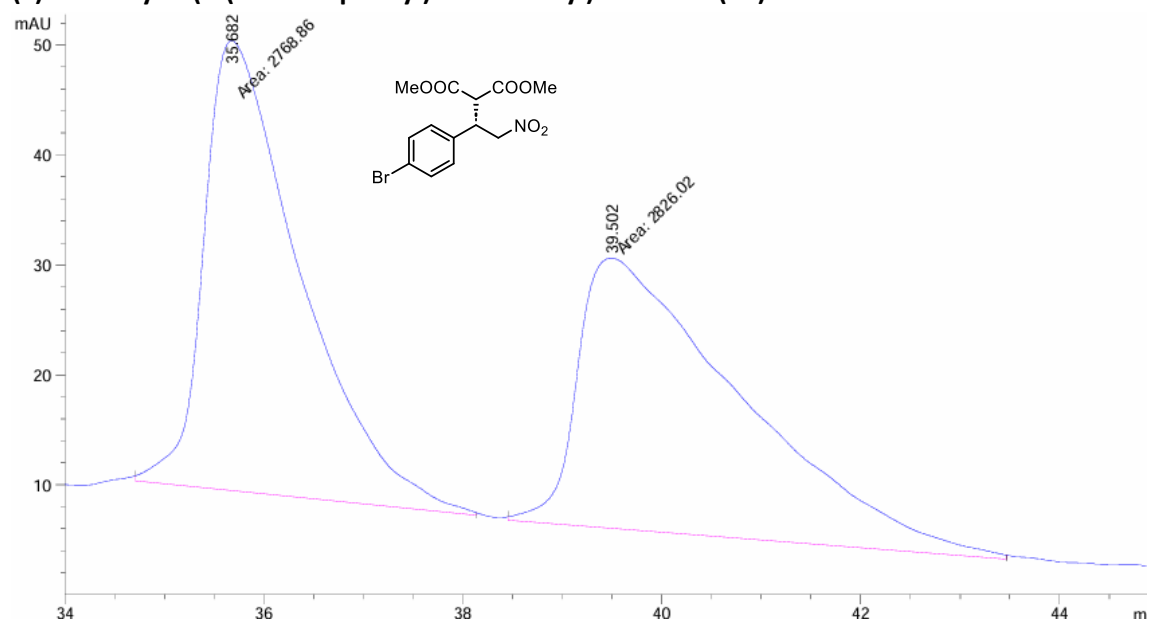

Signal 1: DAD1 A, Sig=254,4 Ref=360,100

| Peak # | RetTime [min] | Type | Width [min] | Area [mAU*s] | Height [mAU] | Area %  |
|--------|---------------|------|-------------|--------------|--------------|---------|
| 1      | 35.682        | MM   | 1.1275      | 2768.85547   | 40.93092     | 49.4891 |
| 2      | 39.502        | MM   | 1.9163      | 2826.02197   | 24.57929     | 50.5109 |

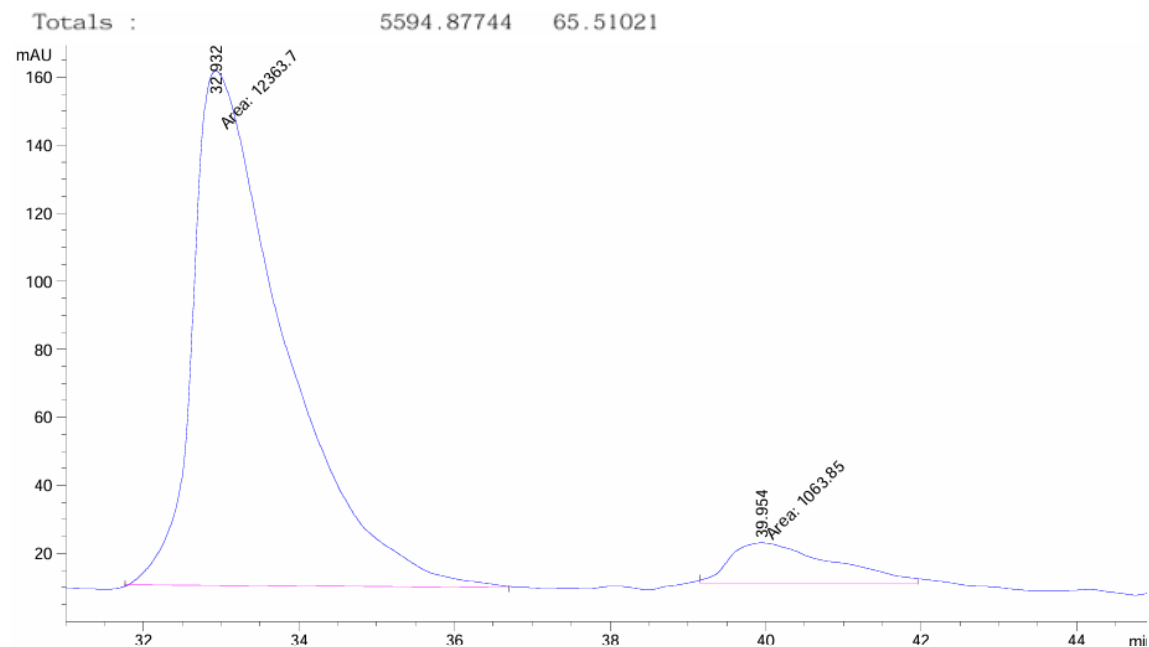

Signal 1: DAD1 B, Sig=254,16 Ref=360,100

| Peak # | RetTime [min] | Type | Width [min] | Area [mAU*s] | Height [mAU] | Area %  |
|--------|---------------|------|-------------|--------------|--------------|---------|
| 1      | 32.932        | MM   | 1.3638      | 1.23637e4    | 151.09863    | 92.0771 |
| 2      | 39.954        | MM   | 1.5060      | 1063.84729   | 11.77319     | 7.9229  |

Totals : 1.34276e4 162.87182

**(S)-dimethyl 2-(1-(4-cyanophenyl)-2-nitroethyl)malonate (6e)**

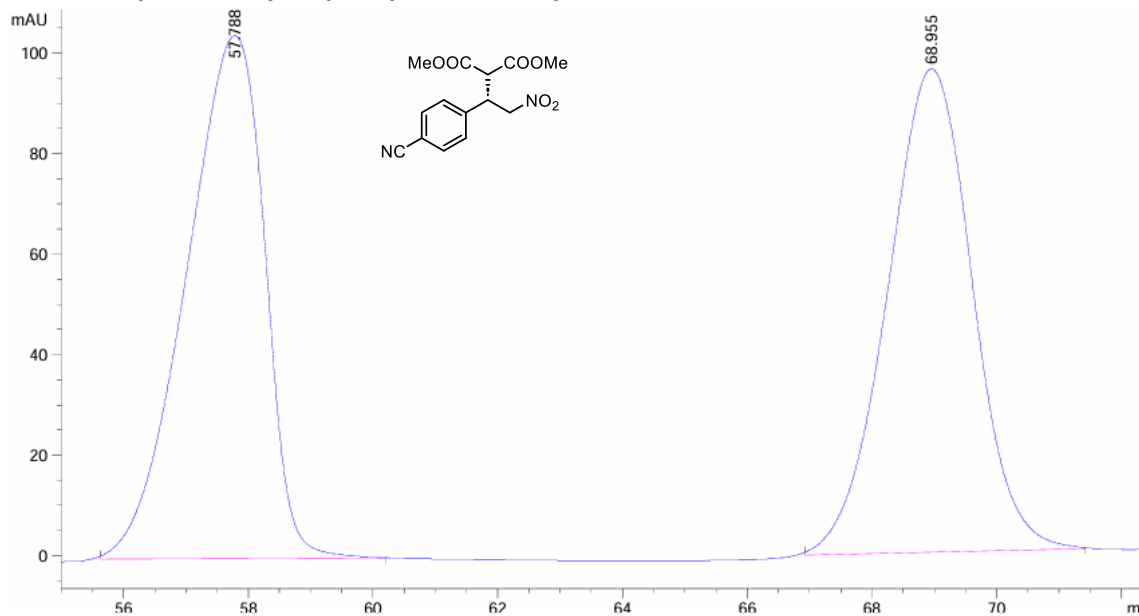

Signal 1: DAD1 A, Sig=254,4 Ref=360,100

| Peak # | RetTime [min] | Type | Width [min] | Area [mAU*s] | Height [mAU] | Area %  |
|--------|---------------|------|-------------|--------------|--------------|---------|
| 1      | 57.788        | BB   | 1.3769      | 9072.02930   | 104.07824    | 49.9349 |
| 2      | 68.955        | BB   | 1.4512      | 9095.68652   | 96.18860     | 50.0651 |

Totals : 1.81677e4 200.26684

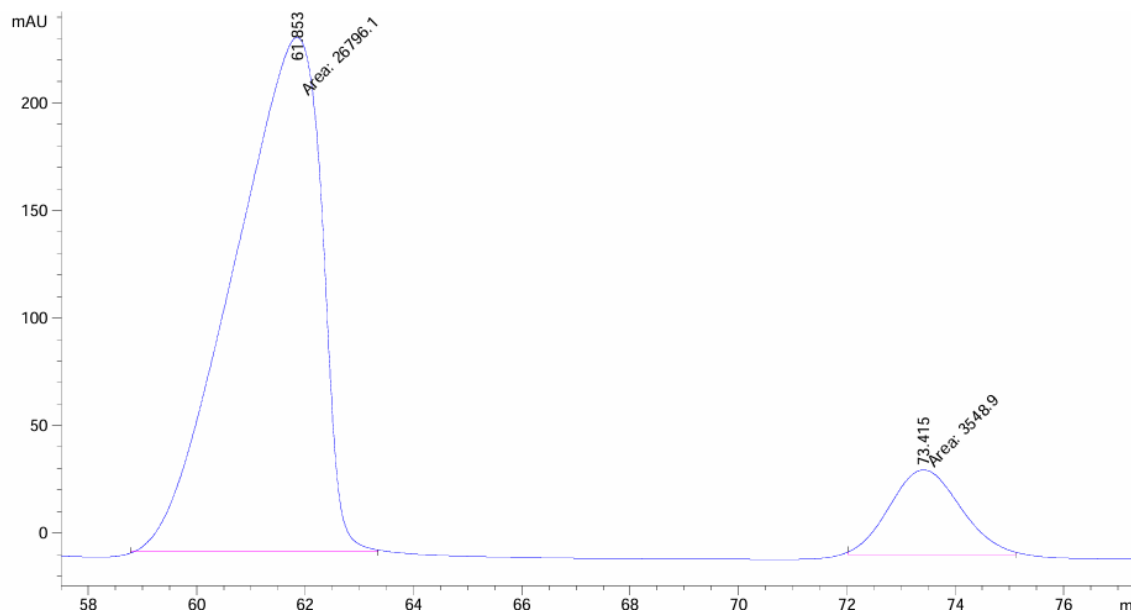

Signal 1: DAD1 B, Sig=254,16 Ref=360,100

| Peak # | RetTime [min] | Type | Width [min] | Area [mAU*s] | Height [mAU] | Area %  |
|--------|---------------|------|-------------|--------------|--------------|---------|
| 1      | 61.853        | MM   | 1.8680      | 2.67961e4    | 239.08089    | 88.3048 |
| 2      | 73.415        | MM   | 1.5085      | 3548.89819   | 39.20918     | 11.6952 |

Totals : 3.03450e4 278.29007

**(S)-dimethyl 2-(2-nitro-1-(p-tolyl)ethyl)malonate (6f)**

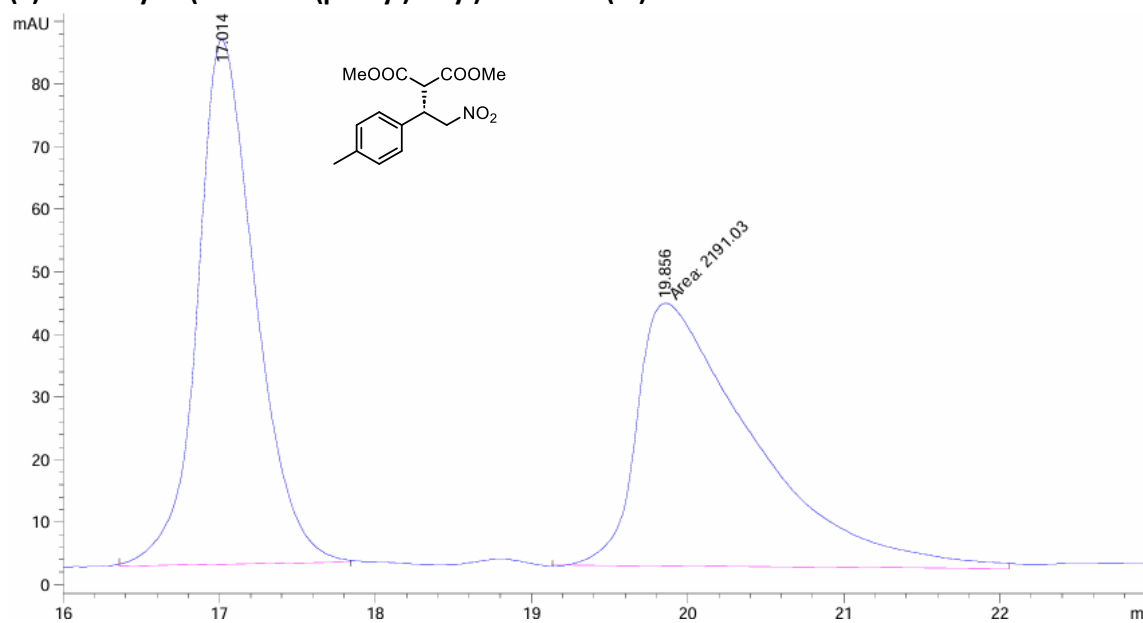

| Peak # | RetTime [min] | Type | Width [min] | Area [mAU*s] | Height [mAU] | Area %  |
|--------|---------------|------|-------------|--------------|--------------|---------|
| 1      | 17.014        | BB   | 0.3871      | 2163.00879   | 83.81332     | 49.6782 |
| 2      | 19.856        | MM   | 0.8702      | 2191.03101   | 41.96473     | 50.3218 |

Totals : 4354.03979 125.77804

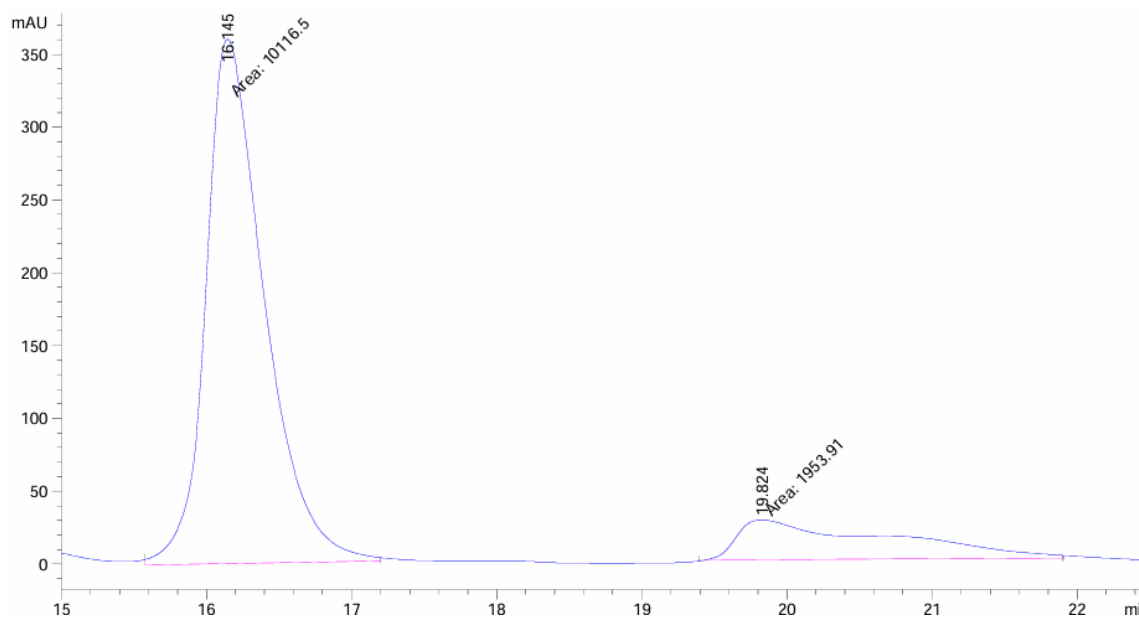

Signal 1: DAD1 B, Sig=254,16 Ref=360,100

| Peak # | RetTime [min] | Type | Width [min] | Area [mAU*s] | Height [mAU] | Area %  |
|--------|---------------|------|-------------|--------------|--------------|---------|
| 1      | 16.145        | MM   | 0.4683      | 1.01165e4    | 360.00928    | 83.8124 |
| 2      | 19.824        | MM   | 1.1887      | 1953.91248   | 27.39496     | 16.1876 |

Totals : 1.20705e4 387.40424

**(S)-dimethyl 2-(1-(4-methoxyphenyl)-2-nitroethyl)malonate (6g)**

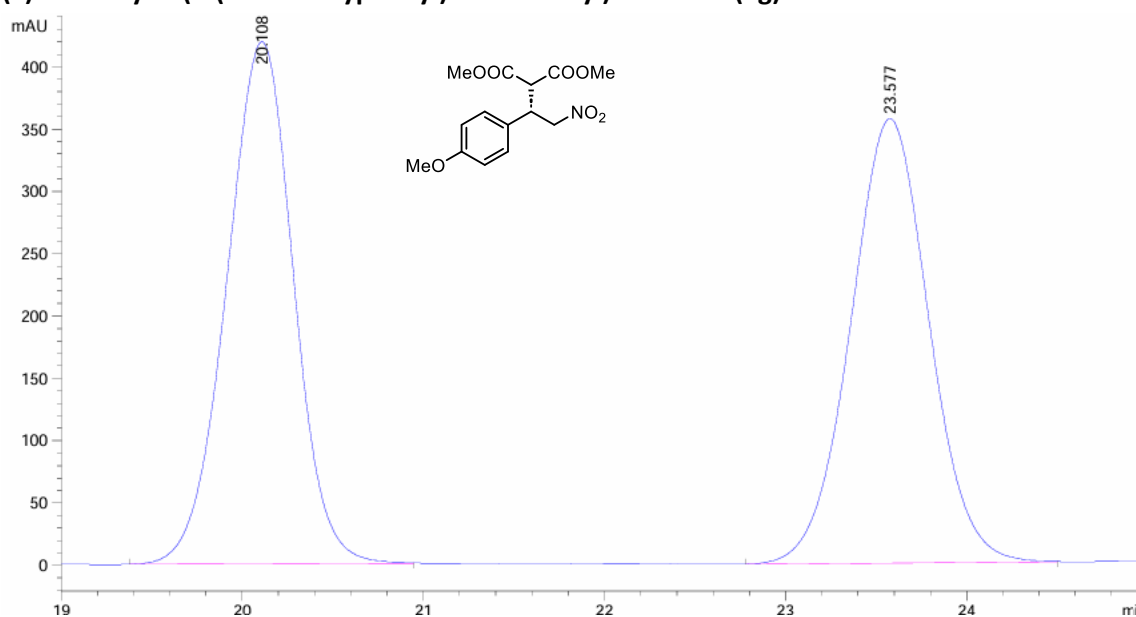

Signal 1: DAD1 A, Sig=254,4 Ref=360,100

| Peak # | RetTime [min] | Type | Width [min] | Area [mAU*s] | Height [mAU] | Area %  |
|--------|---------------|------|-------------|--------------|--------------|---------|
| 1      | 20.108        | BB   | 0.3997      | 1.07658e4    | 419.02090    | 50.1148 |
| 2      | 23.577        | BB   | 0.4646      | 1.07165e4    | 356.56686    | 49.8852 |

Totals : 2.14822e4 775.58777

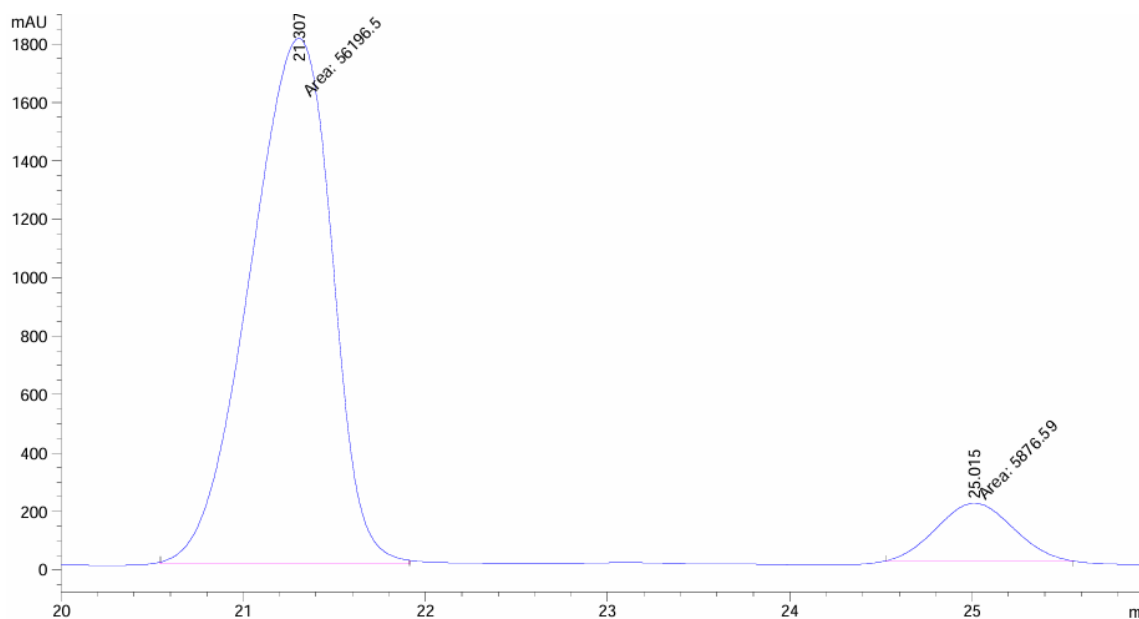

Signal 1: DAD1 B, Sig=254,16 Ref=360,100

| Peak # | RetTime [min] | Type | Width [min] | Area [mAU*s] | Height [mAU] | Area %  |
|--------|---------------|------|-------------|--------------|--------------|---------|
| 1      | 21.307        | MM   | 0.5208      | 5.61965e4    | 1798.35657   | 90.5328 |
| 2      | 25.015        | MM   | 0.4904      | 5876.58643   | 199.72989    | 9.4672  |

Totals : 6.20731e4 1998.08646

### (S)-dimethyl 2-(1-(4-hydroxyphenyl)-2-nitroethyl)malonate (6h)

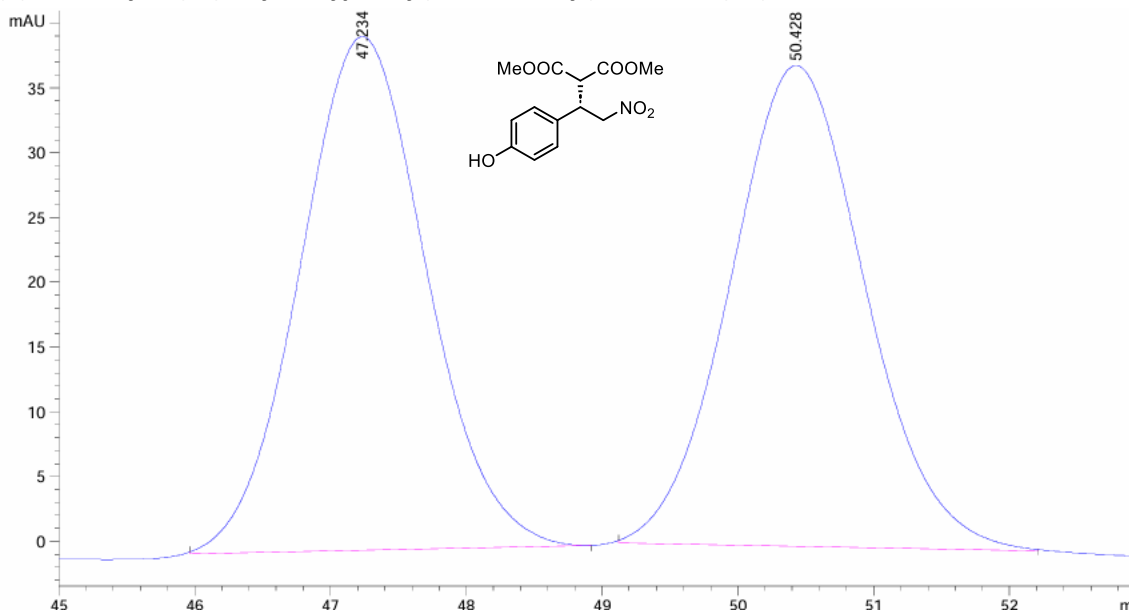

Signal 1: DAD1 B, Sig=254,16 Ref=360,100

| Peak # | RetTime [min] | Type | Width [min] | Area [mAU*s] | Height [mAU] | Area %  |
|--------|---------------|------|-------------|--------------|--------------|---------|
| 1      | 47.234        | BB   | 1.0009      | 2560.21094   | 39.66983     | 50.0256 |
| 2      | 50.428        | BB   | 1.0638      | 2557.59497   | 37.12057     | 49.9744 |

Totals : 5117.80591 76.79041



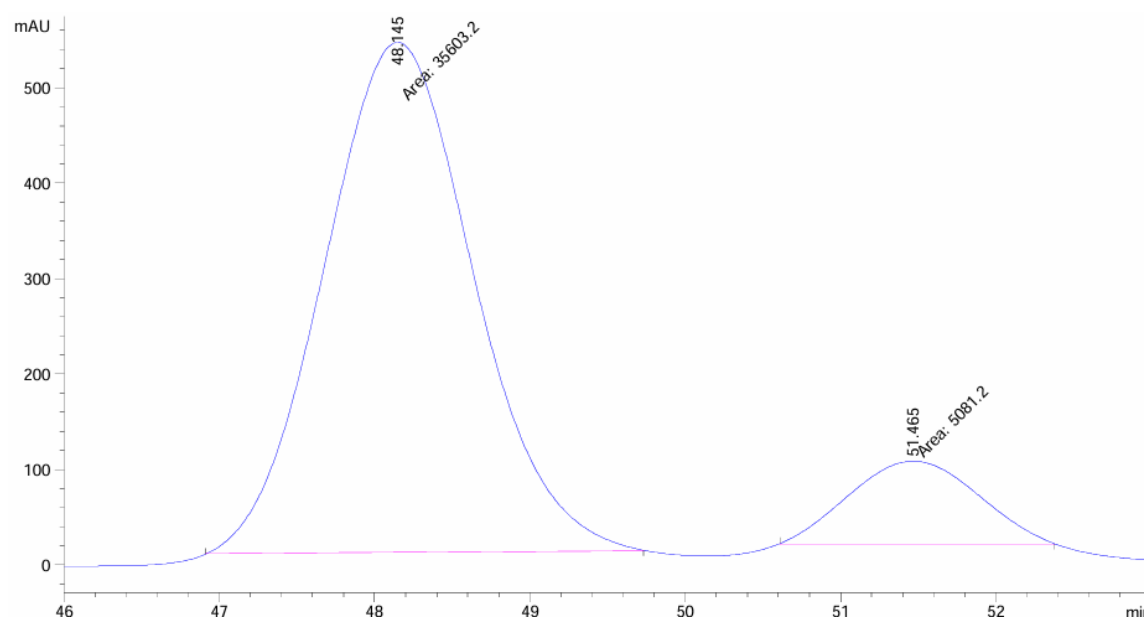

Signal 1: DAD1 B, Sig=254,16 Ref=360,100

| Peak # | RetTime [min] | Type | Width [min] | Area [mAU*s] | Height [mAU] | Area %  |
|--------|---------------|------|-------------|--------------|--------------|---------|
| 1      | 48.145        | MM   | 1.1110      | 3.56032e4    | 534.12360    | 87.5107 |
| 2      | 51.465        | MM   | 0.9644      | 5081.19775   | 87.80897     | 12.4893 |

Totals : 4.06844e4 621.93256

# NMR spectra of 3

Tert-butyl (*E*)-benzylidenecarbamate (3a) (CDCl<sub>3</sub>, <sup>1</sup>H 400 MHz, <sup>13</sup>C 101 MHz)

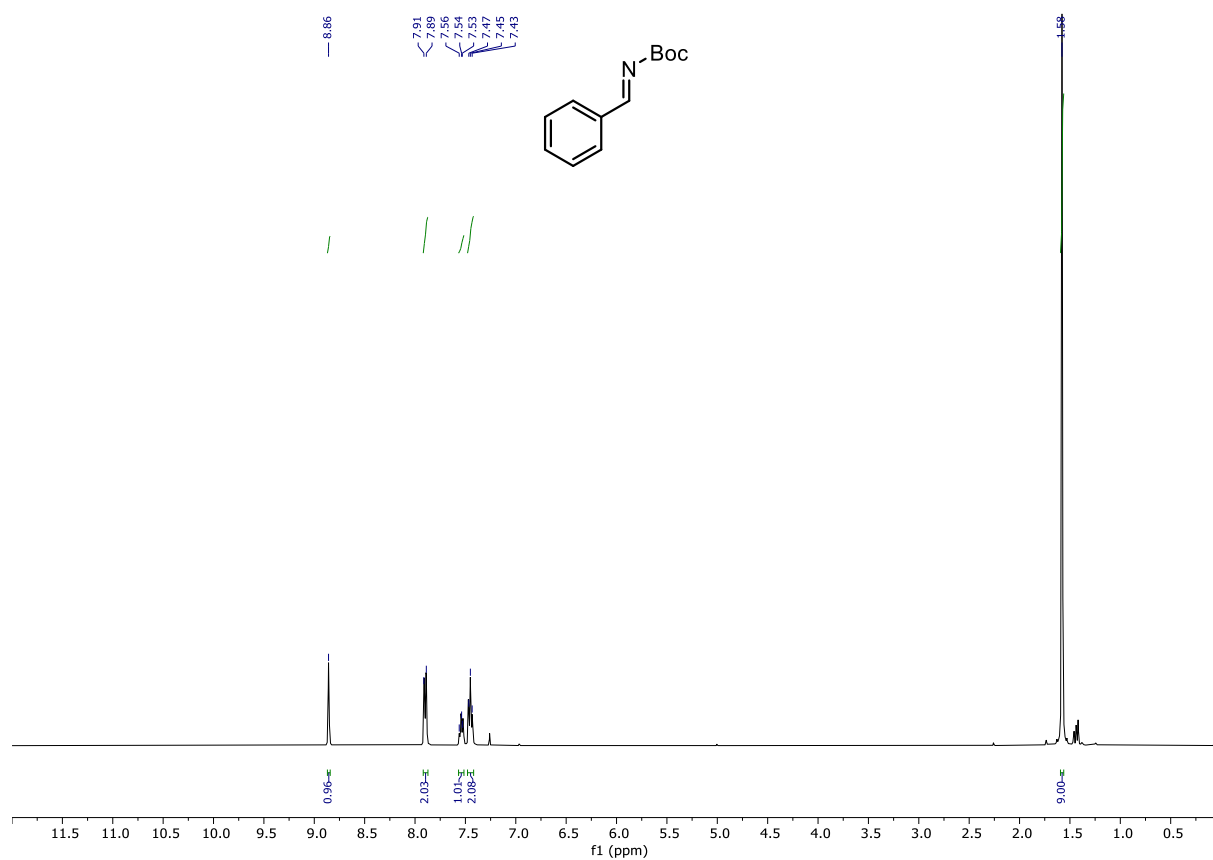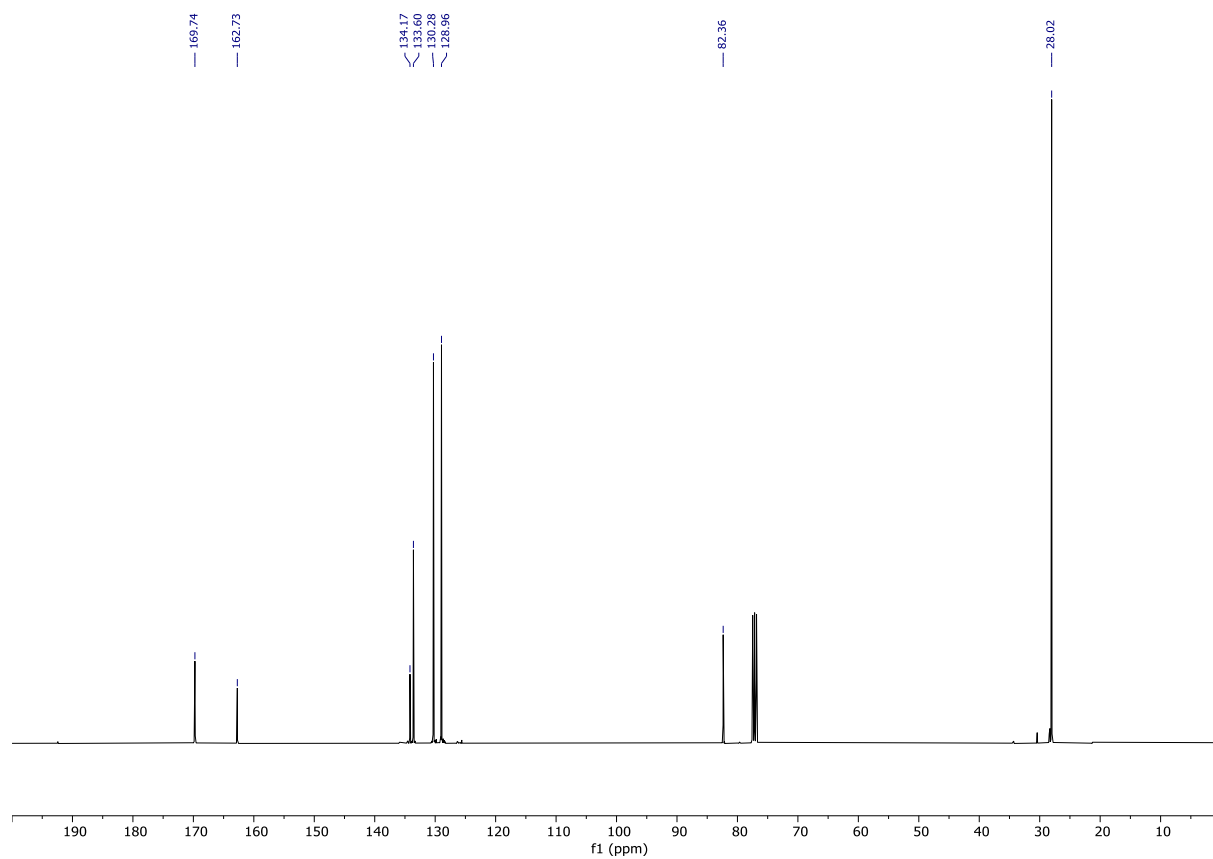

**Tert-butyl (*E*)-(4-chlorobenzylidene)carbamate (3b) (CDCl<sub>3</sub>, <sup>1</sup>H 400 MHz, <sup>13</sup>C 101 MHz)**

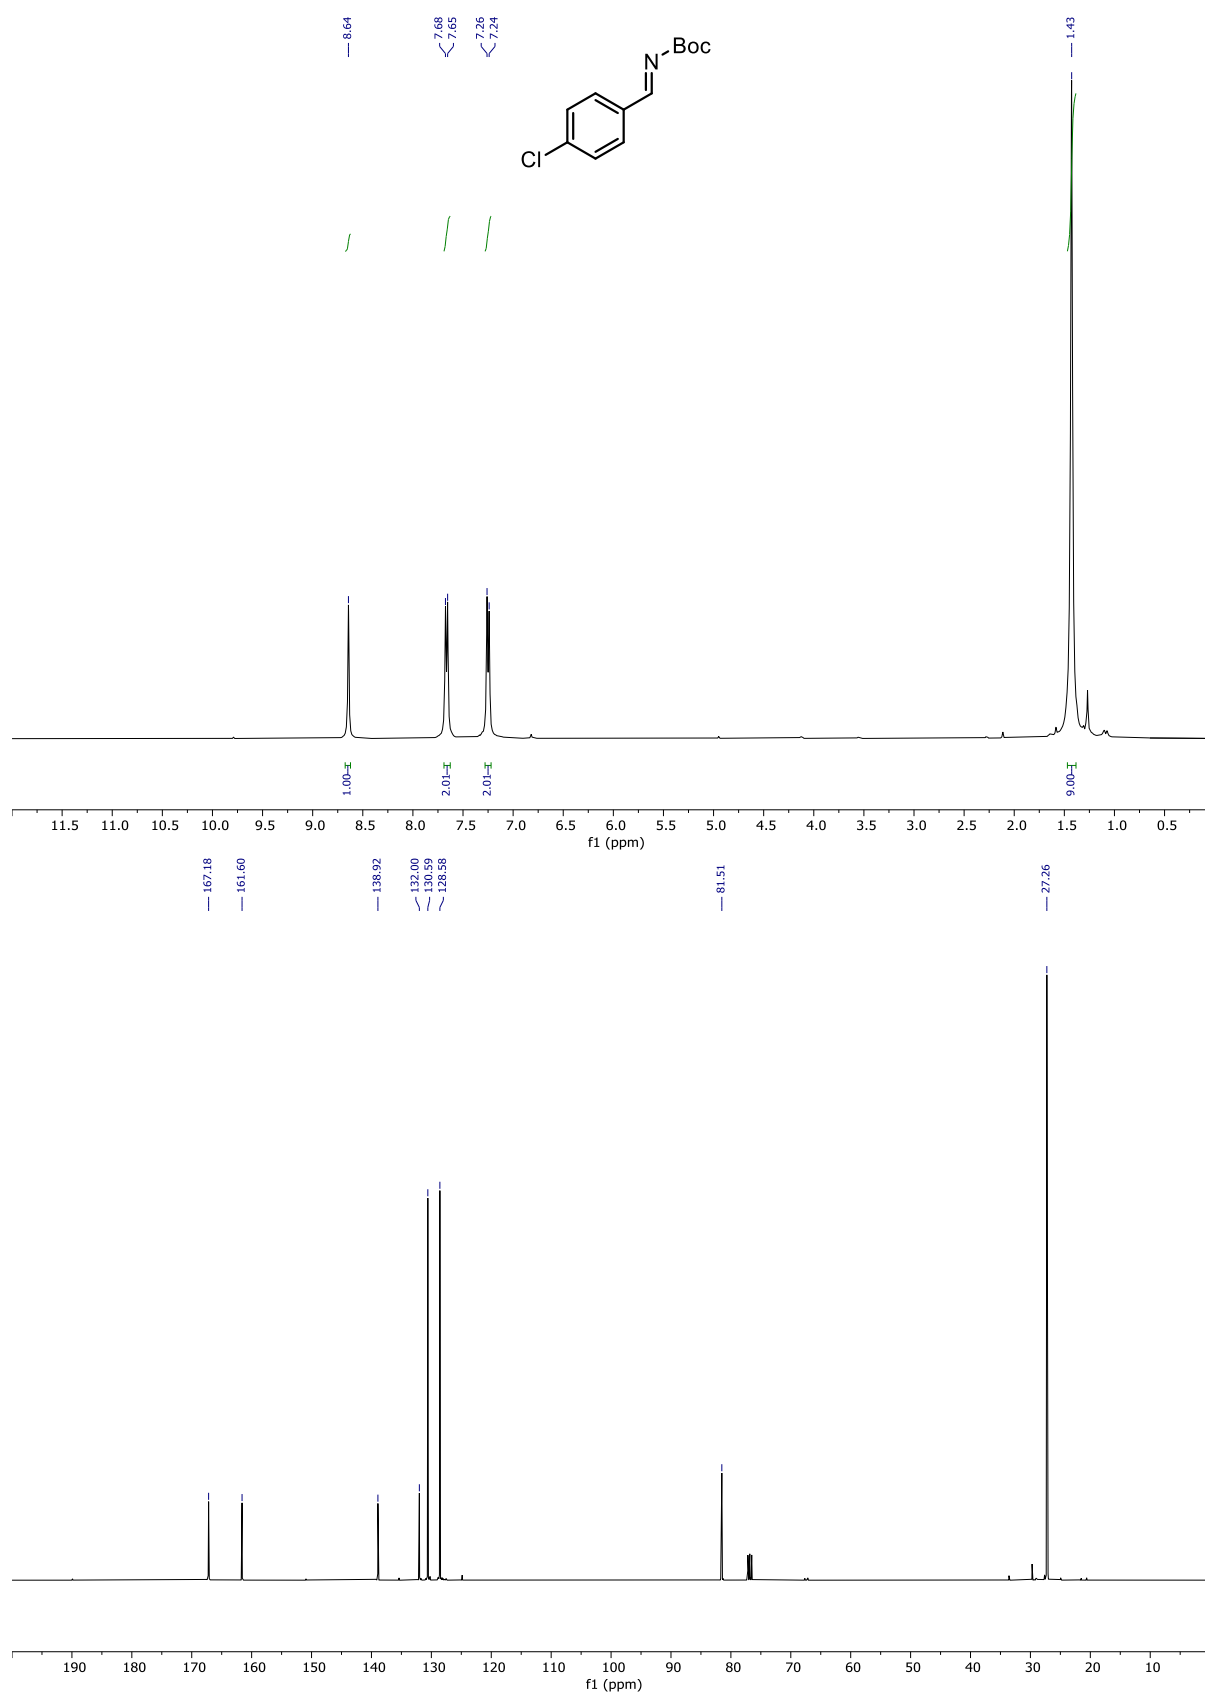

Tert-butyl (*E*)-(3-chlorobenzylidene)carbamate (**3c**) (CDCl<sub>3</sub>, <sup>1</sup>H 400 MHz, <sup>13</sup>C 101 MHz)

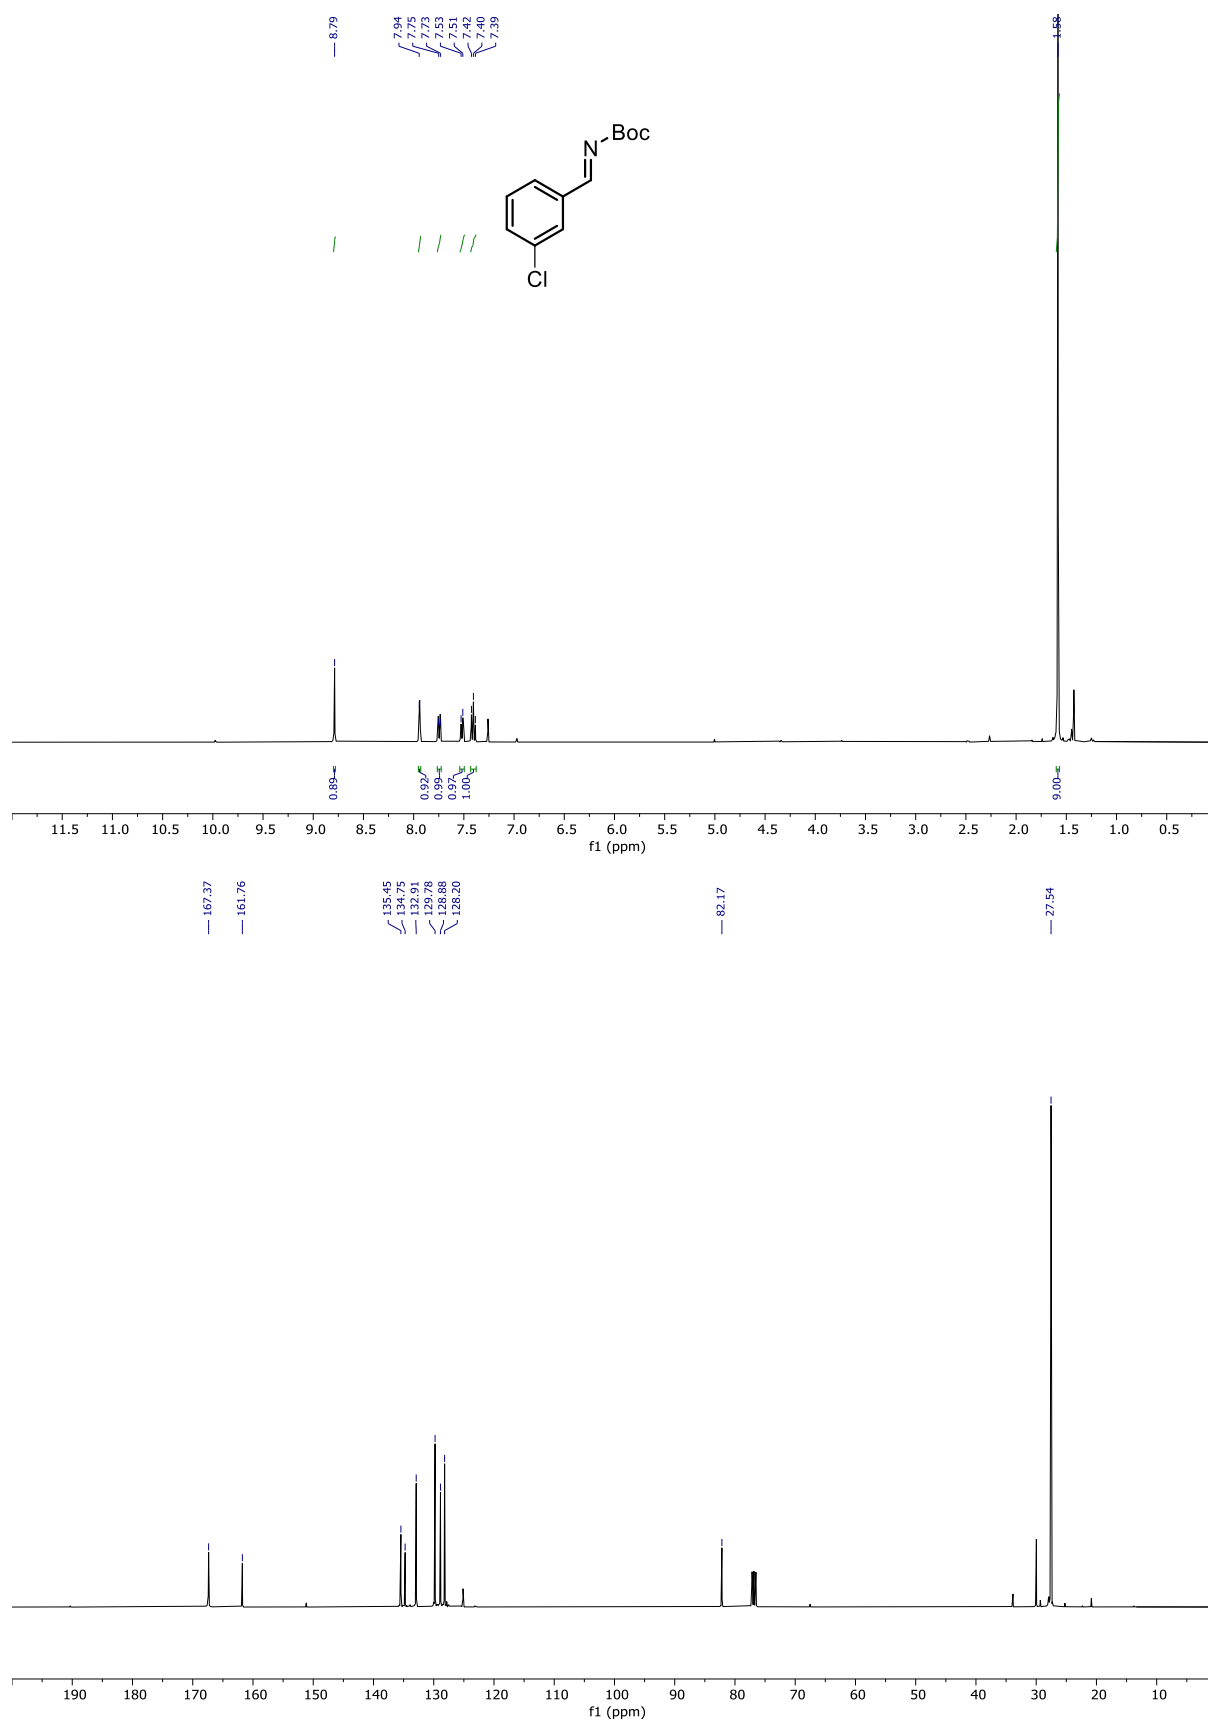

**Tert-butyl (*E*)-(2-chlorobenzylidene)carbamate (3d) (CDCl<sub>3</sub>, <sup>1</sup>H 400 MHz, <sup>13</sup>C 101 MHz)**

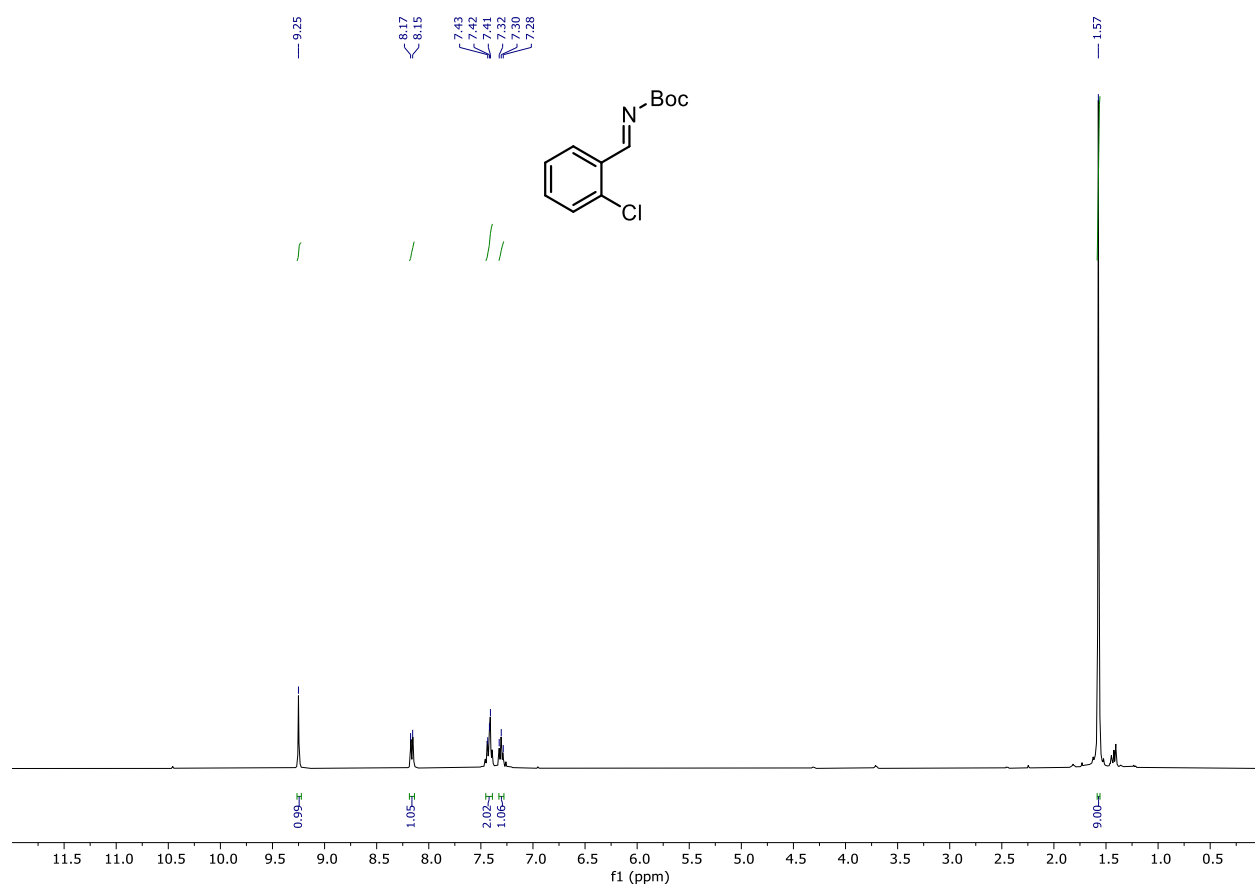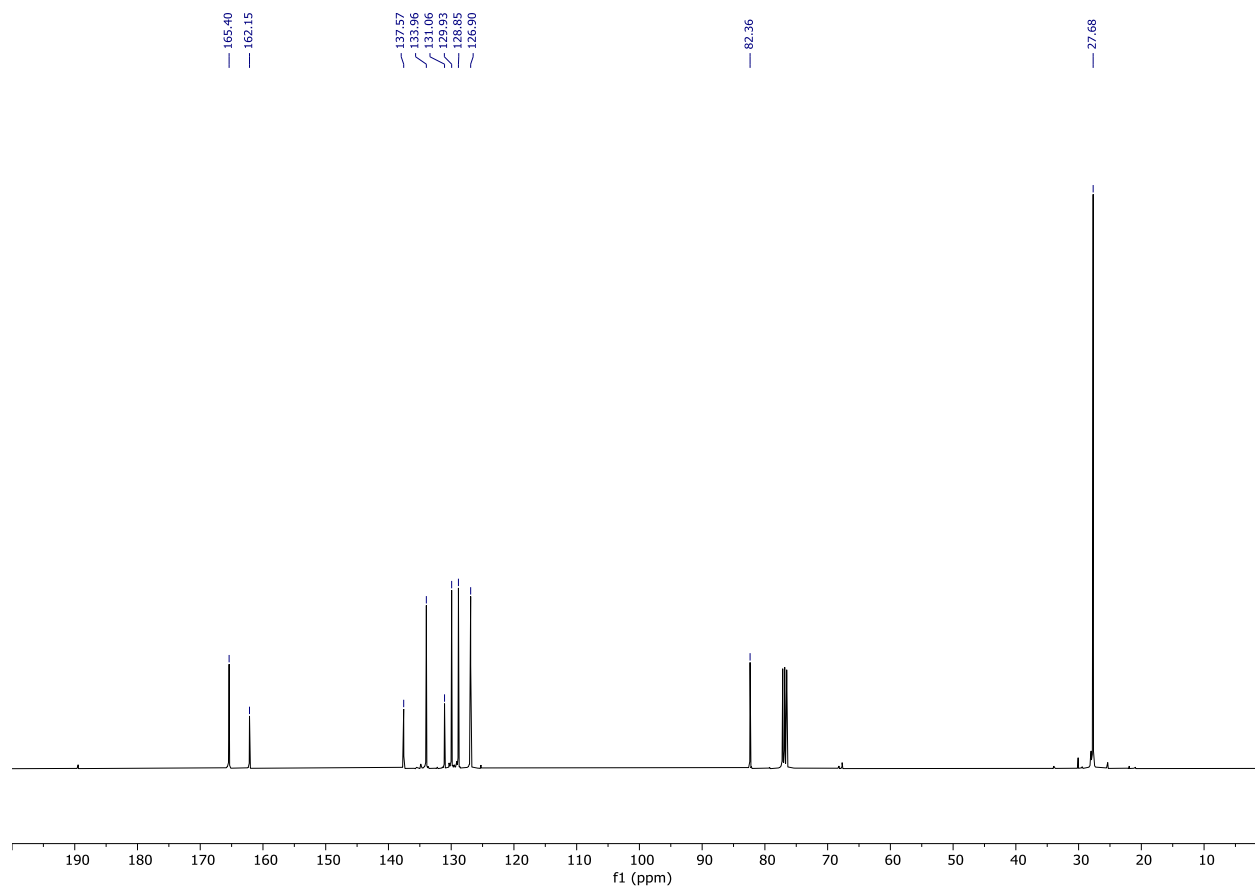

Tert-butyl (*E*)-(naphthalen-1-ylmethylene)carbamate (3e) (CDCl<sub>3</sub>, <sup>1</sup>H 400 MHz, <sup>13</sup>C 101 MHz)

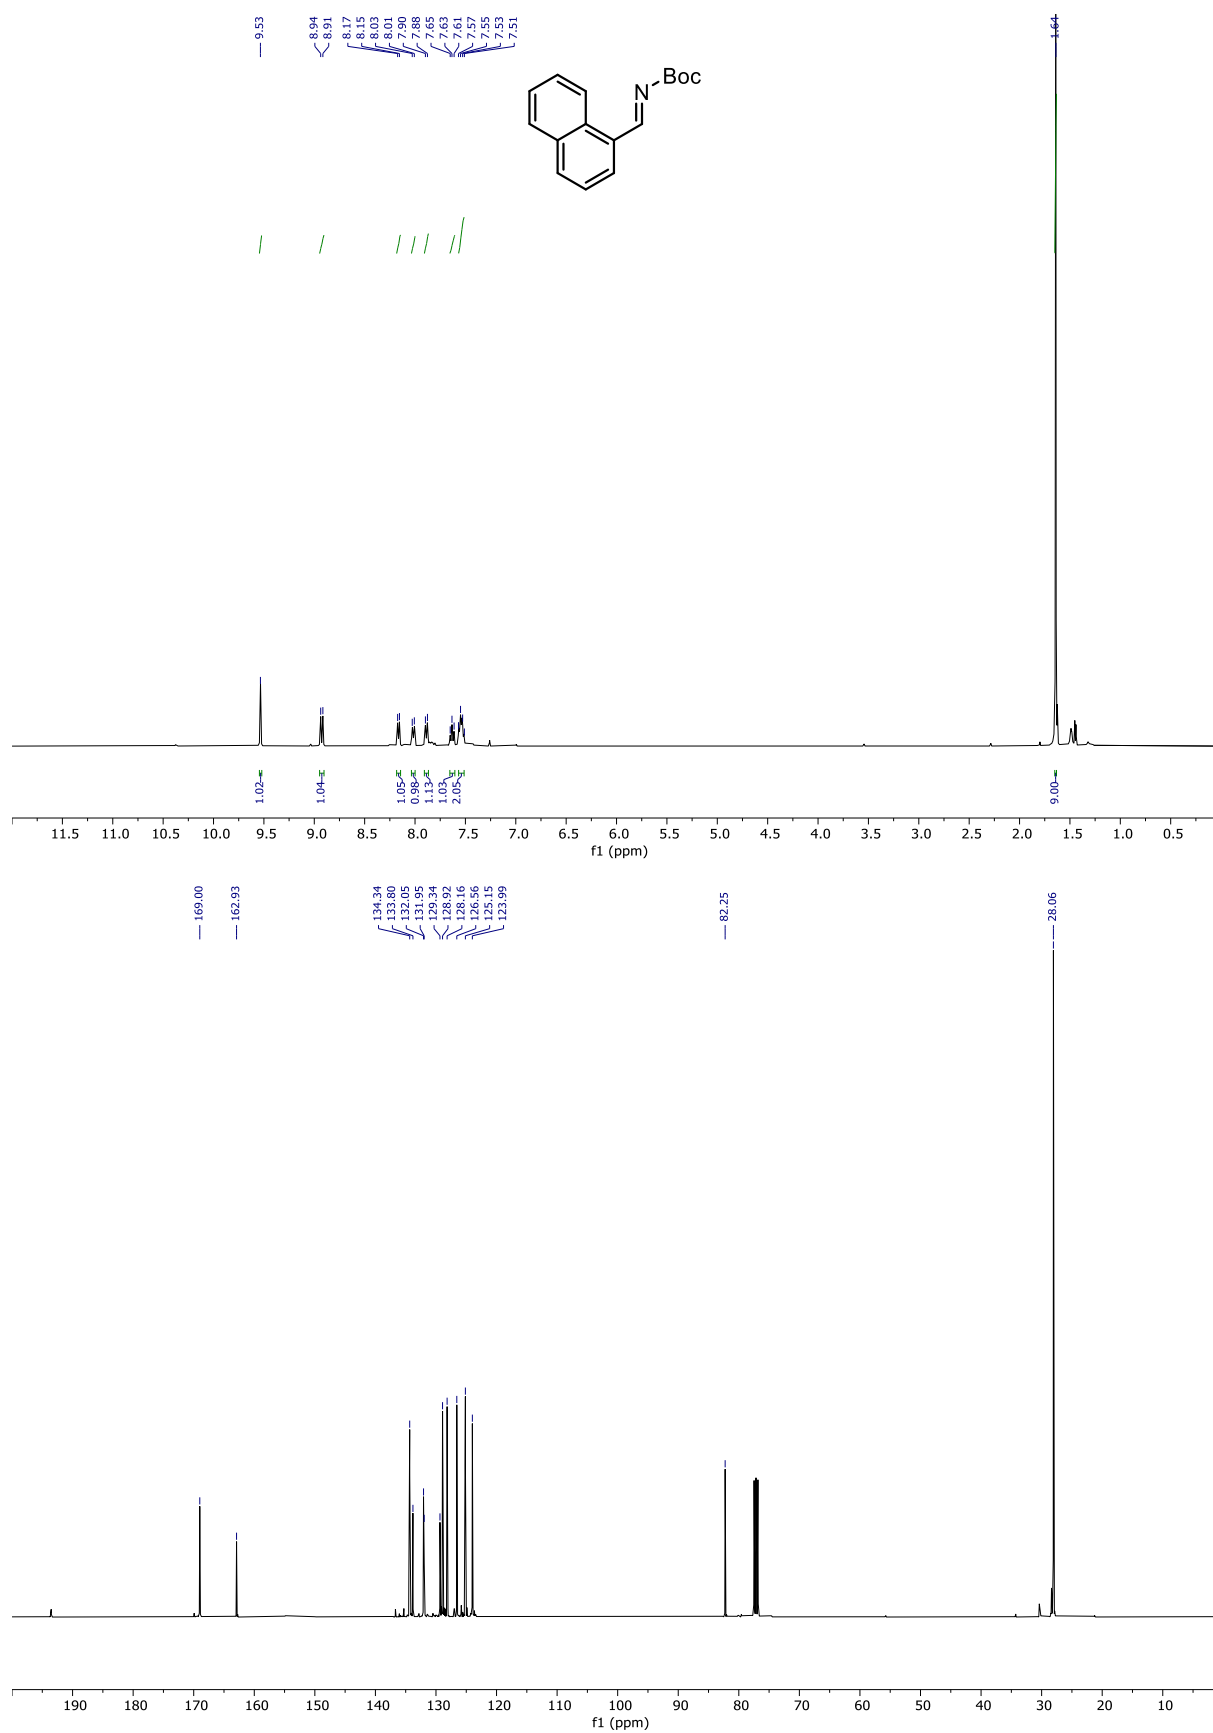

Tert-butyl (*E*)-(naphthalen-2-ylmethylene)carbamate (**3f**) (CDCl<sub>3</sub>, <sup>1</sup>H 400 MHz, <sup>13</sup>C 101 MHz)

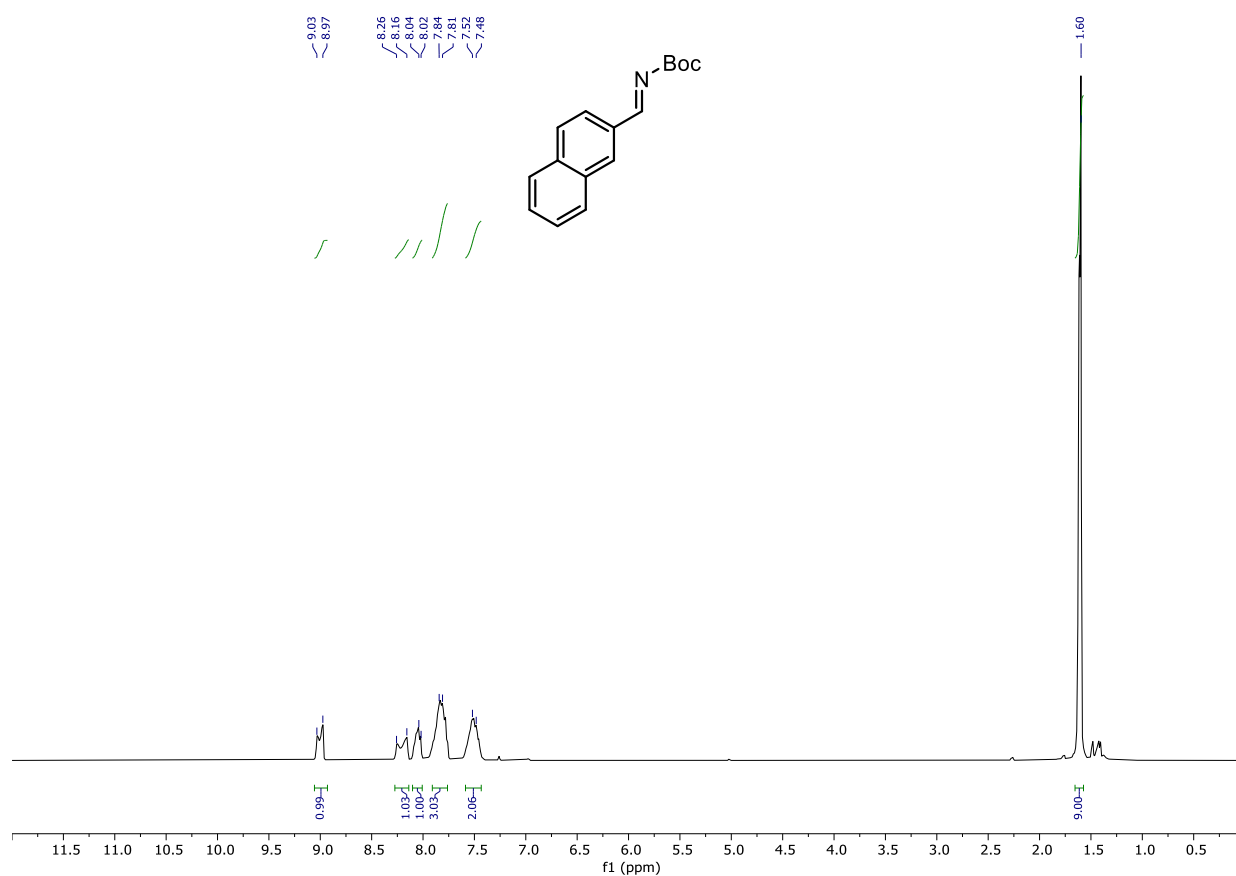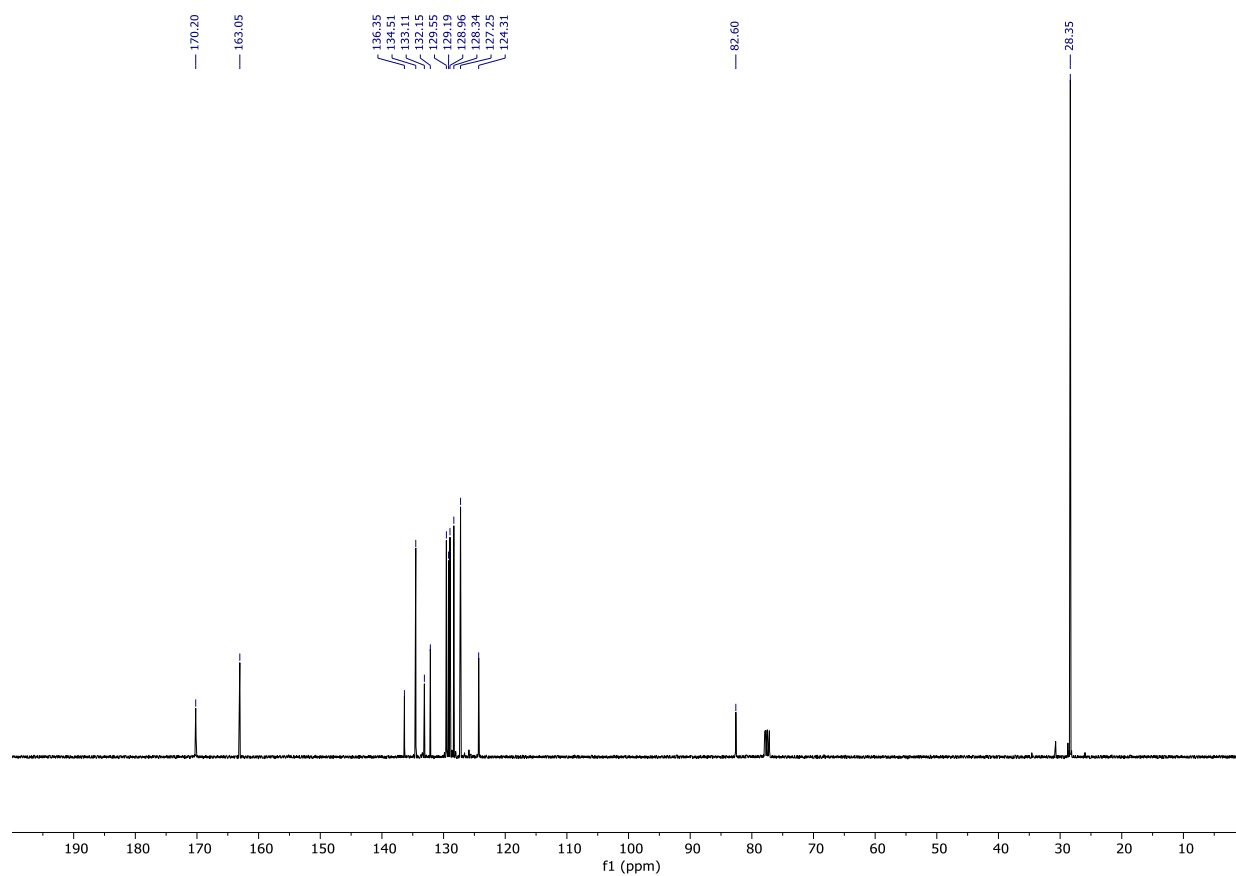

Tert-butyl (*E*)-(pyridin-3-ylmethylene)carbamate (3g) (CDCl<sub>3</sub>, <sup>1</sup>H 400 MHz, <sup>13</sup>C 101 MHz)

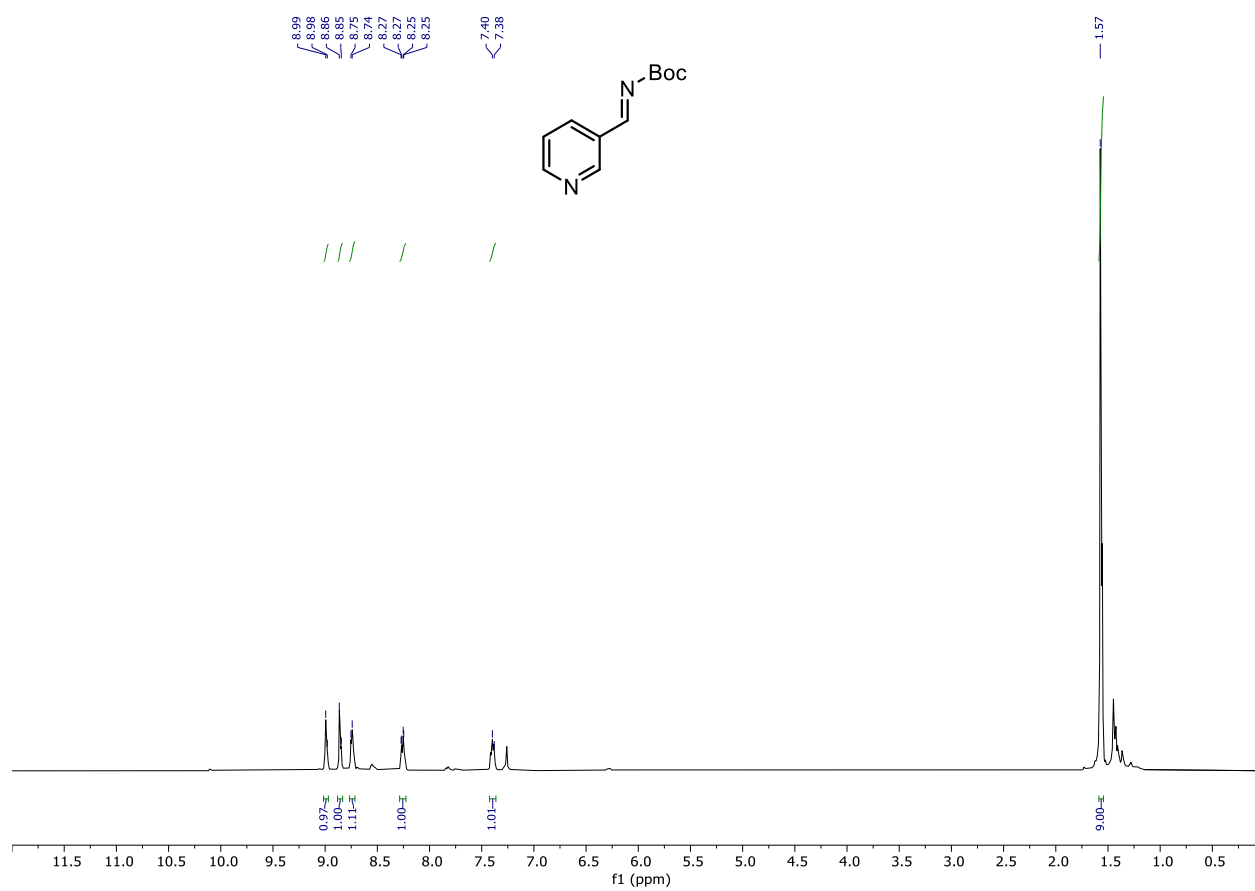



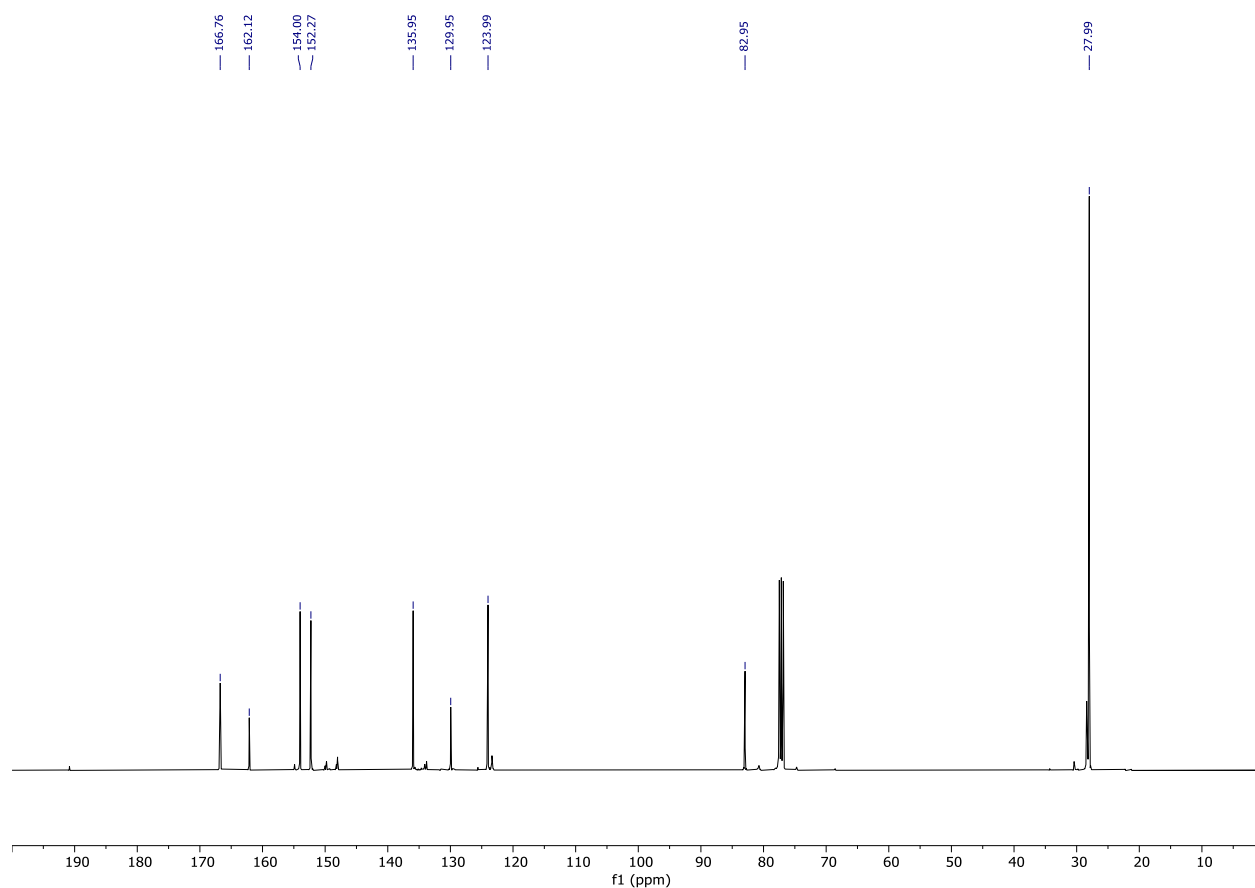

**Tert-butyl (*E*)-(thiophen-2-ylmethylene)carbamate (3h) (CDCl<sub>3</sub>, <sup>1</sup>H 400 MHz, <sup>13</sup>C 101 MHz)**

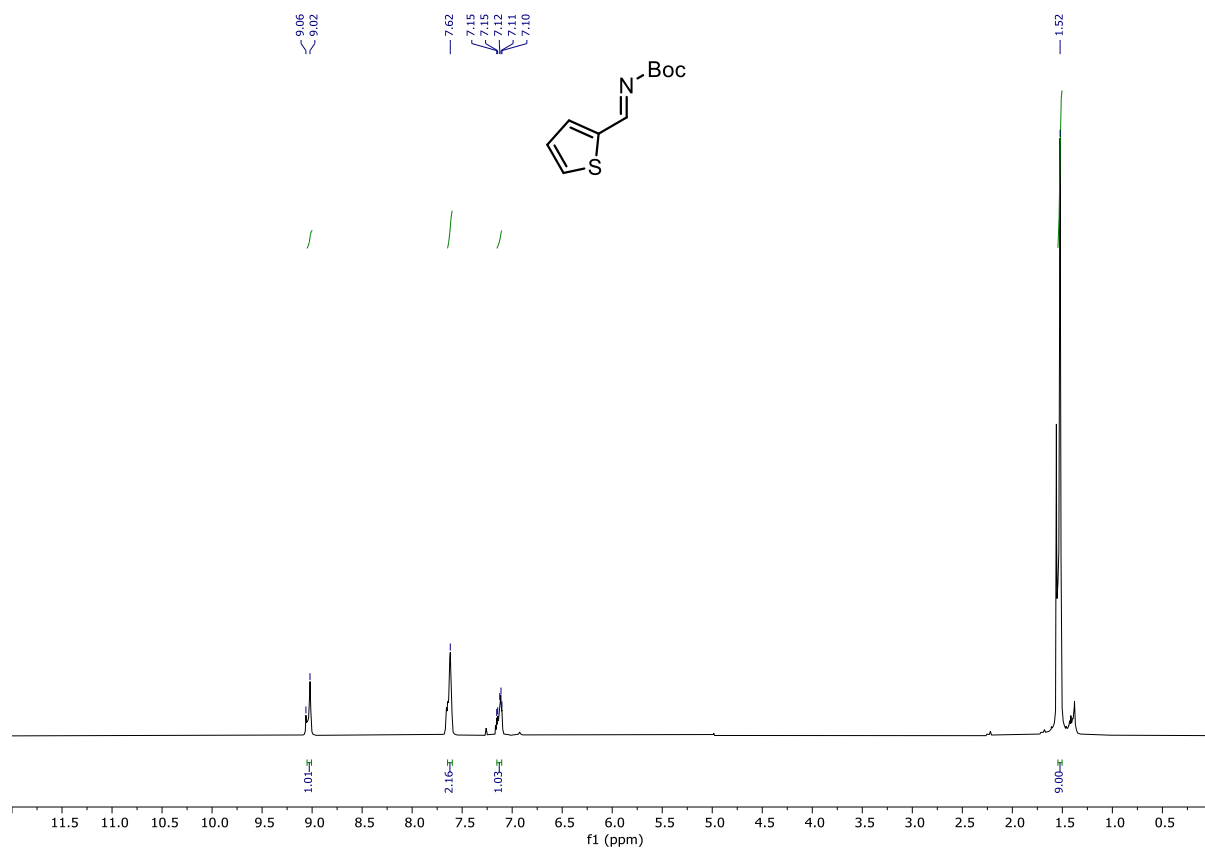

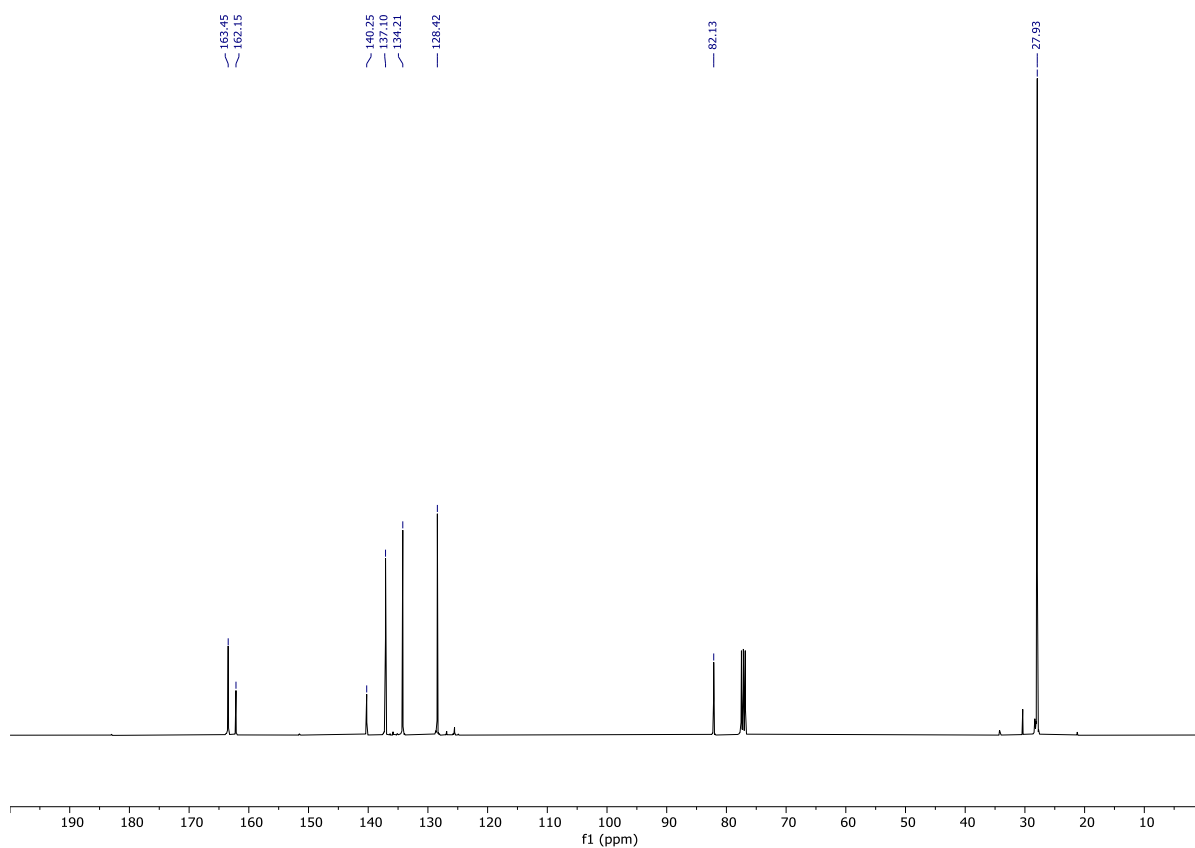

**Tert-butyl (E)-(2-bromobenzylidene)carbamate (3i) (CDCl<sub>3</sub>, <sup>1</sup>H 400 MHz, <sup>13</sup>C 101 MHz)**

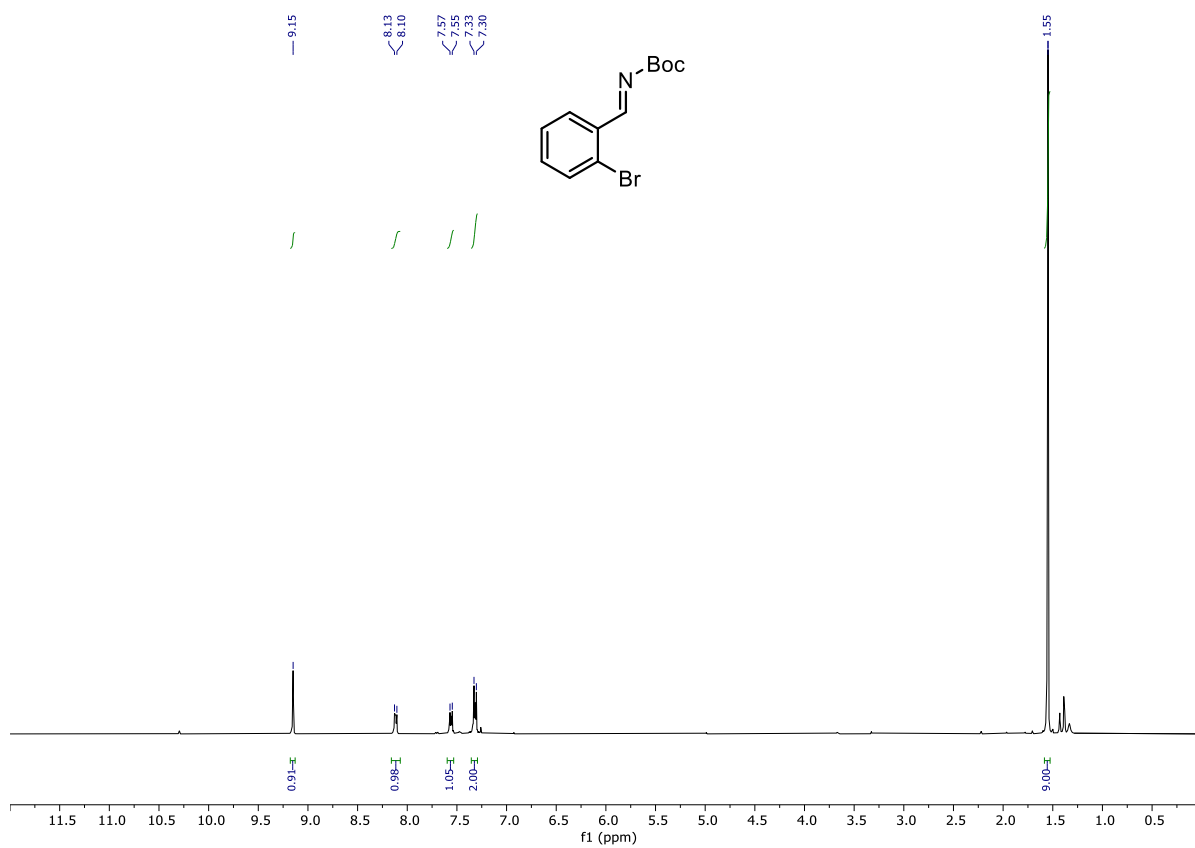

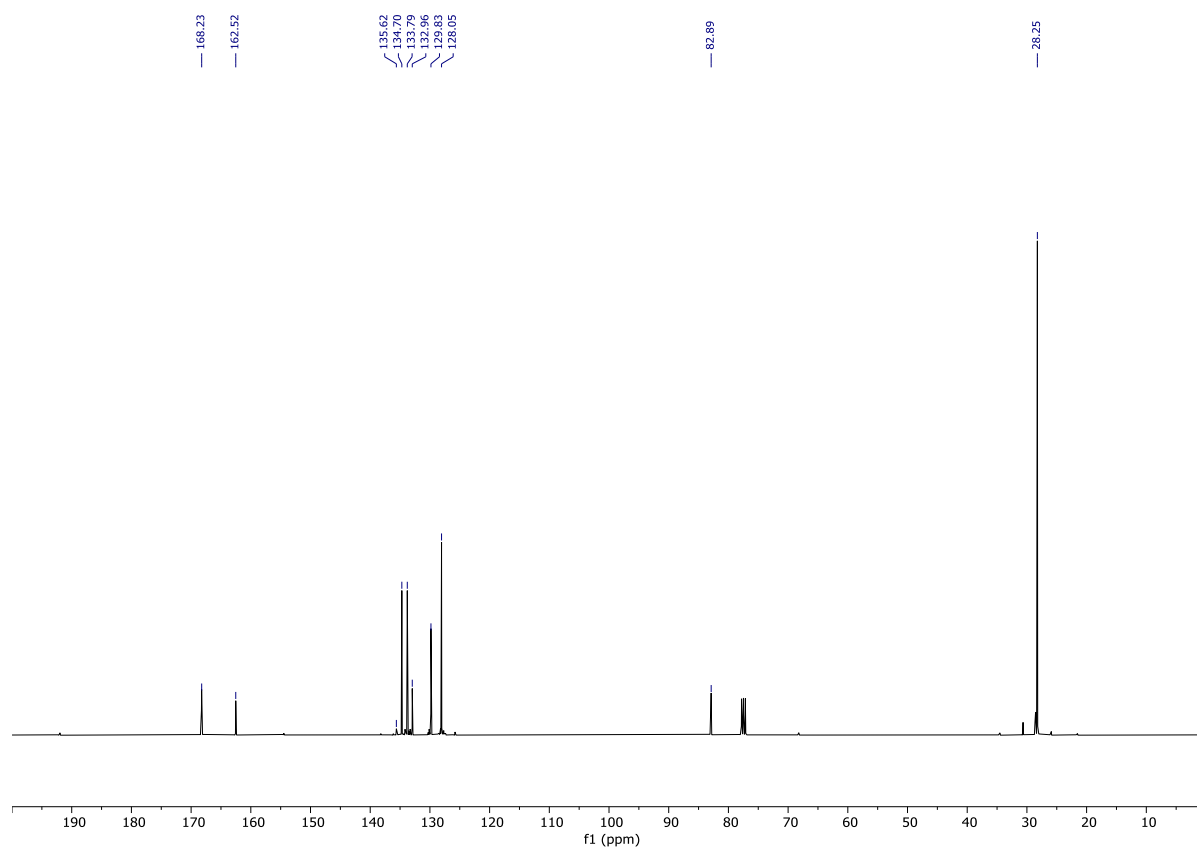

**Tert-butyl (*E*)-(4-methylbenzylidene)carbamate (3j) (CDCl<sub>3</sub>, <sup>1</sup>H 400 MHz, <sup>13</sup>C 101 MHz)**

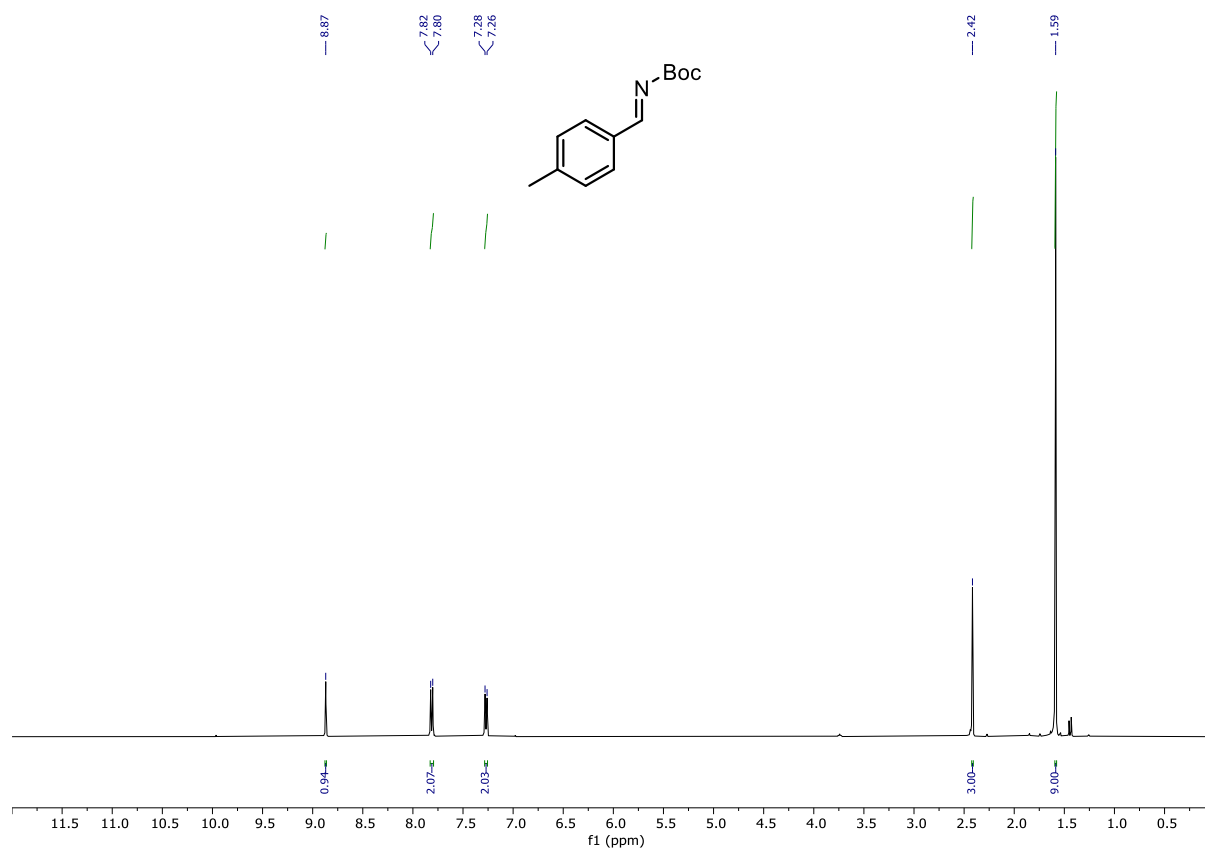

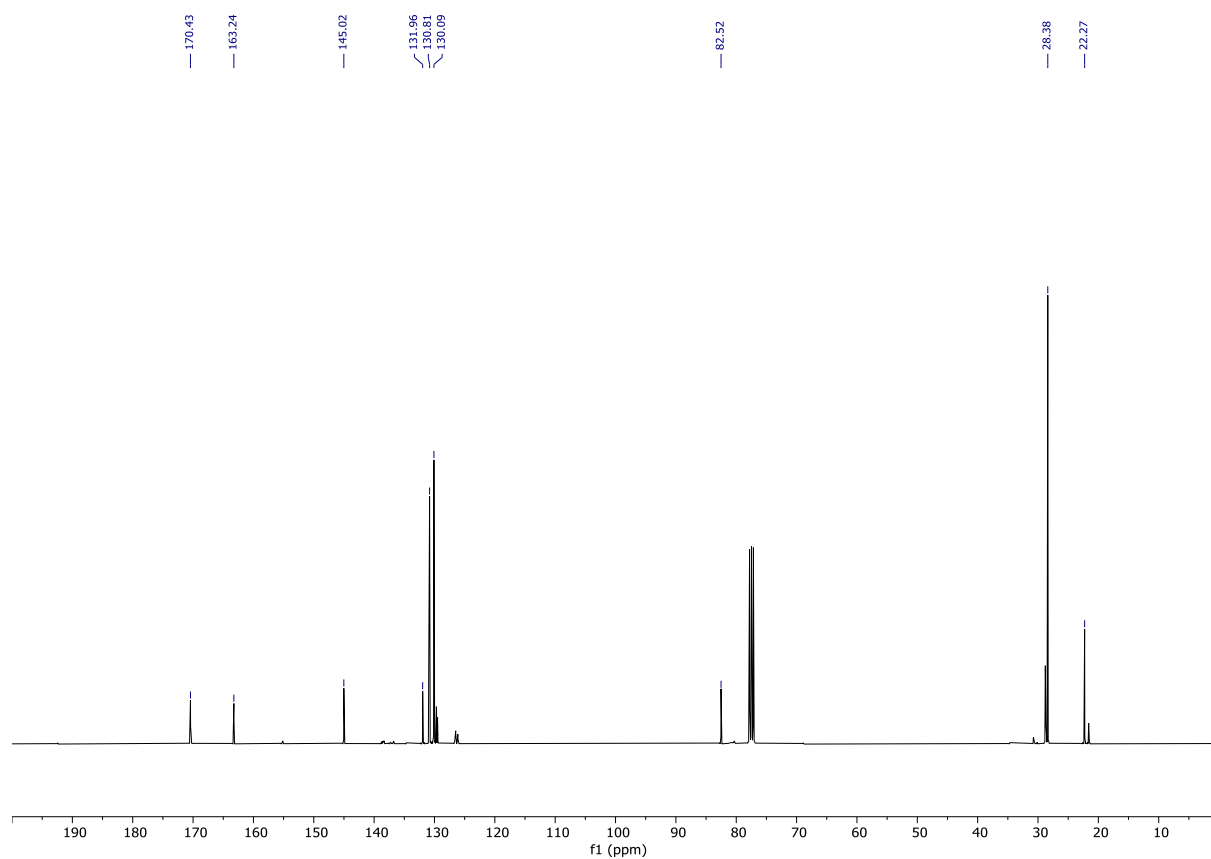

**Tert-butyl (*E*)-(4-(trifluoromethyl)benzylidene)carbamate (3k) (CDCl<sub>3</sub>, <sup>1</sup>H 400 MHz, <sup>13</sup>C 101 MHz, <sup>19</sup>F 376 MHz)**

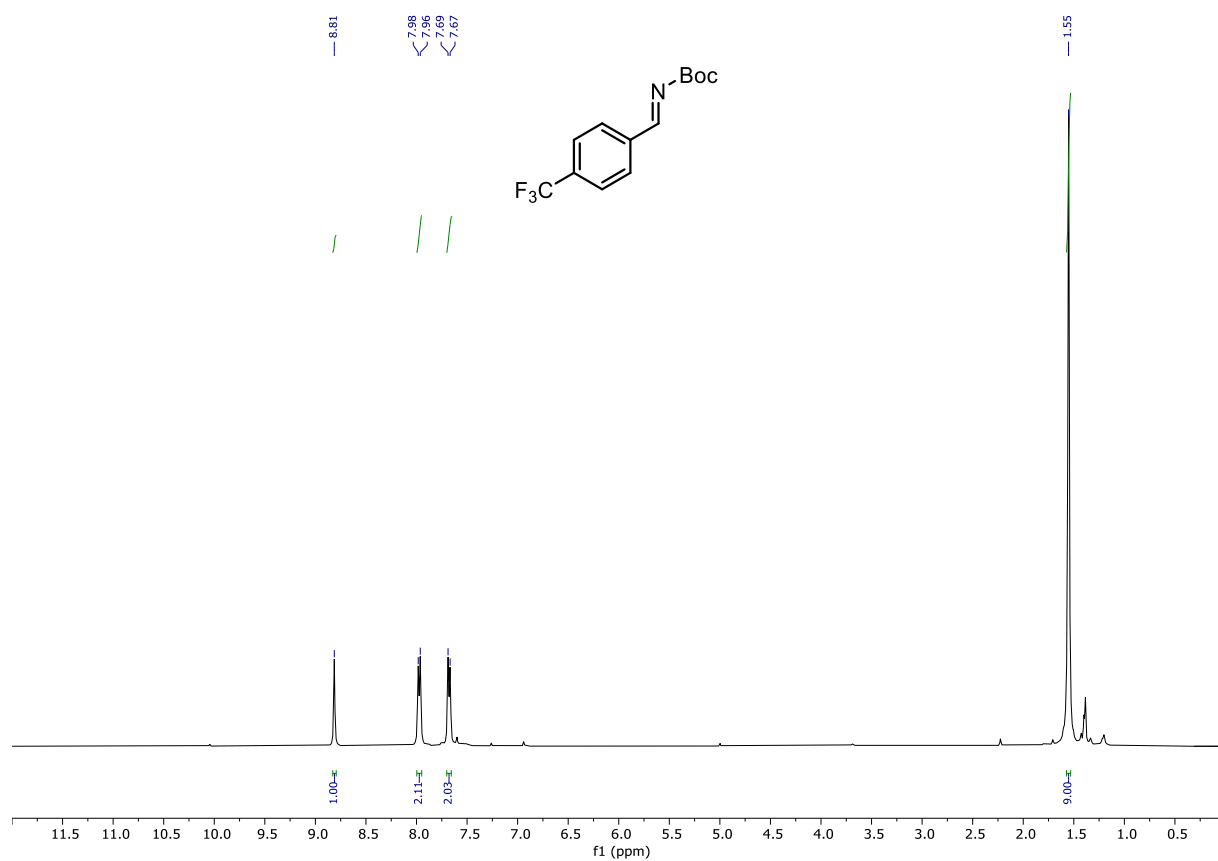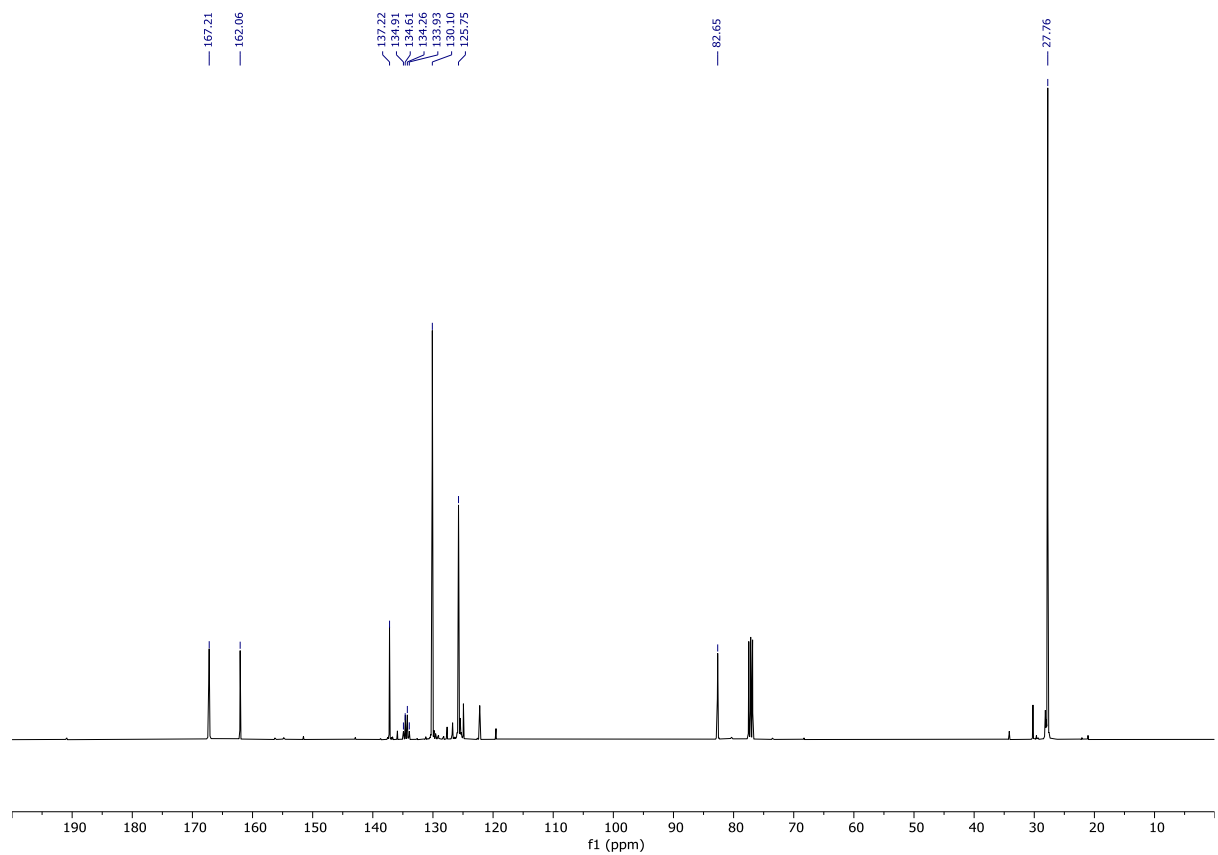

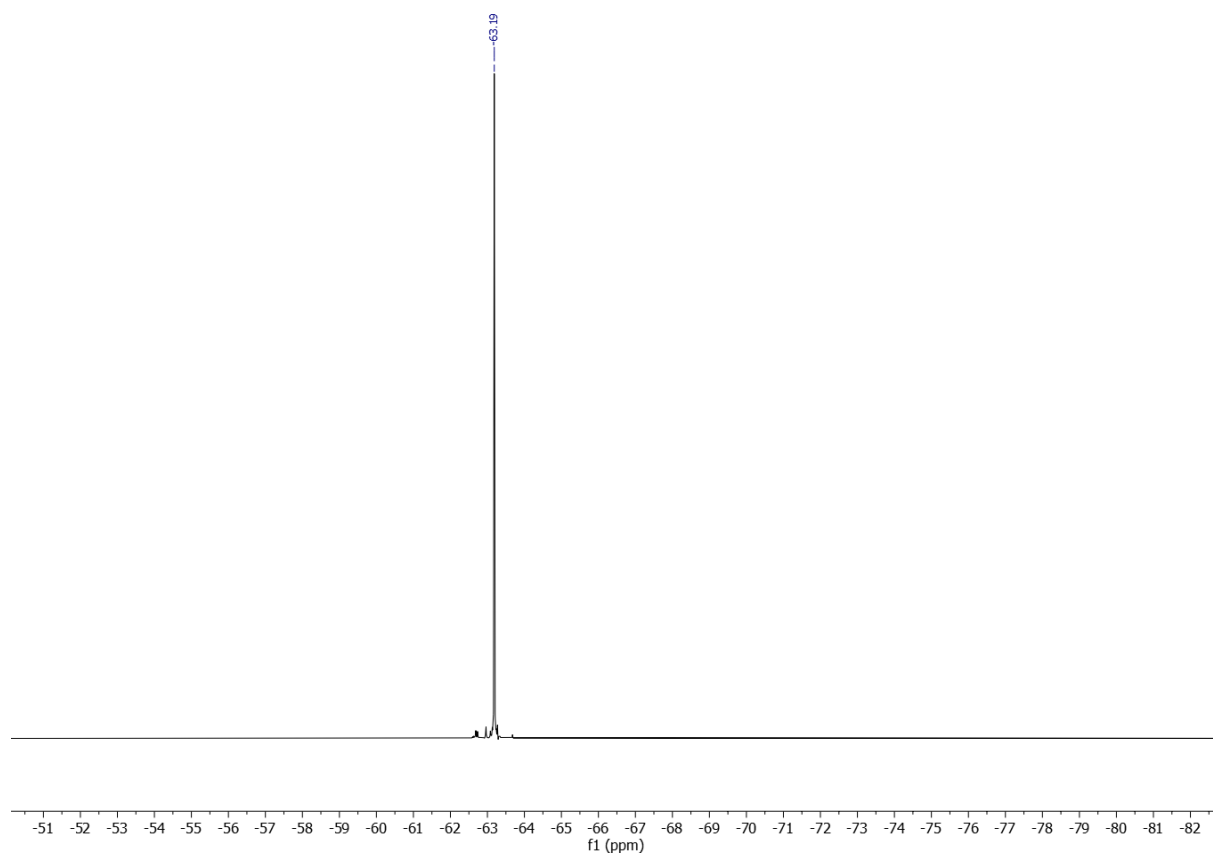

Tert-butyl (*E*)-(furan-2-ylmethylene)carbamate (3l) (CDCl<sub>3</sub>, <sup>1</sup>H 400 MHz, <sup>13</sup>C 101 MHz)

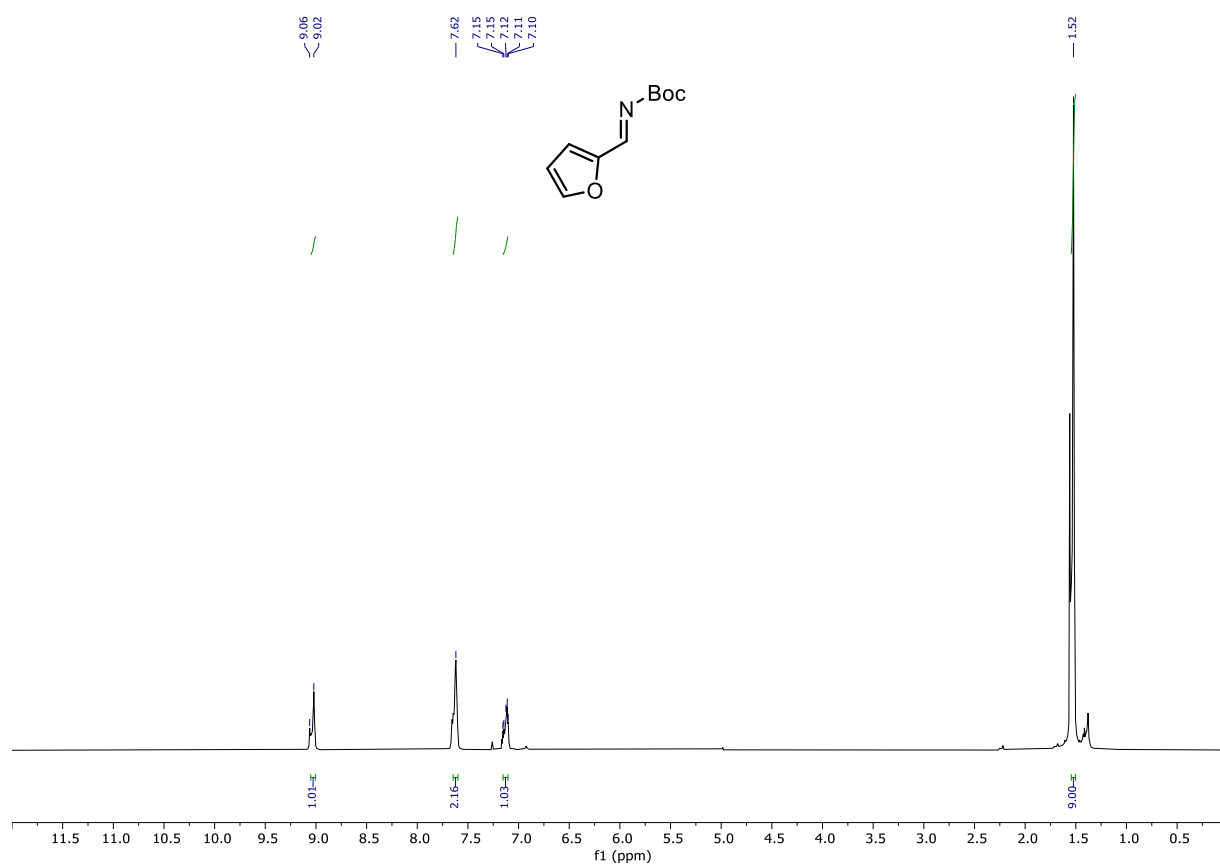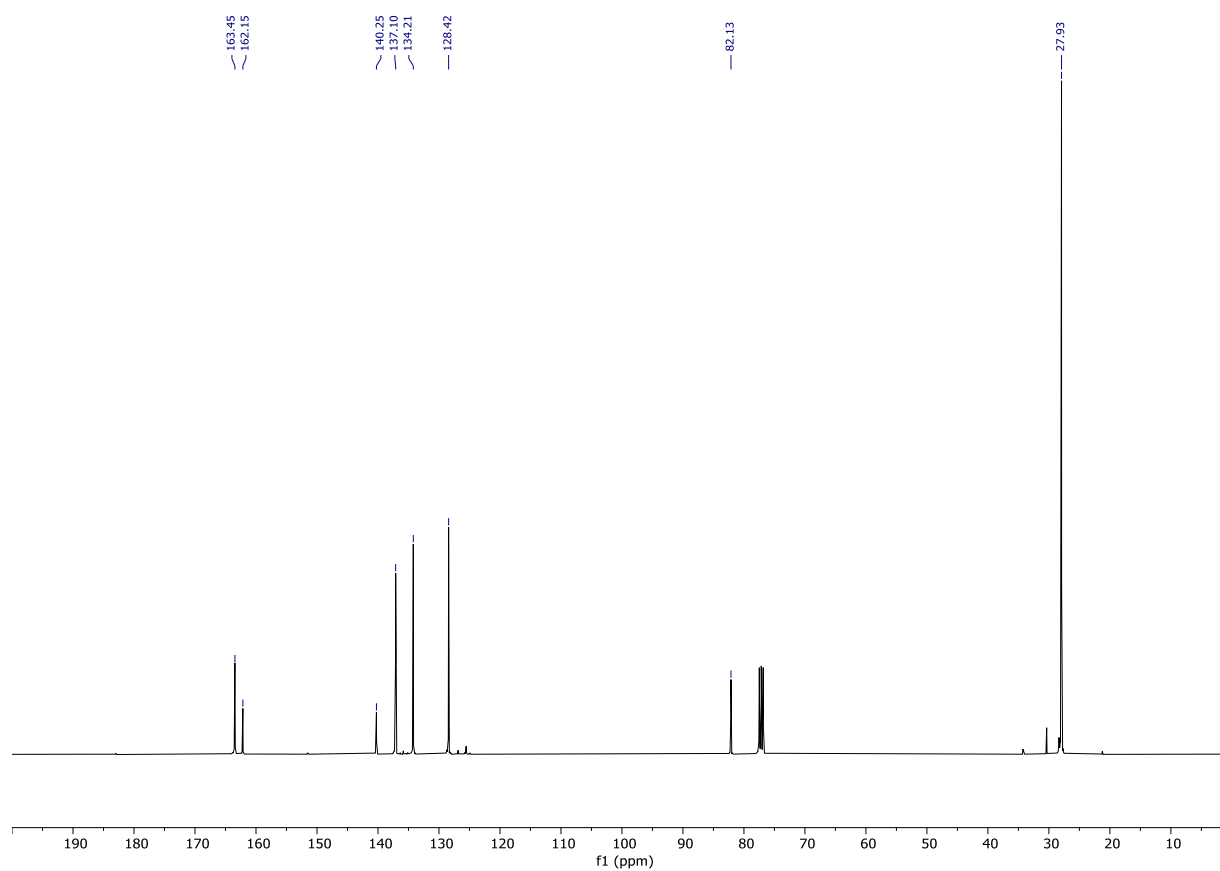

# NMR spectra of 4

Tert-butyl (*R*)-(2-nitro-1-phenylethyl)carbamate (**4a**) (CDCl<sub>3</sub>, <sup>1</sup>H 400 MHz, <sup>13</sup>C 101 MHz)

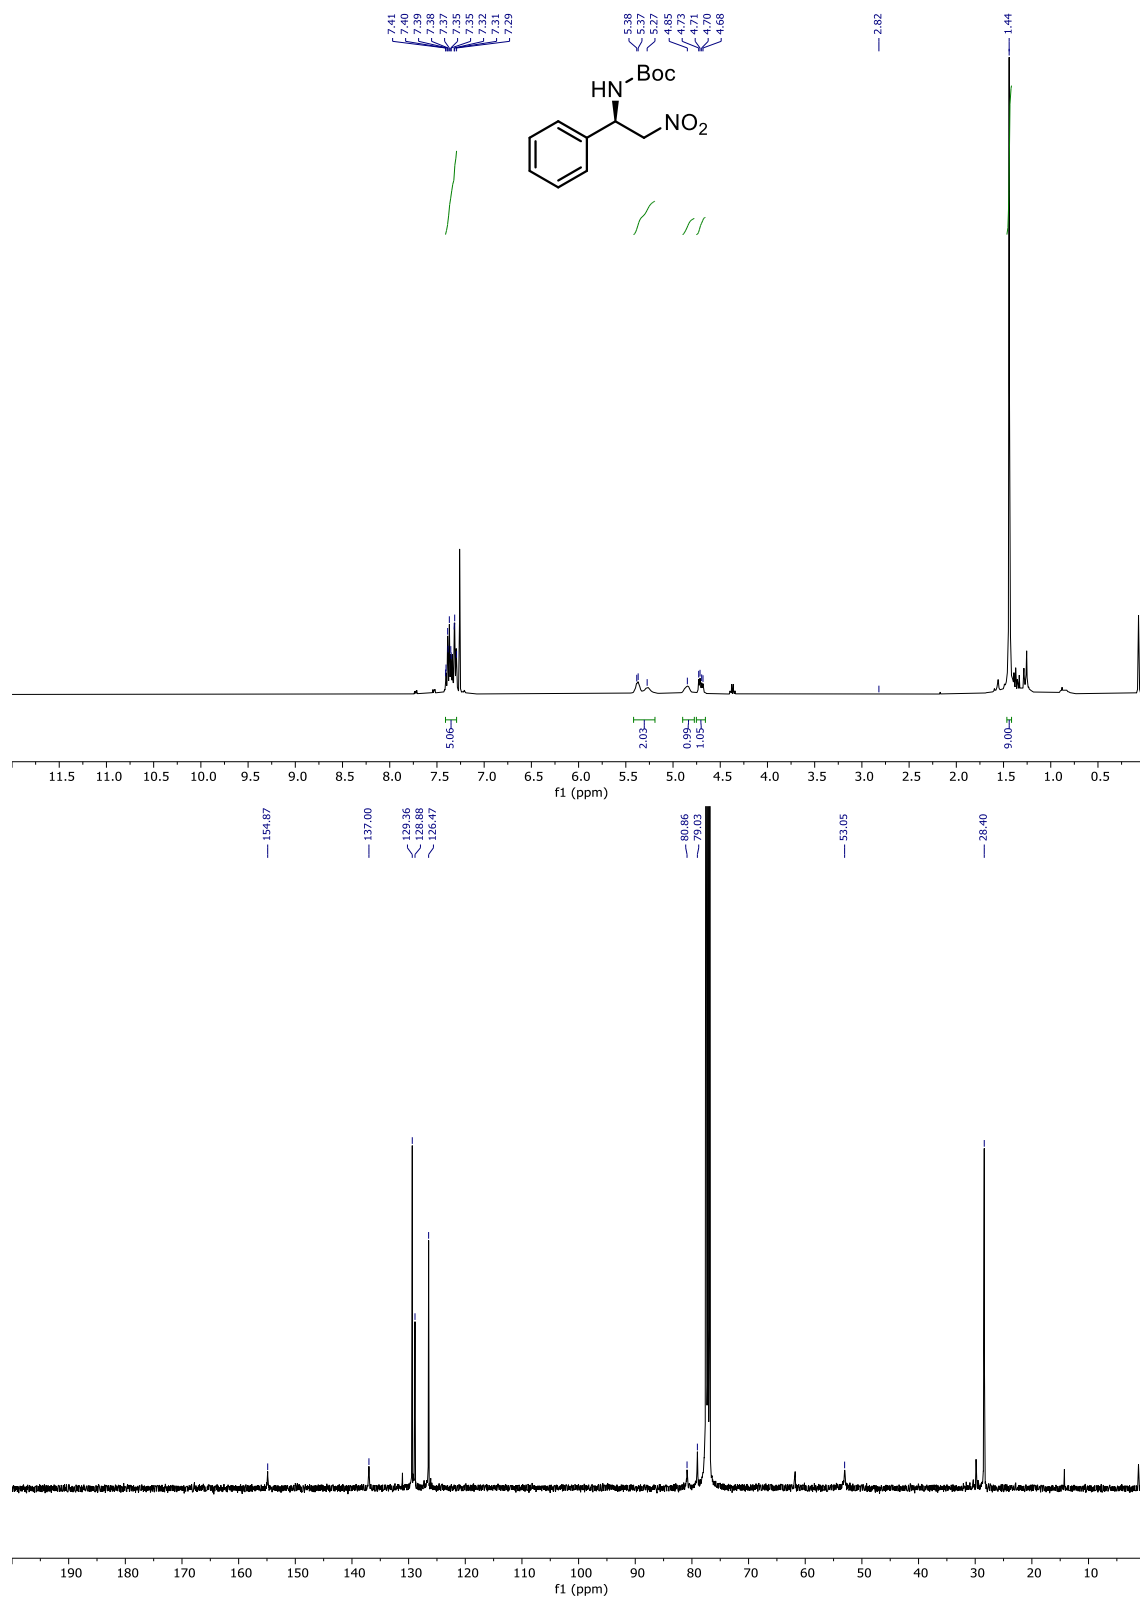



Tert-butyl (*R*)-(1-(4-chlorophenyl)-2-nitroethyl)carbamate (**4b**) (CDCl<sub>3</sub>, <sup>1</sup>H 400 MHz, <sup>13</sup>C 101 MHz)

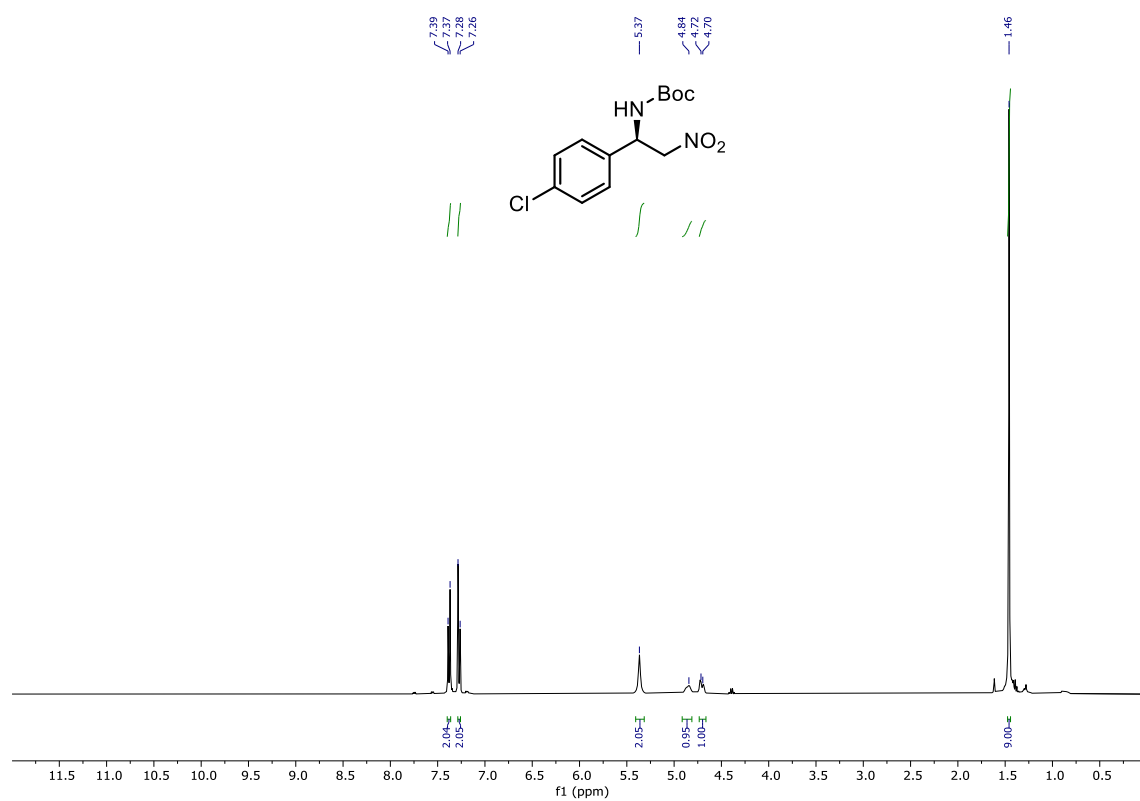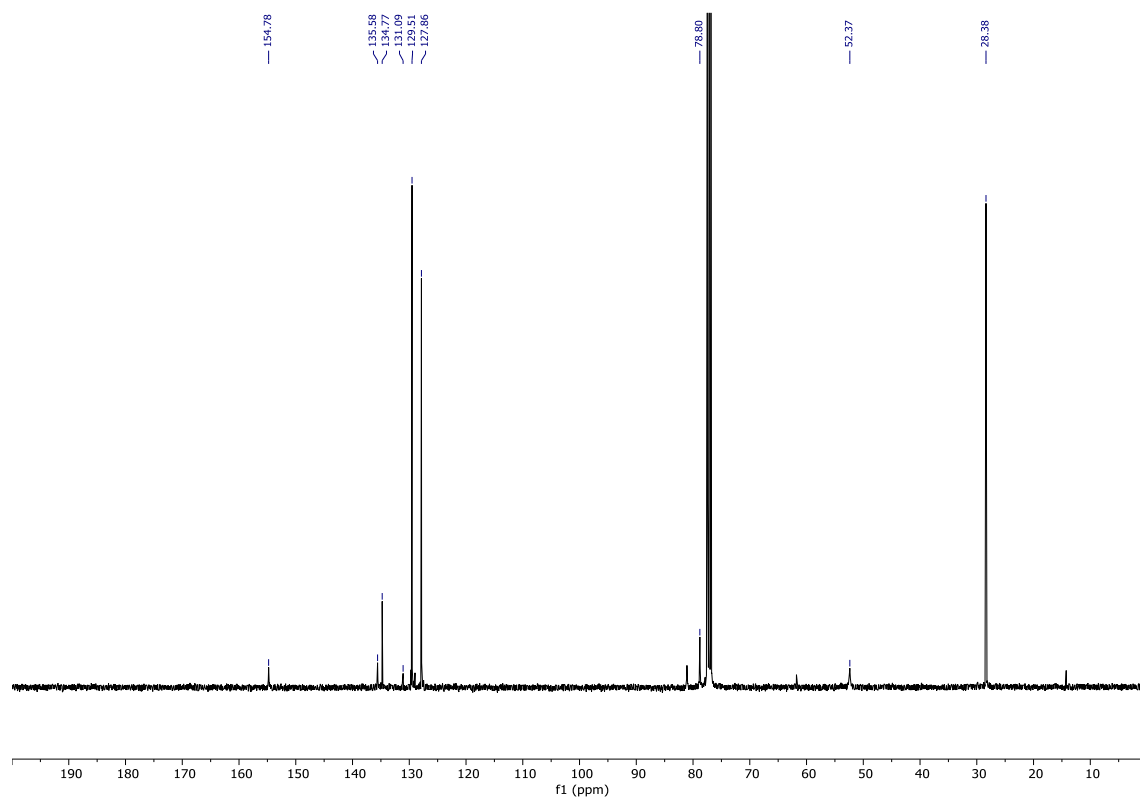

Tert-butyl (*R*)-(1-(3-chlorophenyl)-2-nitroethyl)carbamate (**4c**) (CDCl<sub>3</sub>, <sup>1</sup>H 400 MHz, <sup>13</sup>C 101 MHz)

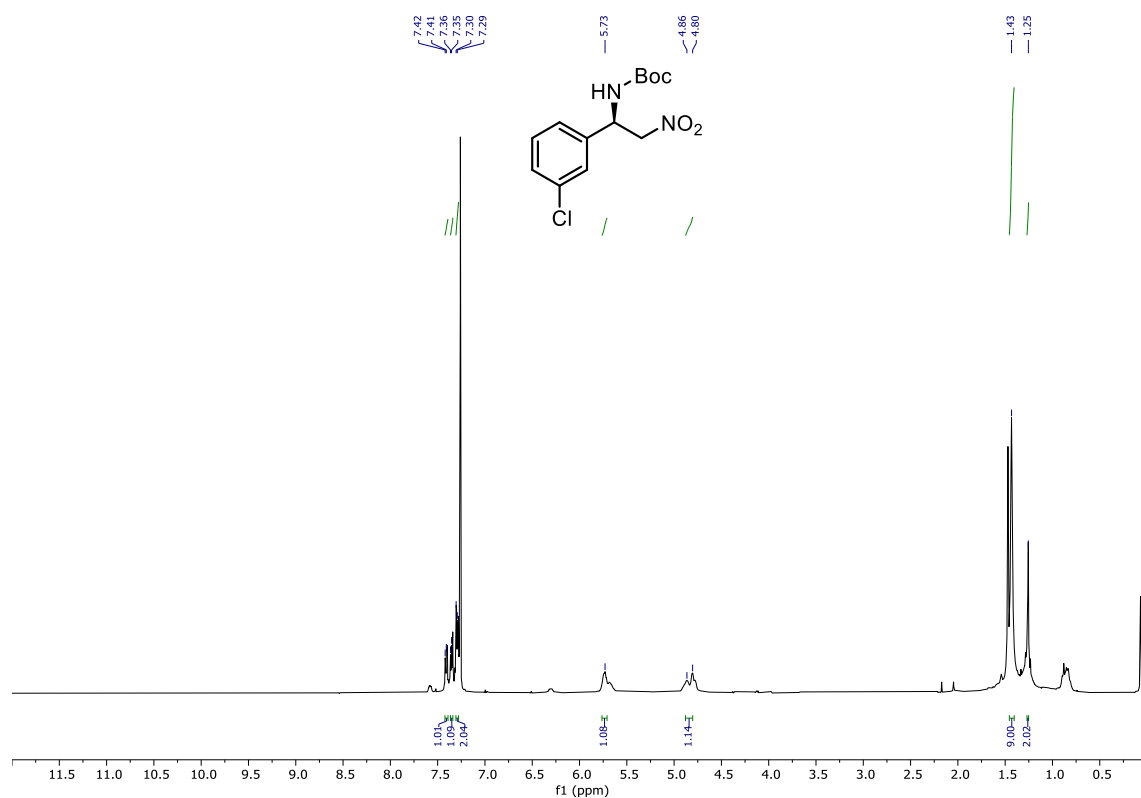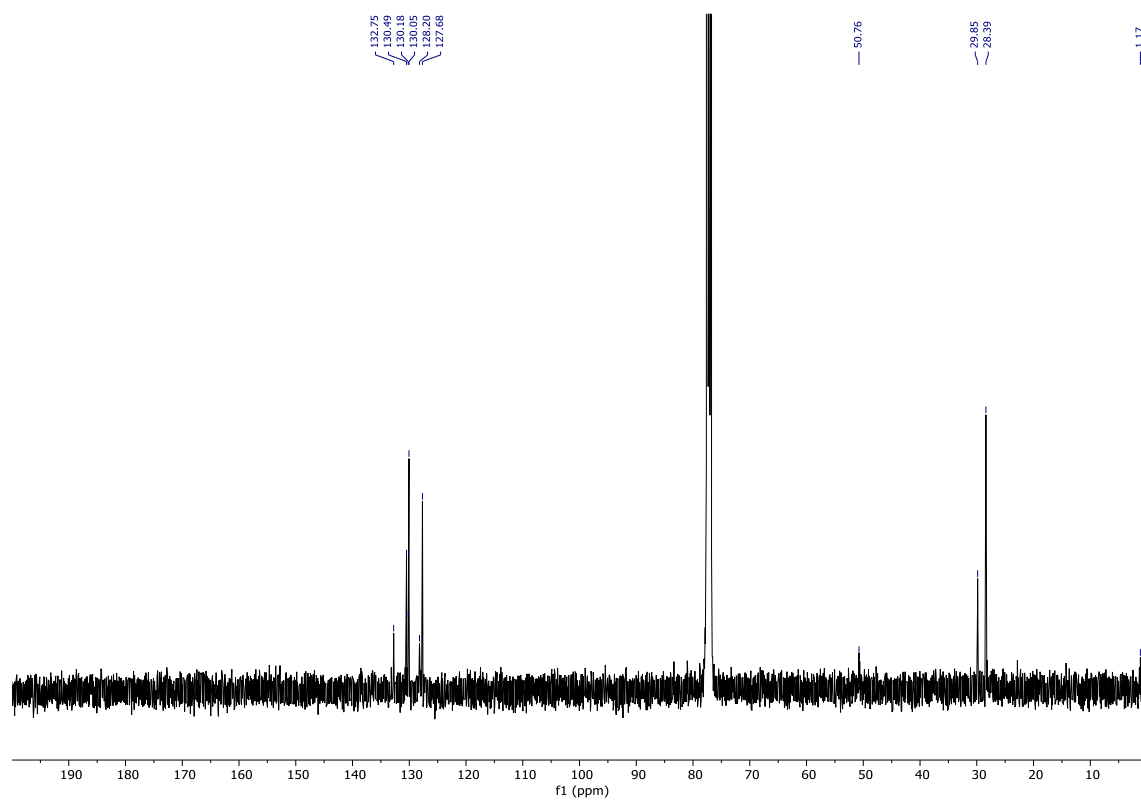

**Tert-butyl (*R*)-(1-(2-chlorophenyl)-2-nitroethyl)carbamate (4d) (CDCl<sub>3</sub>, <sup>1</sup>H 400 MHz, <sup>13</sup>C 101 MHz)**

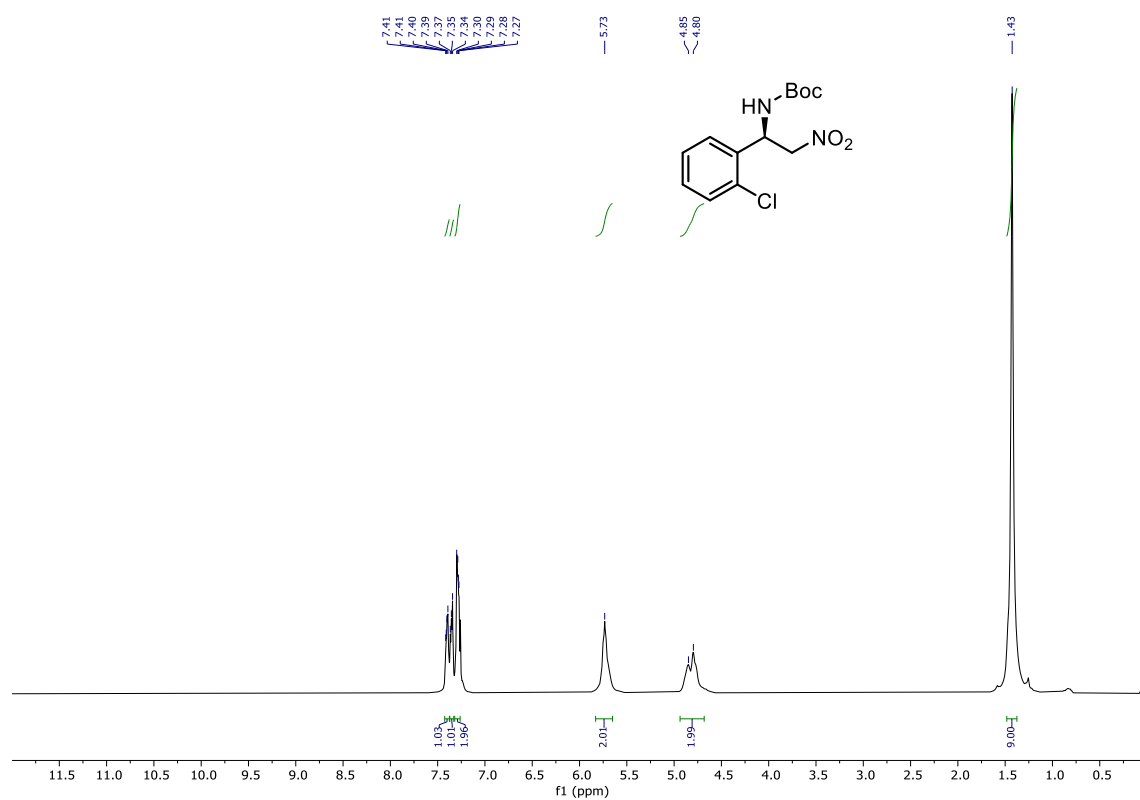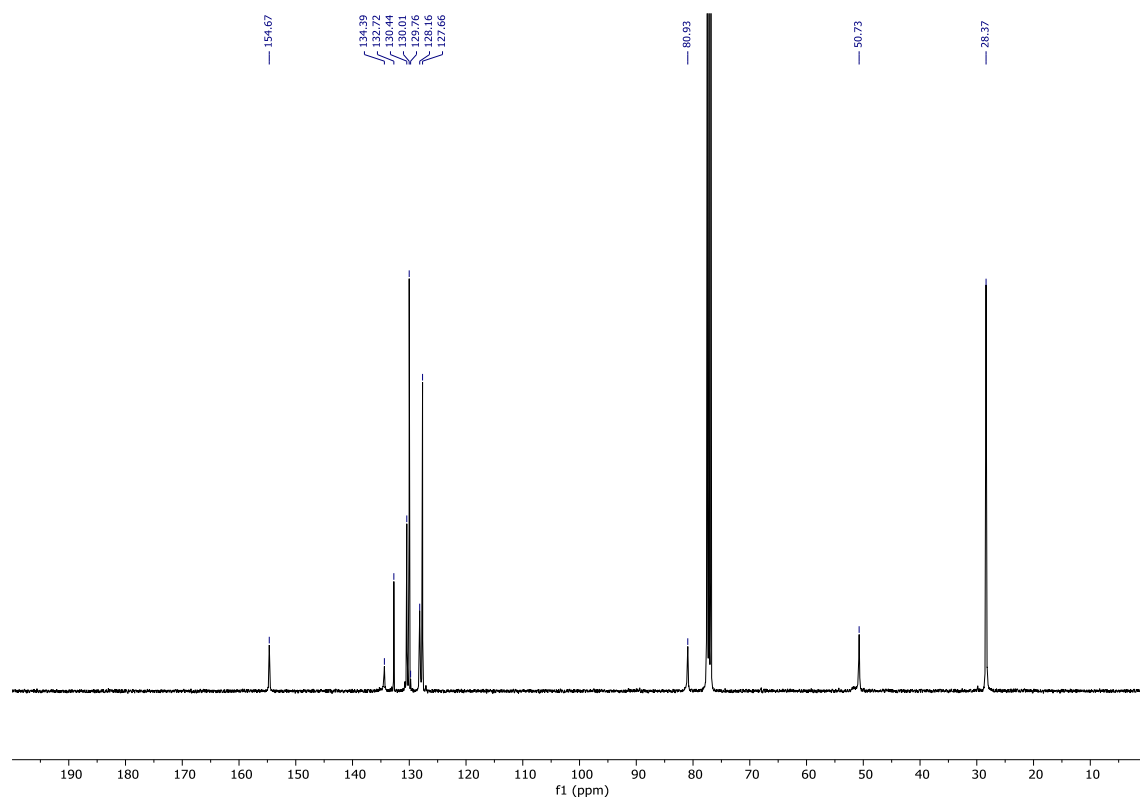

**Tert-butyl (*R*)-(1-(naphthalen-1-yl)-2-nitroethyl)carbamate (4e) (CDCl<sub>3</sub>, <sup>1</sup>H 400 MHz, <sup>13</sup>C 101 MHz)**

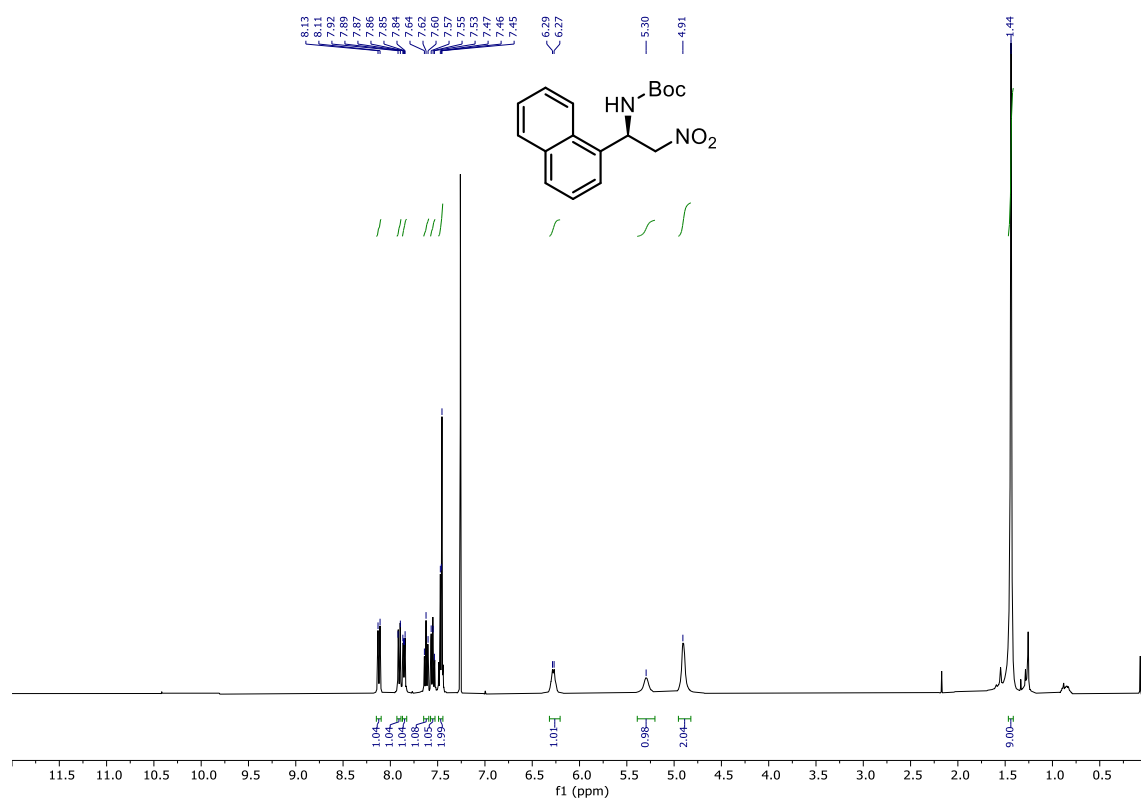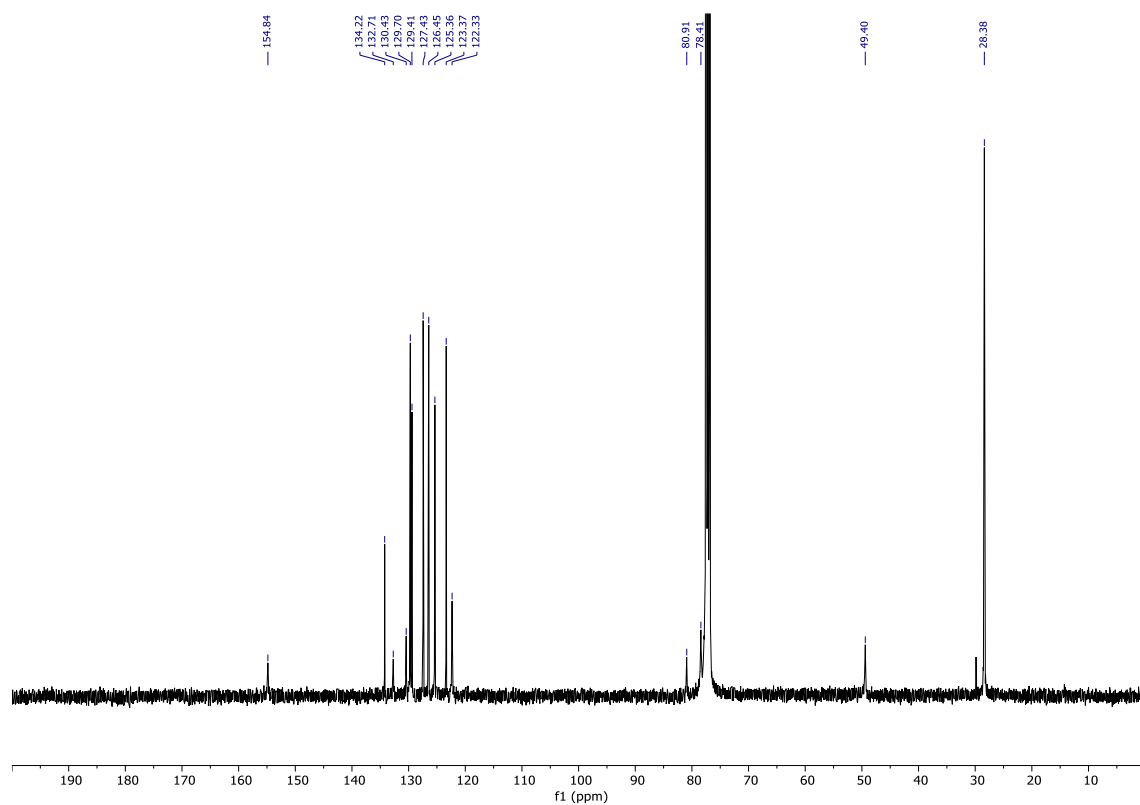

**Tert-butyl (*R*)-(1-(naphthalen-2-yl)-2-nitroethyl)carbamate (4f) (CDCl<sub>3</sub>, <sup>1</sup>H 400 MHz, <sup>13</sup>C 101 MHz)**

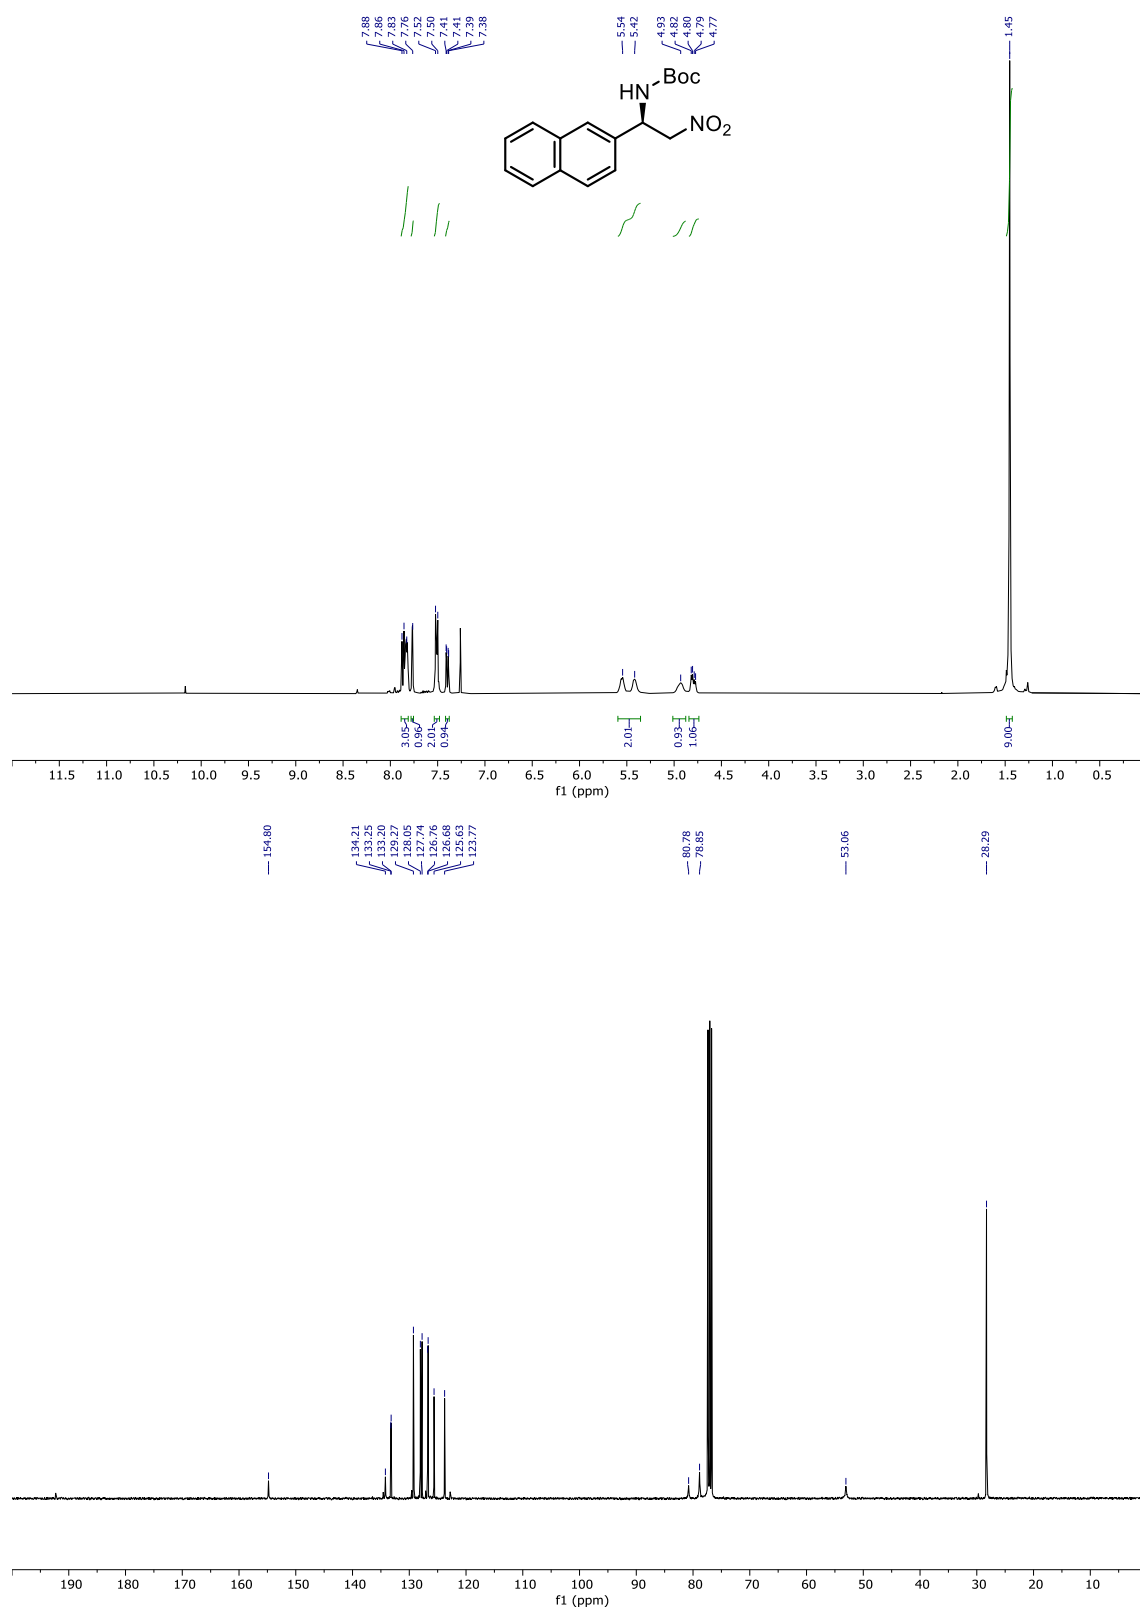

**Tert-butyl (*R*)-(2-nitro-1-(pyridin-3-yl)ethyl)carbamate (4g) (CDCl<sub>3</sub>, <sup>1</sup>H 400 MHz, <sup>13</sup>C 101 MHz)**

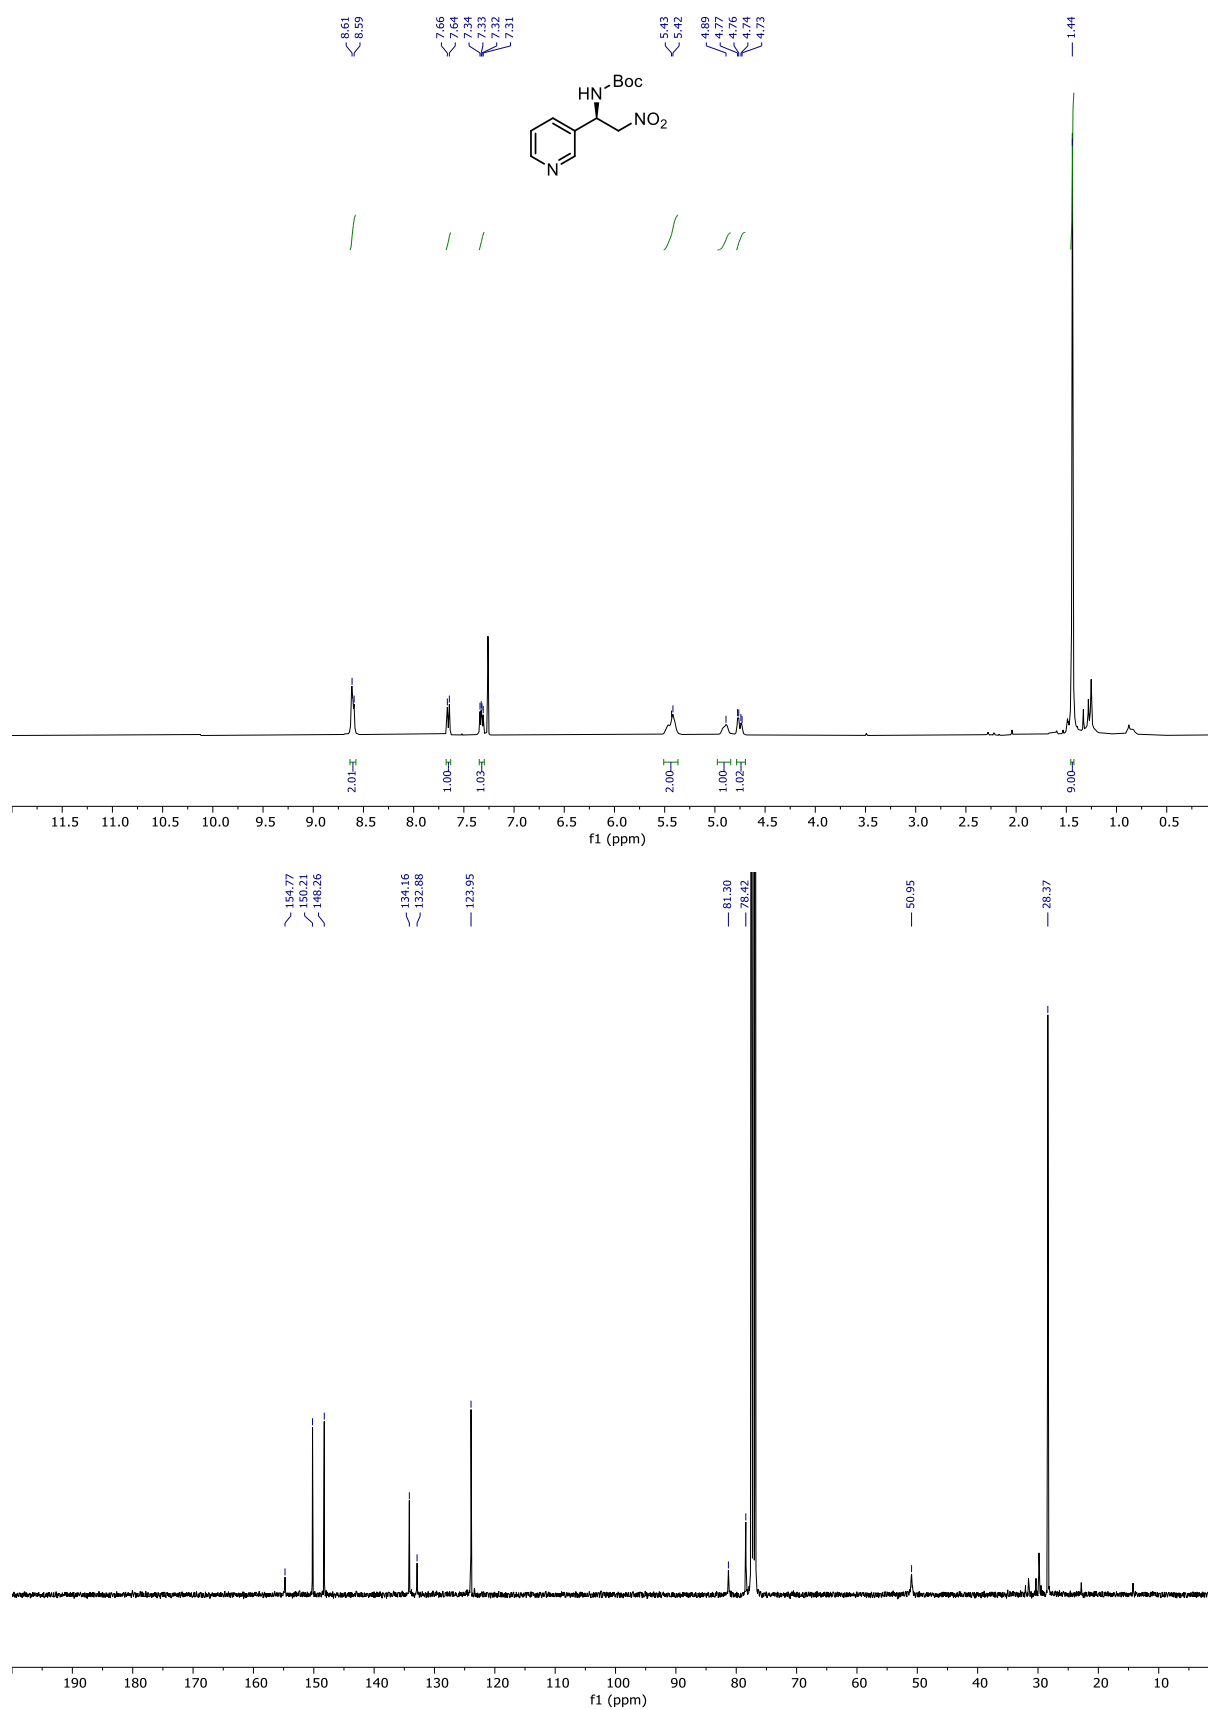

Tert-butyl (*R*)-(2-nitro-1-(thiophen-2-yl)ethyl)carbamate (**4h**) (CDCl<sub>3</sub>, <sup>1</sup>H 400 MHz, <sup>13</sup>C 101 MHz)

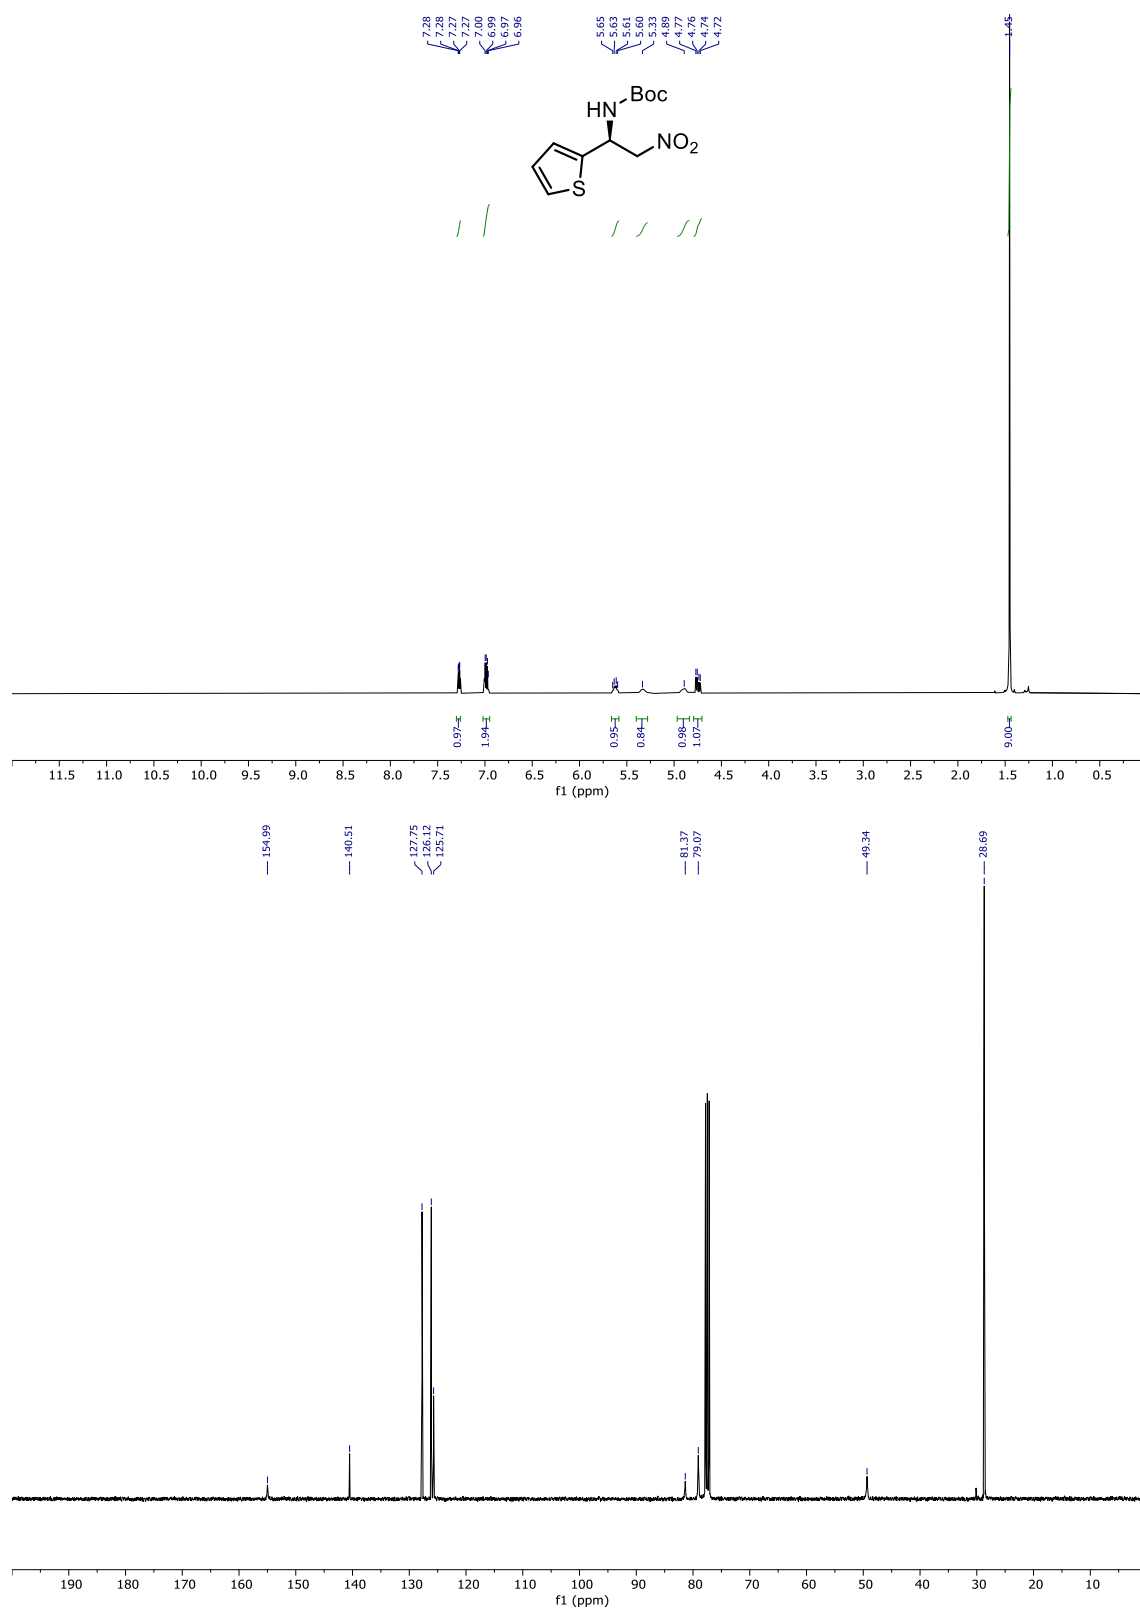

**Tert-butyl (*R*)-(1-(2-bromophenyl)-2-nitroethyl)carbamate (4i) (CDCl<sub>3</sub>, <sup>1</sup>H 400 MHz, <sup>13</sup>C 101 MHz)**

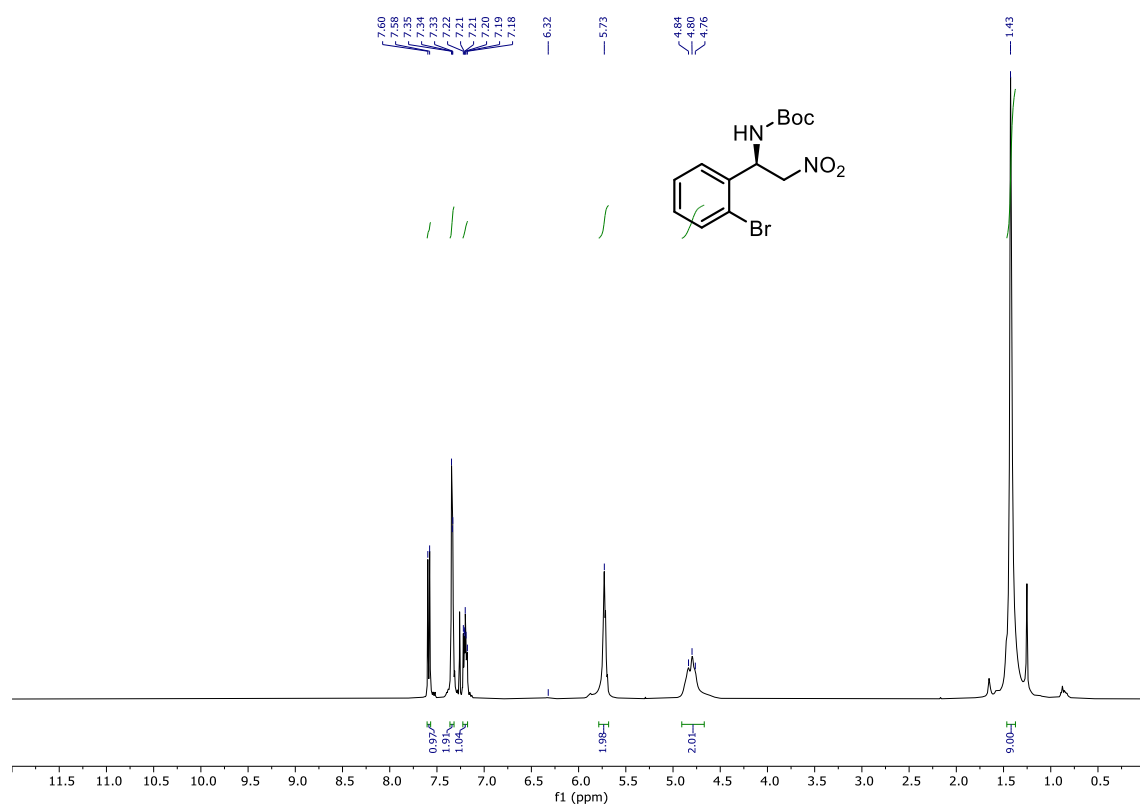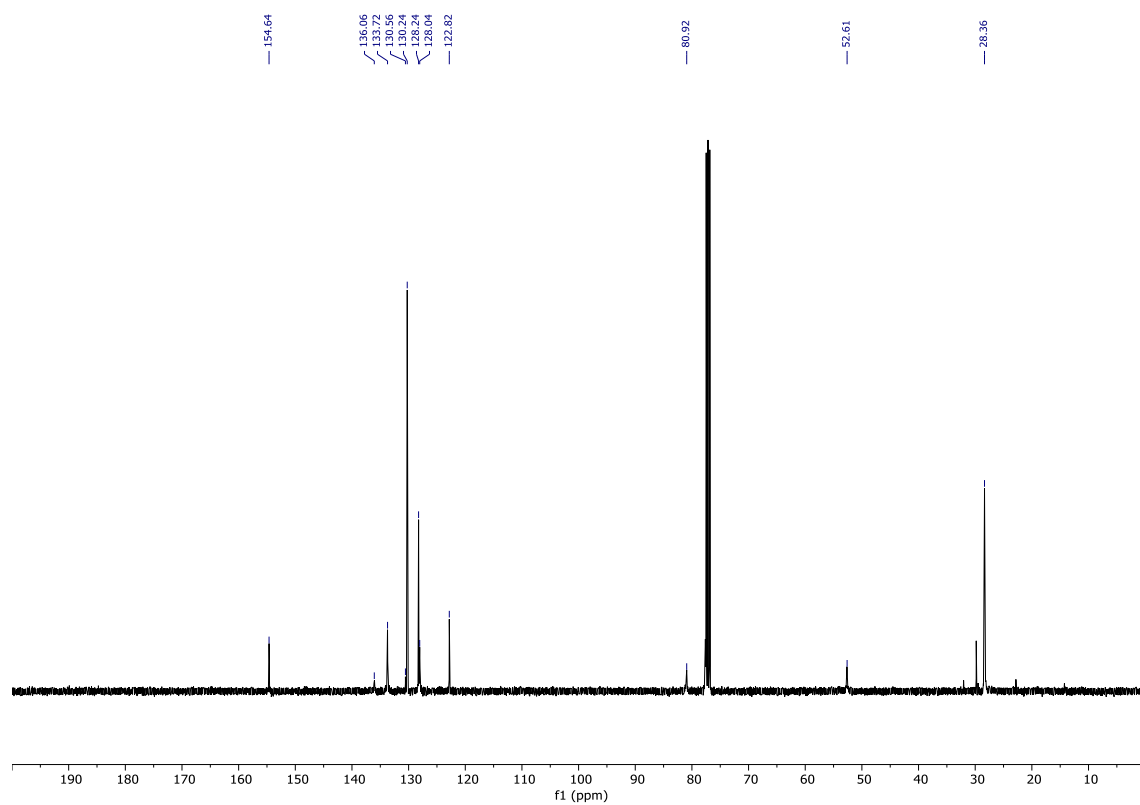



**Tert-butyl (*R*)-(1-(2-bromophenyl)-2-nitroethyl)carbamate (4j) (Acetone-d<sub>6</sub>, <sup>1</sup>H 400 MHz, <sup>13</sup>C 101 MHz)**

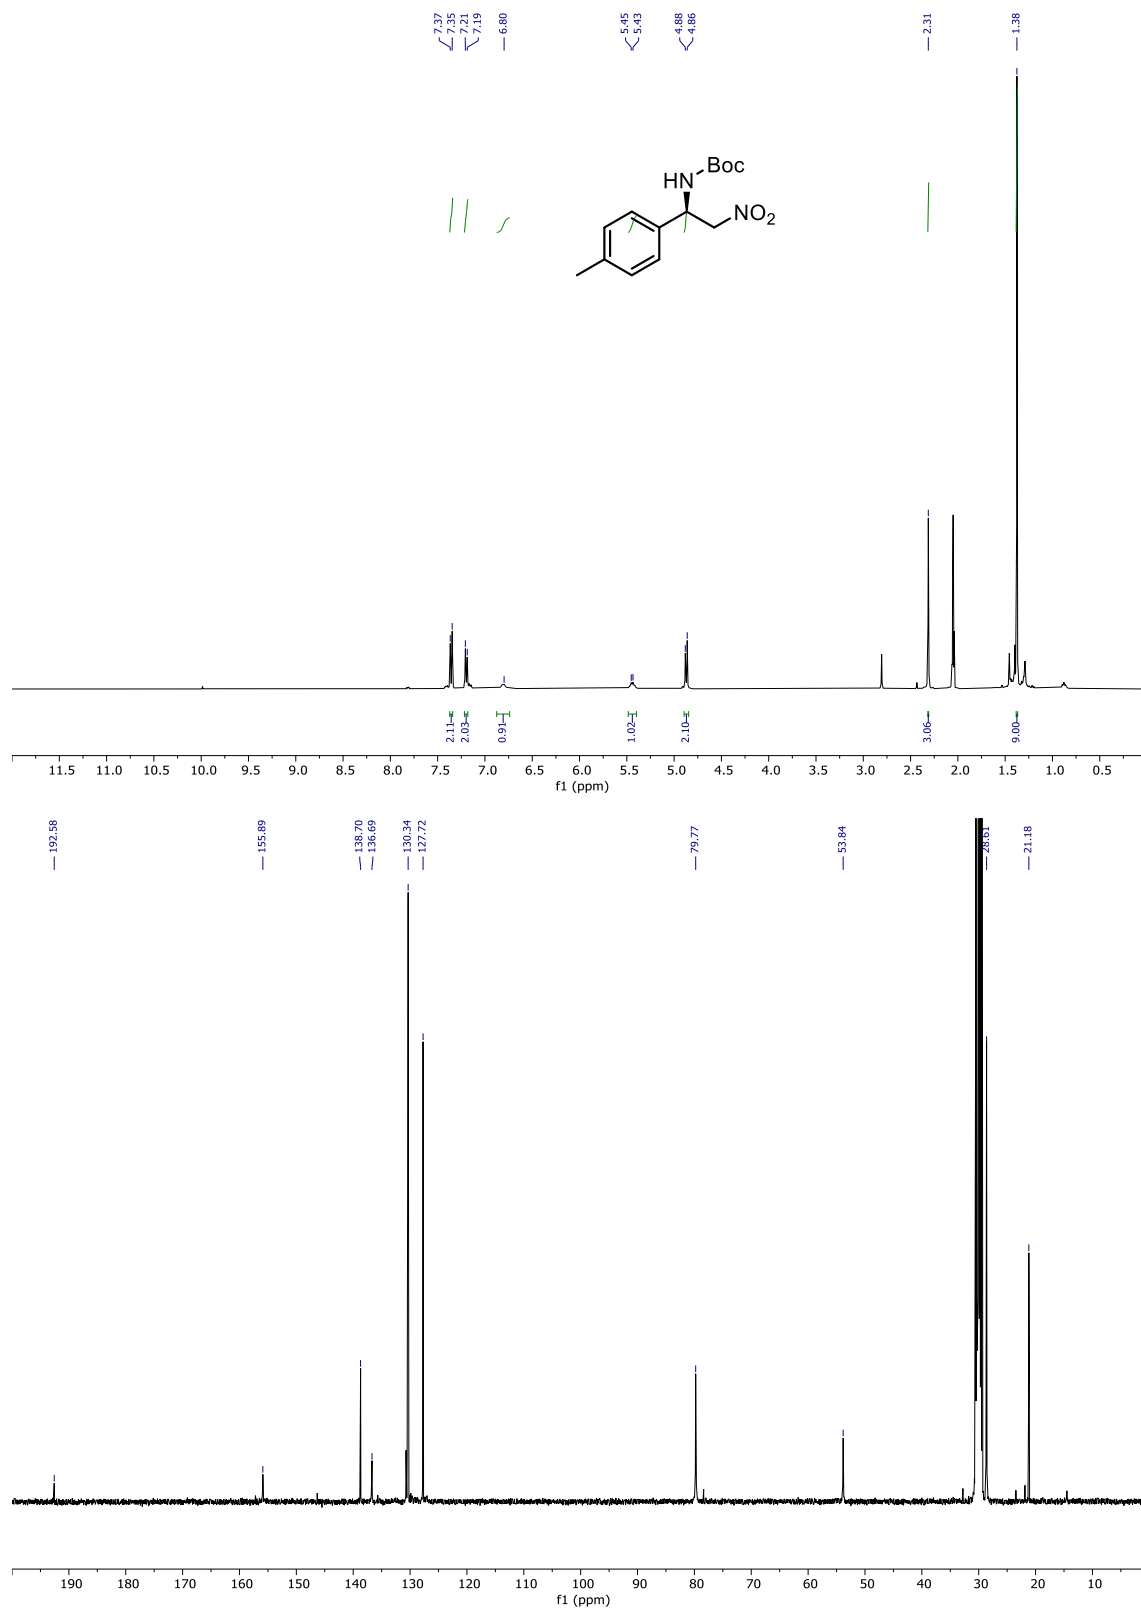

Tert-butyl (*R*)-(2-nitro-1-(4-(trifluoromethyl)phenyl)ethyl)carbamate (**4k**) (CDCl<sub>3</sub>, <sup>1</sup>H 400 MHz, <sup>13</sup>C 101 MHz, <sup>19</sup>F 376 MHz)

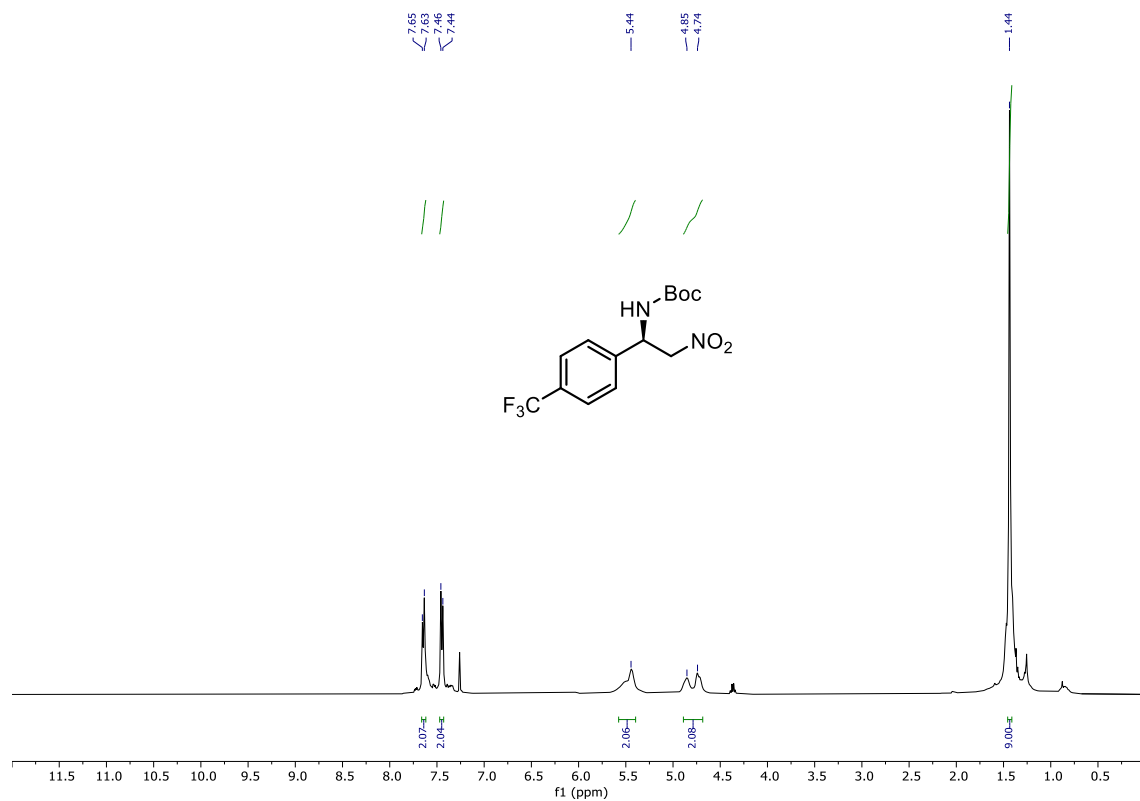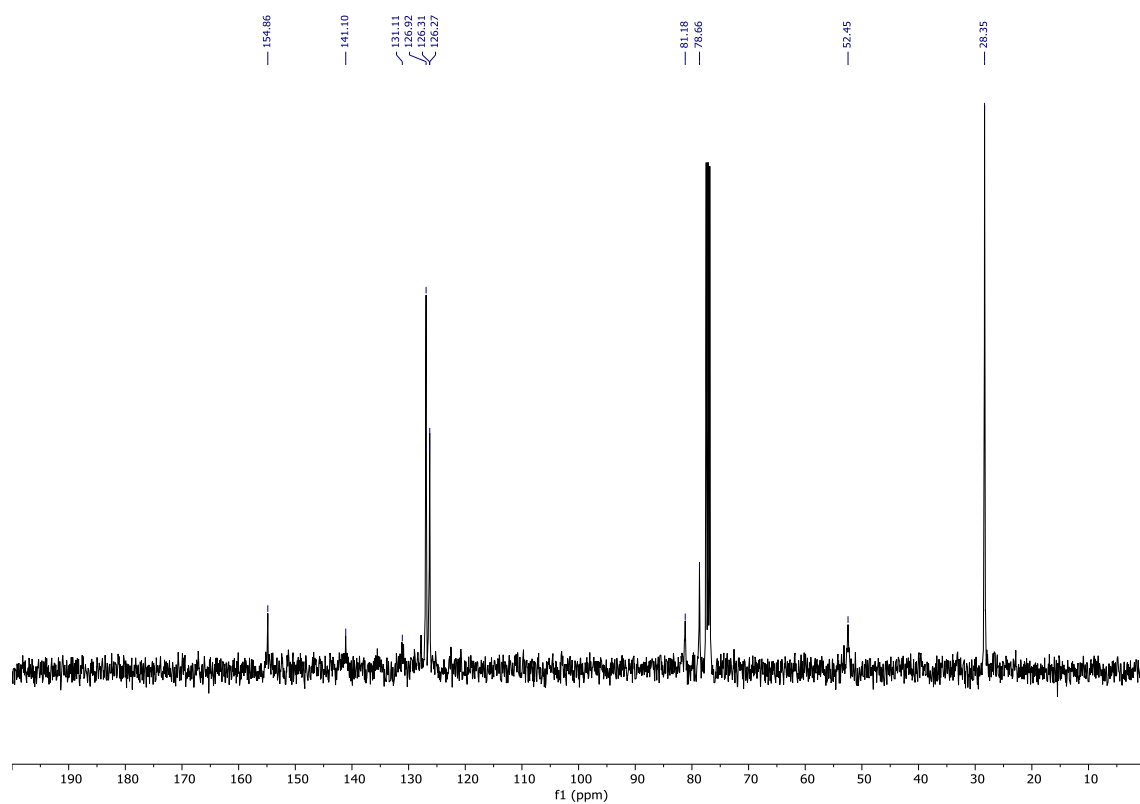

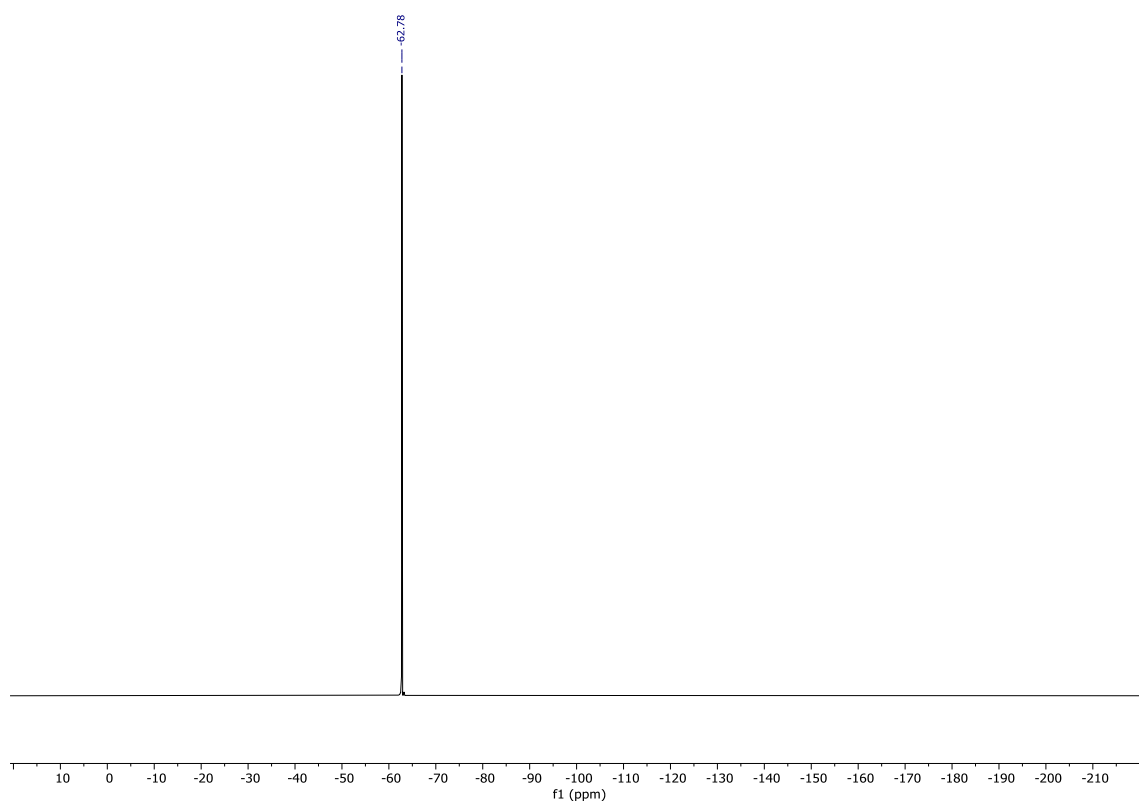

Tert-butyl (*R*)-(1-(furan-2-yl)-2-nitroethyl)carbamate (**4l**) (CDCl<sub>3</sub>, <sup>1</sup>H 400 MHz, <sup>13</sup>C 101 MHz)

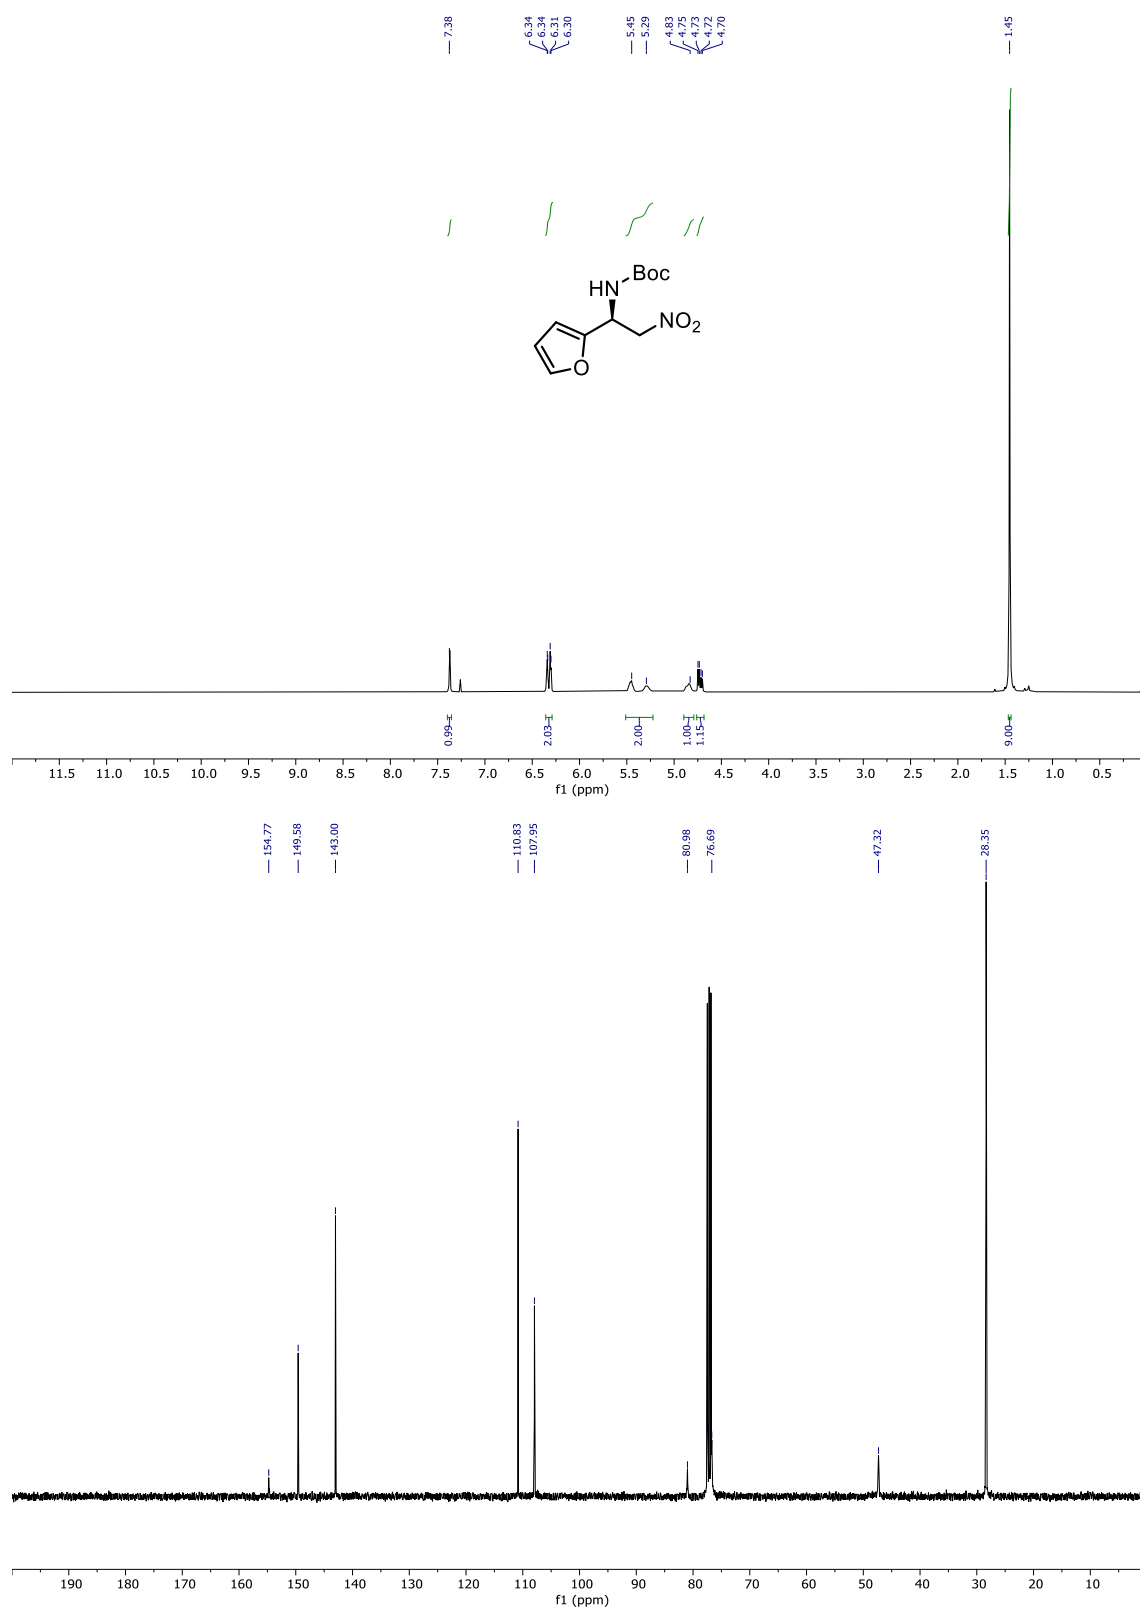

# NMR spectra of 6

(S)-dimethyl 2-(2-nitro-1-phenylethyl)malonate (6a) (CDCl<sub>3</sub>, <sup>1</sup>H 400 MHz, <sup>13</sup>C 101 MHz)

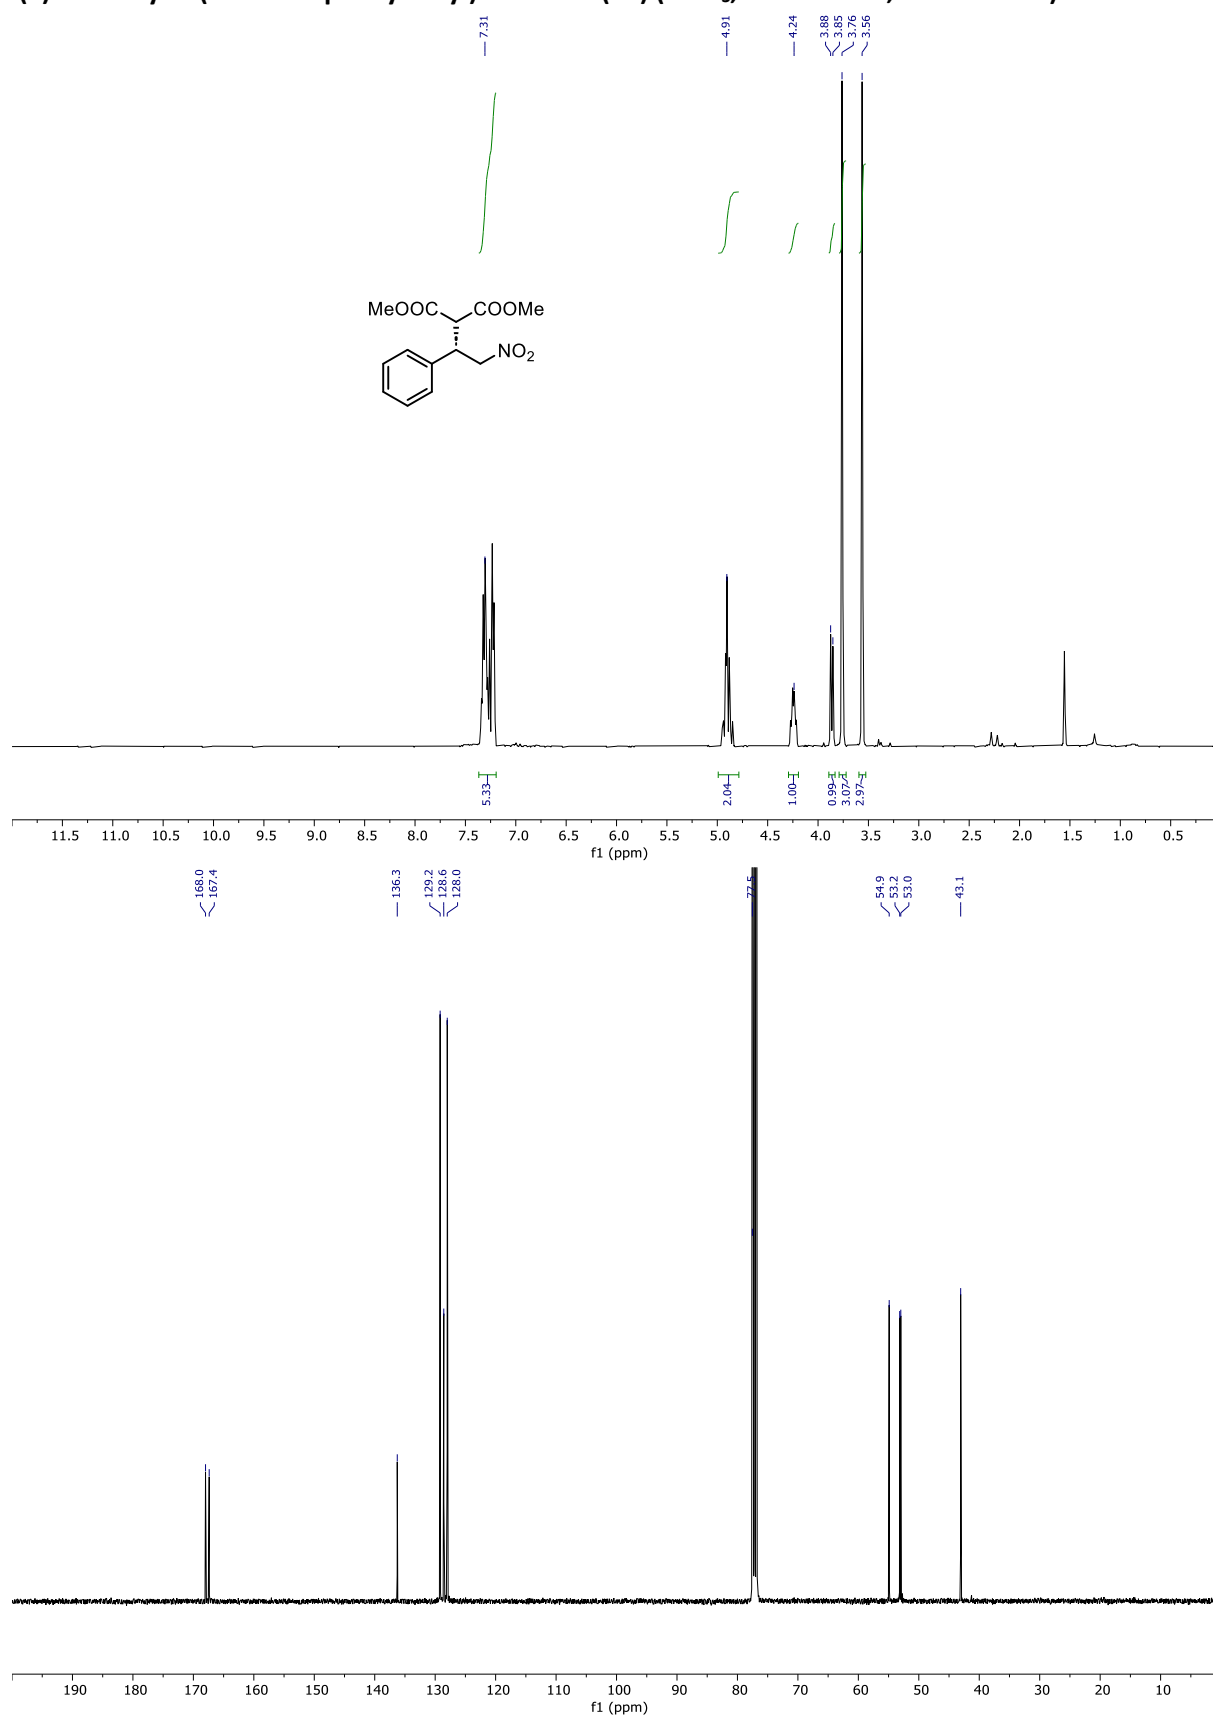

**(S)-dimethyl 2-(1-(4-fluorophenyl)-2-nitroethyl)malonate (6b) (CDCl<sub>3</sub>, <sup>1</sup>H 400 MHz, <sup>13</sup>C 101 MHz, <sup>19</sup>F 376 MHz)**

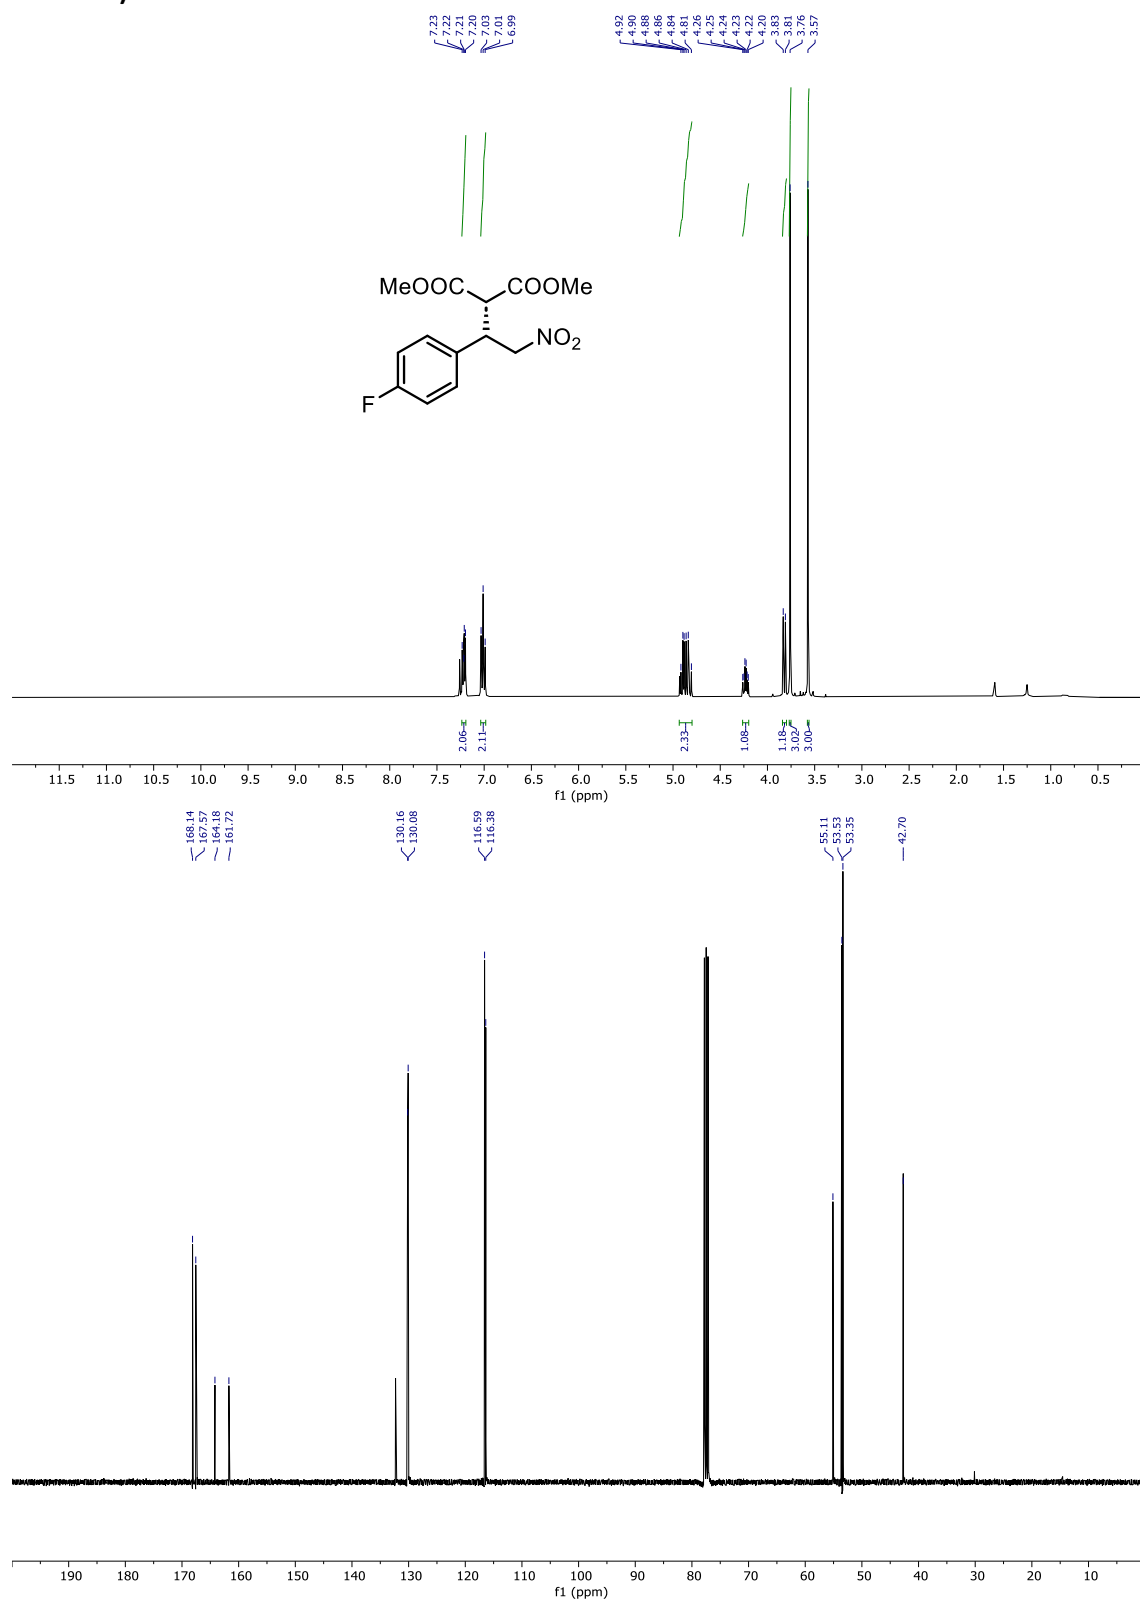

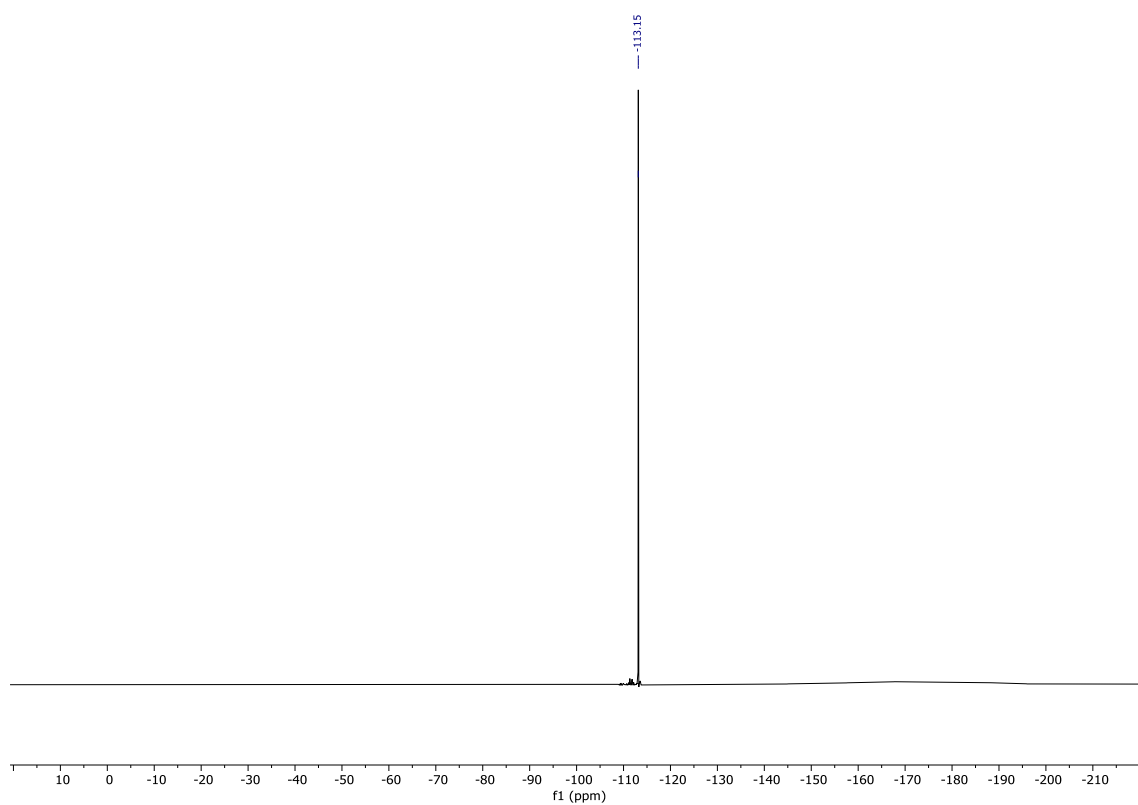

**(S)-dimethyl 2-(1-(4-chlorophenyl)-2-nitroethyl)malonate (6c) (CDCl<sub>3</sub>, <sup>1</sup>H 400 MHz, <sup>13</sup>C 101 MHz)**

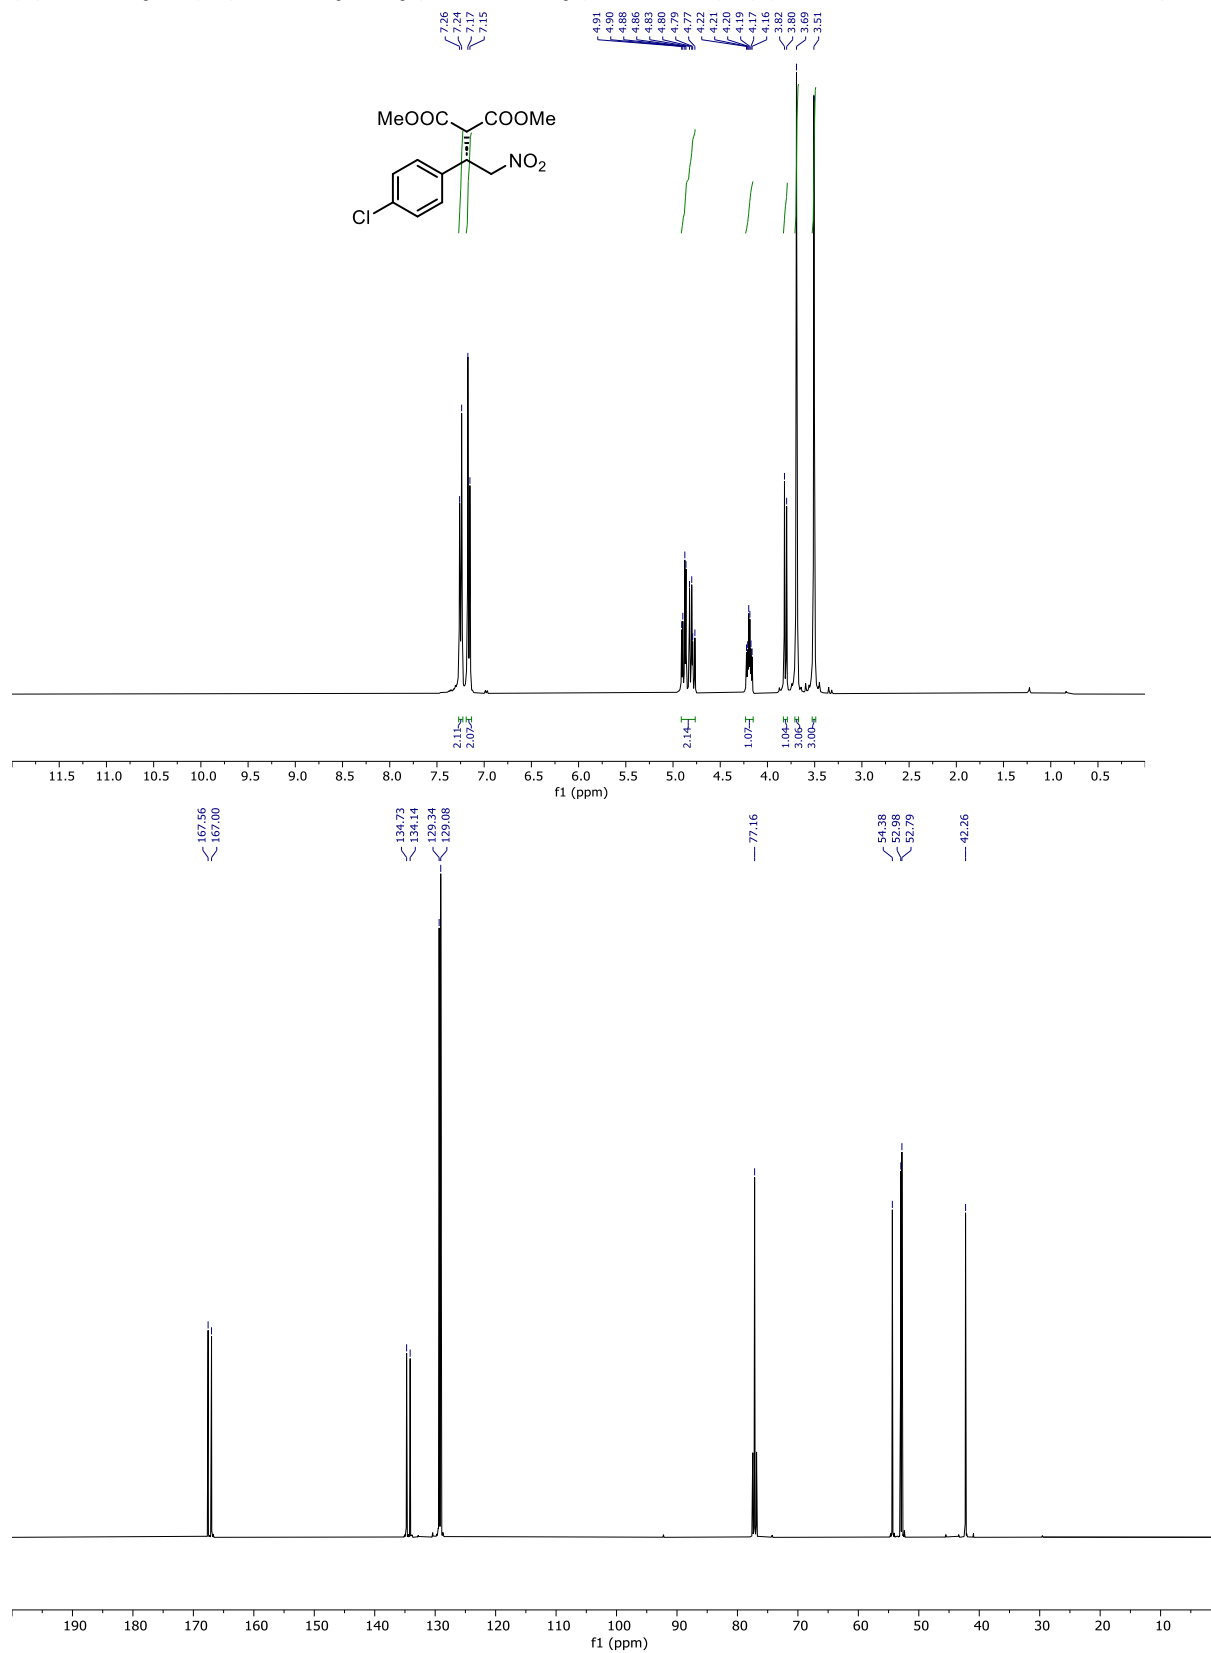



**(S)-dimethyl 2-(1-(4-bromophenyl)-2-nitroethyl)malonate (6d) (CDCl<sub>3</sub>, <sup>1</sup>H 400 MHz, <sup>13</sup>C 101 MHz)**

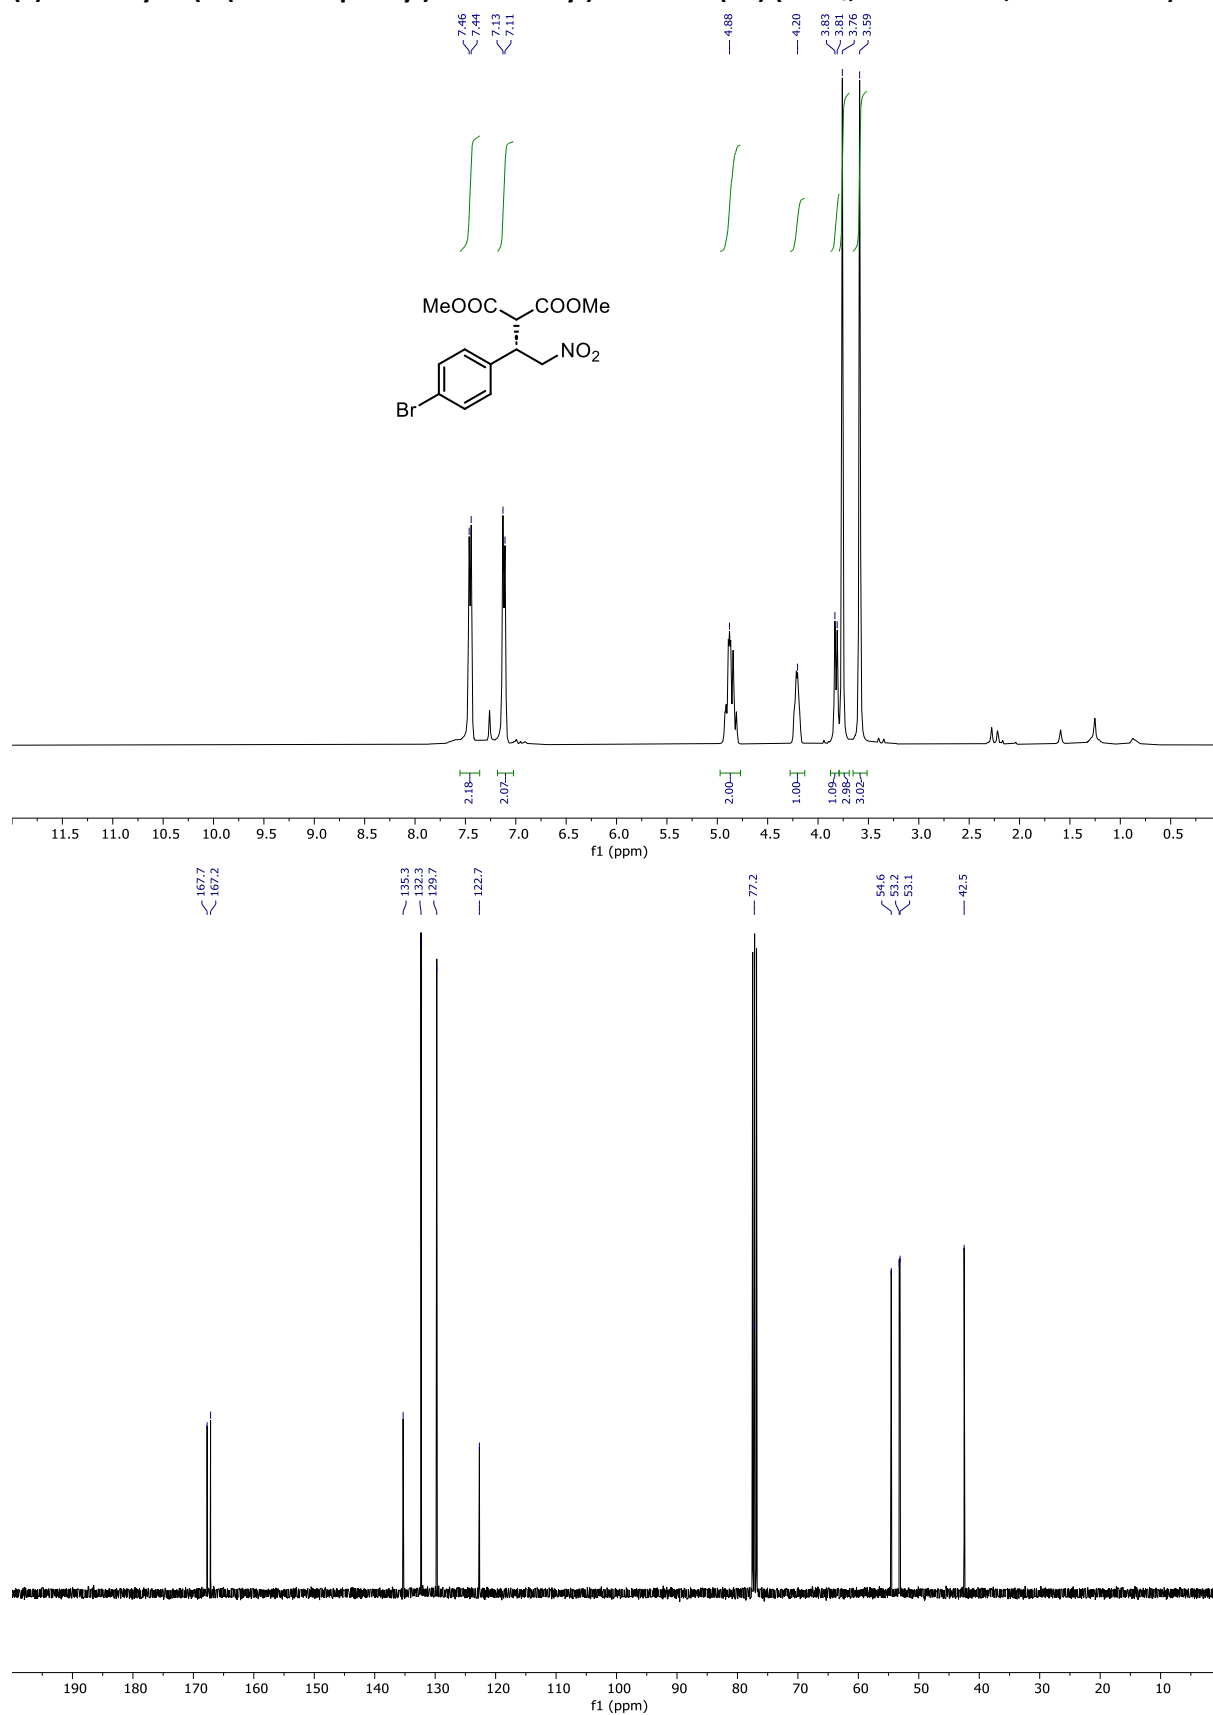

**(S)-dimethyl 2-(1-(4-cyanophenyl)-2-nitroethyl)malonate (6e) (CDCl<sub>3</sub>, <sup>1</sup>H 400 MHz, <sup>13</sup>C 101 MHz)**

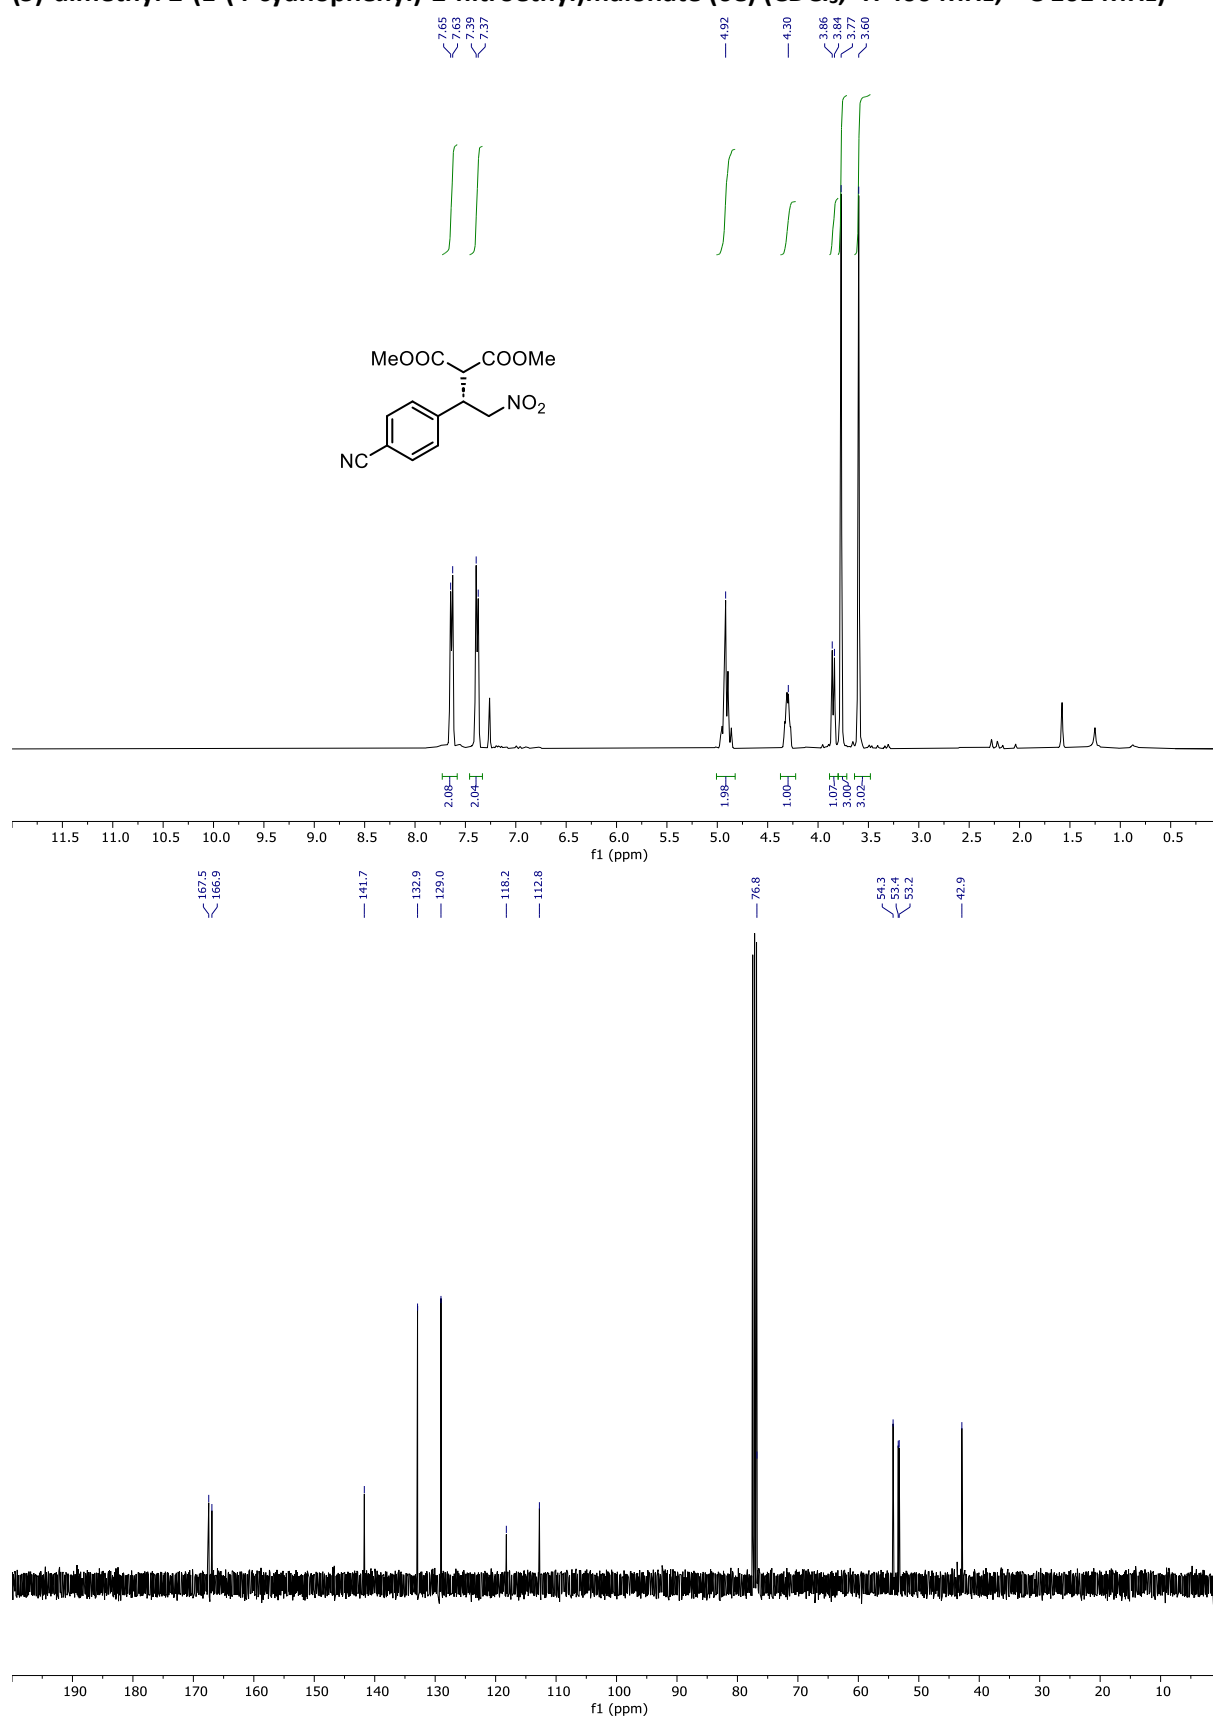

**(S)-dimethyl 2-(2-nitro-1-(p-tolyl)ethyl)malonate (6f) (CDCl<sub>3</sub>, <sup>1</sup>H 400 MHz, <sup>13</sup>C 101 MHz)**

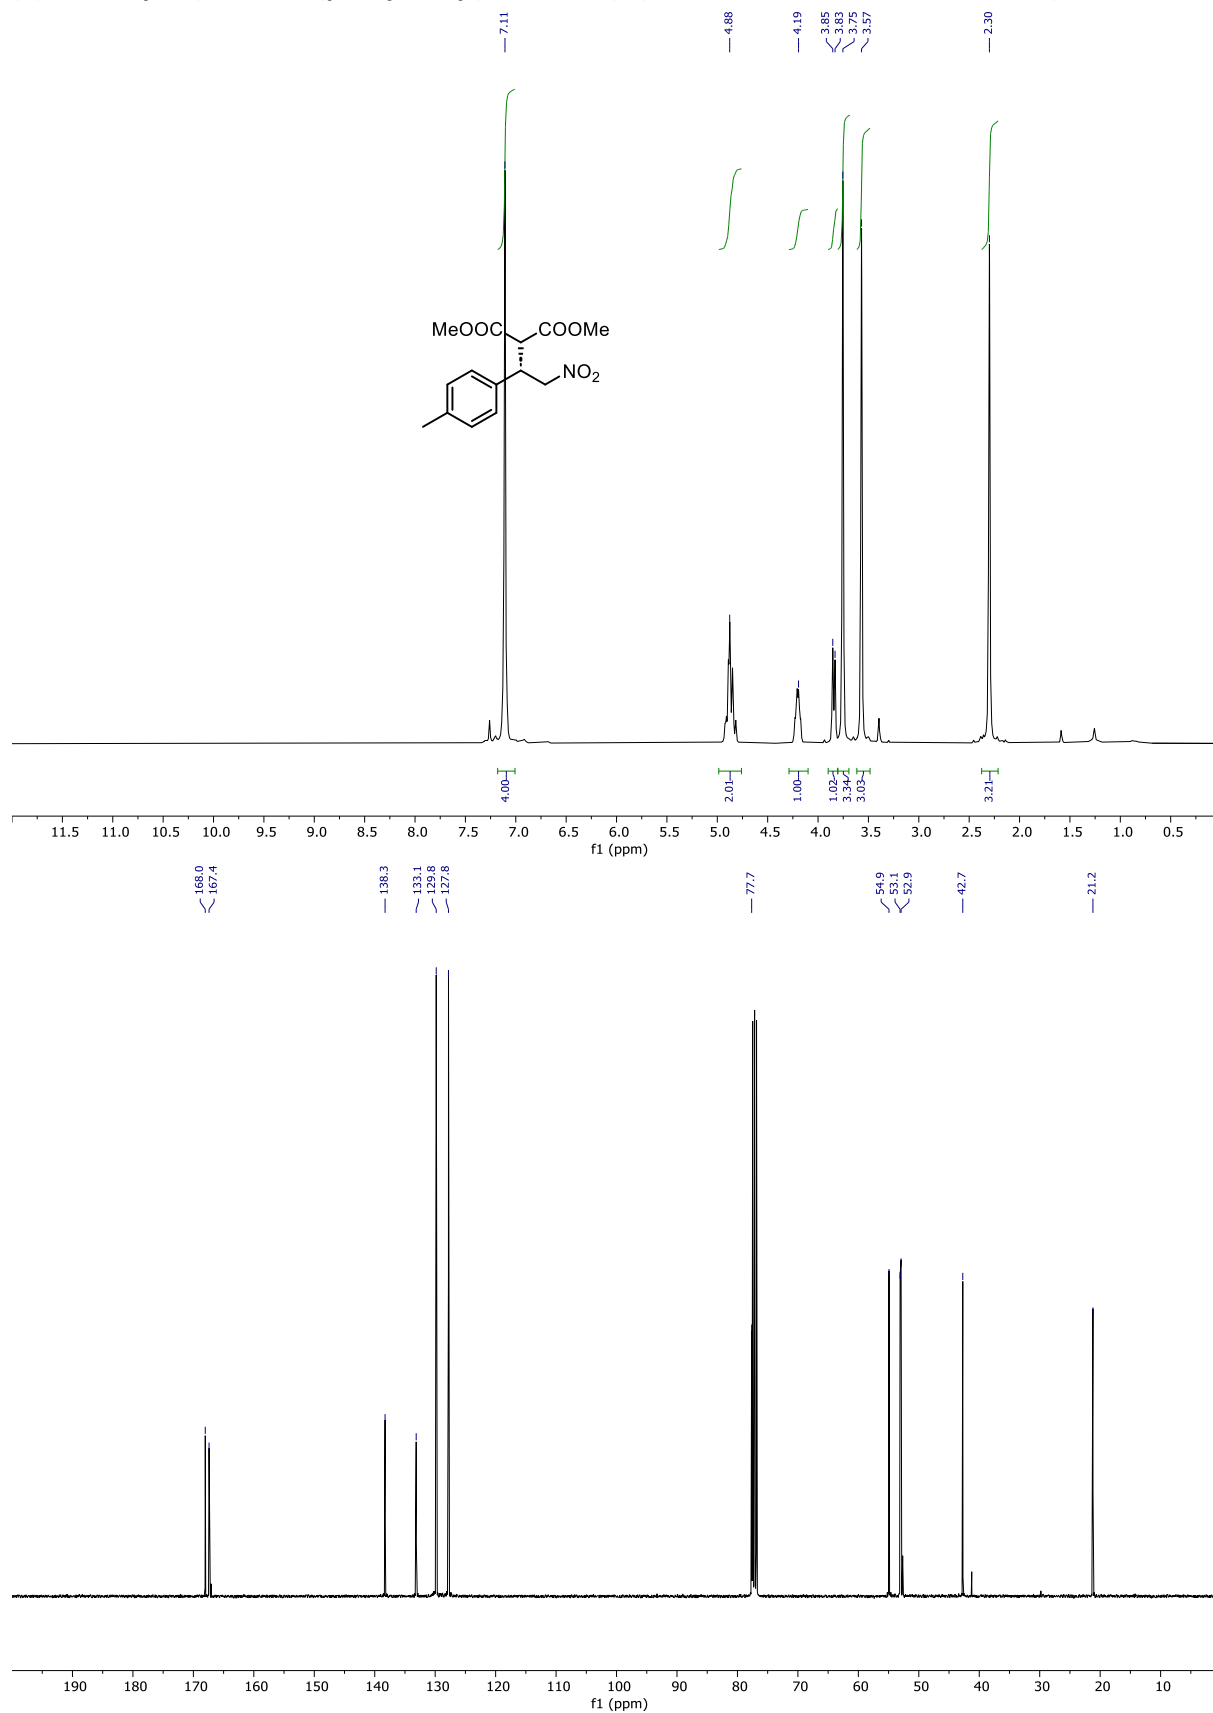

**(S)-dimethyl 2-(1-(4-methoxyphenyl)-2-nitroethyl)malonate (6g) (CDCl<sub>3</sub>, <sup>1</sup>H 400 MHz, <sup>13</sup>C 101 MHz)**

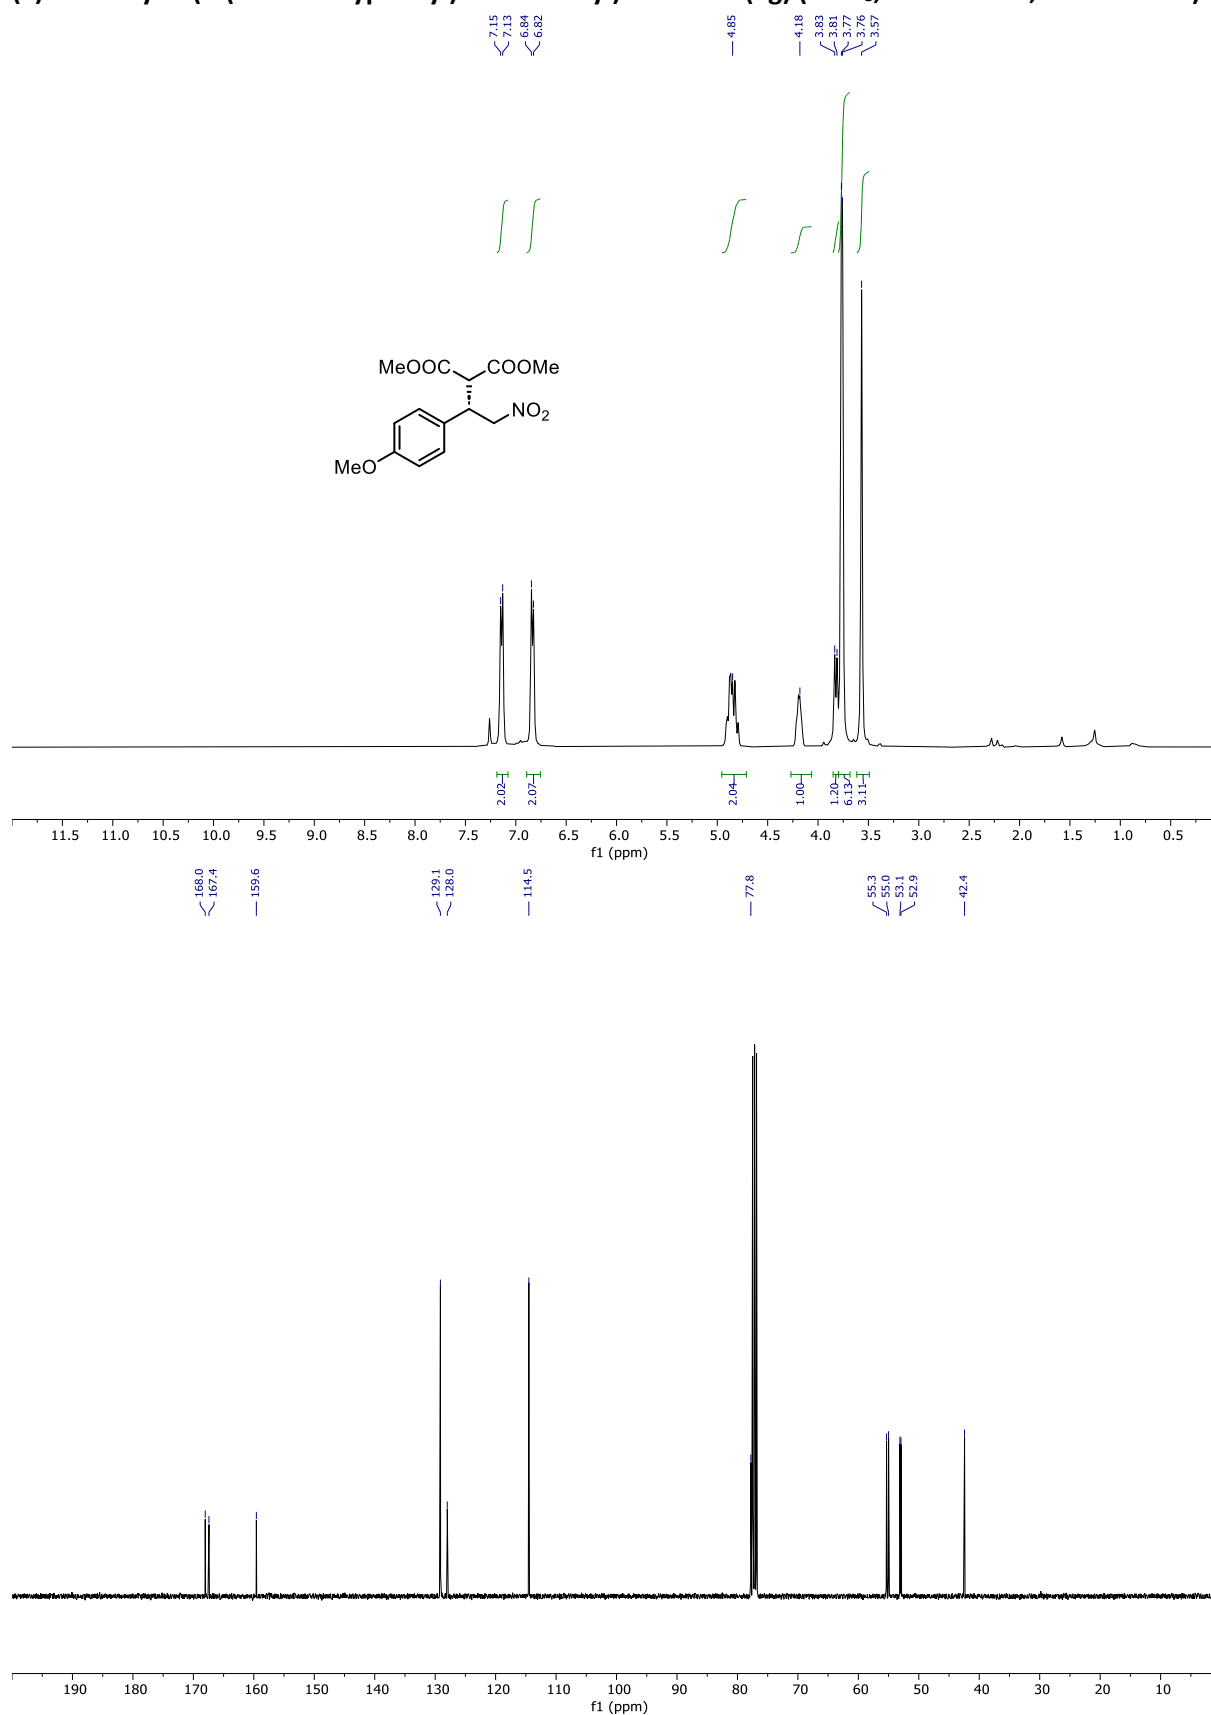

**(S)-dimethyl 2-(1-(4-hydroxyphenyl)-2-nitroethyl)malonate (6h) (CDCl<sub>3</sub>, <sup>1</sup>H 400 MHz, <sup>13</sup>C 101 MHz)**

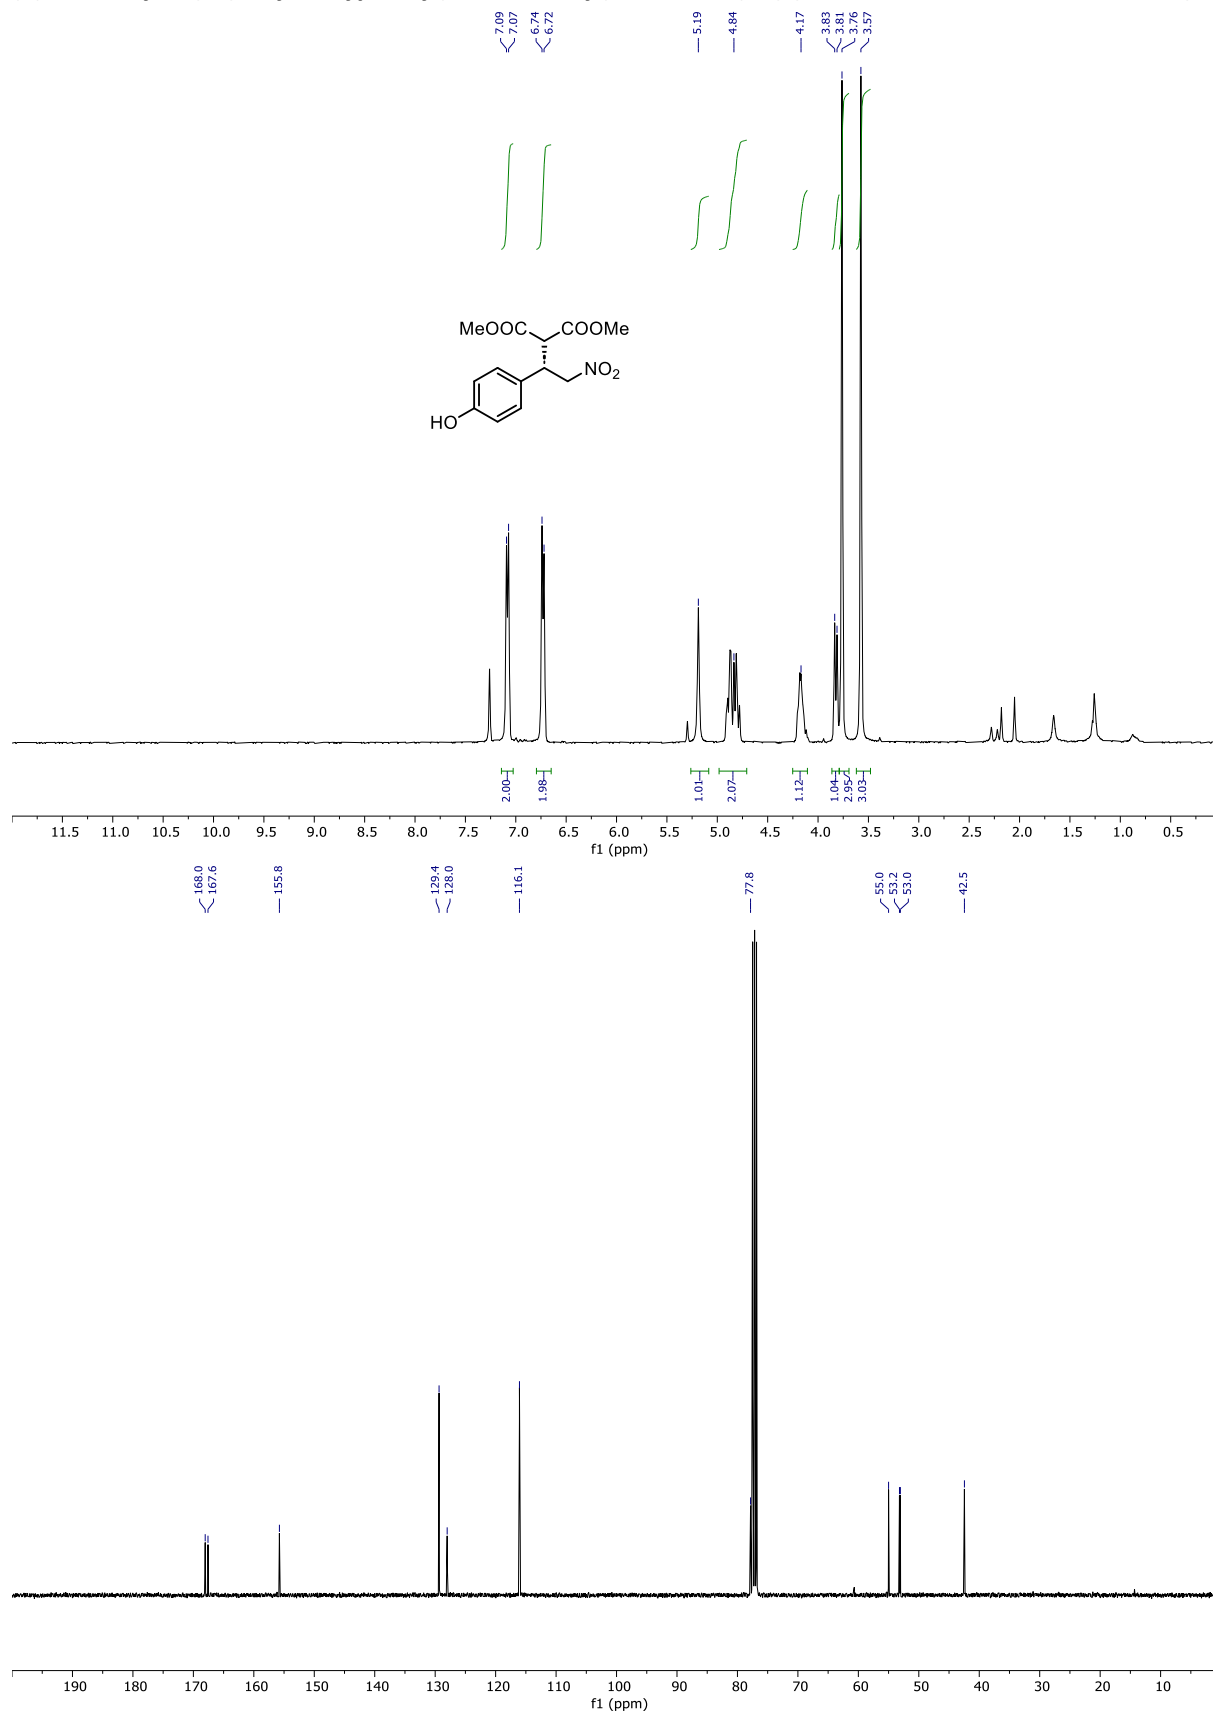

## References

- S1 D. B. G. Williams and M. Lawton, Drying of organic solvents: Quantitative evaluation of the efficiency of several desiccants, *J. Org. Chem.*, 2010, **75**, 8351–8354.
- S2 C. Palomo, M. Oiarbide, A. Laso and R. López, Catalytic enantioselective aza-Henry reaction with broad substrate scope, *J. Am. Chem. Soc.*, 2005, **127**, 17622–17623.
- S3 H. Ishitani, Y. Furiya and S. Kobayashi, Enantioselective Sequential-Flow Synthesis of Baclofen Precursor via Asymmetric 1,4-Addition and Chemoselective Hydrogenation on Platinum/Carbon/Calcium Phosphate Composites, *Chem. Asian J.*, 2020, **15**, 1688–1691.
- S4 S. Del Pozo, S. Vera, M. Oiarbide and C. Palomo, Catalytic Asymmetric Synthesis of Quaternary Barbituric Acids, *J. Am. Chem. Soc.*, 2017, **139**, 15308–15311.
- S5 P. Kasaplar, P. Riente, C. Hartmann and M. A. Pericàs, A polystyrene-supported, highly recyclable squaramide organocatalyst for the enantioselective Michael addition of 1,3-dicarbonyl compounds to  $\beta$ -nitrostyrenes, *Adv. Synth. Catal.*, 2012, **354**, 2905–2910.
- S6 L. Osorio-Planes, C. Rodríguez-Esrich and M. A. Pericàs, Removing the superfluous: A supported squaramide catalyst with a minimalistic linker applied to the enantioselective flow synthesis of pyranonaphthoquinones, *Catal. Sci. Technol.*, 2016, **6**, 4686–4689.
- S7 P. Kasaplar, E. Ozkal, C. Rodríguez-Esrich and M. A. Pericàs, Enantioselective  $\alpha$ -amination of 1,3-dicarbonyl compounds in batch and flow with immobilized thiourea organocatalysts, *Green Chem.*, 2015, **17**, 3122–3129.
- S8 L. Huang and W. D. Wulff, Catalytic asymmetric synthesis of trisubstituted aziridines, *J. Am. Chem. Soc.*, 2011, **133**, 8892–8895.
- S9 C. Rampalakos and W. D. Wulff, A novel bis-thiourea organocatalyst for the asymmetric aza-Henry reaction, *Adv. Synth. Catal.*, 2008, **350**, 1785–1790.
- S10 A. G. Wenzel and E. N. Jacobsen, Asymmetric catalytic Mannich reactions catalyzed by urea derivatives: Enantioselective synthesis of  $\beta$ -aryl- $\beta$ -amino acids, *J. Am. Chem. Soc.*, 2002, **124**, 12964–12965.
- S11 B. Karimi, E. Jafari and D. Enders, Highly efficient catalytic enantioselective mannich reaction of malonates with N-tert-butoxycarbonyl imines by using Yb(OTf)<sub>3</sub>/pybox catalysts at room temperature, *Chem. Eur. J.*, 2013, **19**, 10142–10145.
- S12 L. Bernardi, F. Fini, R. P. Herrera, A. Ricci and V. Sgarzani, Enantioselective aza-Henry reaction using cinchona organocatalysts, *Tetrahedron*, 2006, **62**, 375–380.
- S13 X. Jiang, Y. Zhang, L. Wu, G. Zhang, X. Liu, H. Zhang, D. Fu and R. Wang, Doubly stereocontrolled asymmetric aza-henry reaction with in situ generation of n-boc-imines catalyzed by novel rosin-derived amine thiourea catalysts, *Adv. Synth. Catal.*, 2009, **351**, 2096–2100.
- S14 C. J. Wang, X. Q. Dong, Z. H. Zhang, Z. Y. Xue and H. L. Teng, Highly anti-selective asymmetric nitro-mannich reactions catalyzed by bifunctional amine-thiourea-bearing multiple hydrogen-bonding donors, *J. Am. Chem. Soc.*, 2008, **130**, 8606–8607.
- S15 D. Cao, Z. Chai, J. Zhang, Z. Ye, H. Xiao, H. Wang, J. Chen, X. Wu and G. Zhao, Thiourea-phosphonium salts from amino acids: Cooperative phase-transfer catalysts in the enantioselective aza-Henry reaction, *Chem. Commun.*, 2013, **49**, 5972–5974.
- S16 F. Fini, V. Sgarzani, D. Pettersen, R. P. Herrera, L. Bernardi and A. Ricci, Phase-transfer-catalyzed asymmetric aza-Henry reaction using N-carbamoyl imines generated in situ from  $\alpha$ -amido

- sulfones, *Angew. Chem. Int. Ed.*, 2005, **44**, 7975–7978.
- S17 H. Ishitani, K. Kanai and S. Kobayashi, Continuous-Flow Enantioselective 1,4-Addition Reactions of Malonates with Nitroolefins on Ni-Supported Mesoporous Silica Materials with Co-feeding of a Chiral Ligand, *Adv. Synth. Catal.*, 2023, **365**, 1526–1530.
- S18 Y. Ren, M. Wang, Q. Yang and J. Zhu, Merging Chiral Diamine and Ni/SiO<sub>2</sub> for Heterogeneous Asymmetric 1,4-Addition Reactions, *ACS Catal.*, 2023, **13**, 1974–1982.
- S19 D. Bécart, V. Diemer, A. Salaün, M. Oiarbide, Y. R. Nelli, B. Kauffmann, L. Fischer, C. Palomo and G. Guichard, Helical Oligoureia Foldamers as Powerful Hydrogen Bonding Catalysts for Enantioselective C-C Bond-Forming Reactions, *J. Am. Chem. Soc.*, 2017, **139**, 12524–12532.
- S20 F. X. Chen, C. Shao, Q. Wang, P. Gong, D. Y. Zhang, B. Z. Zhang and R. Wang, An enantioselective Michael addition of malonate to nitroalkenes catalyzed by low loading demethylquinine salts in water, *Tetrahedron Lett.*, 2007, **48**, 8456–8459.
